# Supplementary material for: The RNA-binding protein La/SSB drives head and neck squamous cell carcinoma progression through TFAP2C-mediated transcriptional activation of FSCN1
Source: Research Square preprint supplement (doi:10.21203/rs.3.rs-8395850/v1), 2026-01-21
Supplement: Supplementary file 1 [file 65a9f02c238dede845d0cd04.xlsx]

## Sheet: Sheet1
Supplementary Table S2. Differentially accessible regions from ATAC-seq analysis (shSSB FaDu cells vs. shSc FaDu cells)
seqnames	start	end	width	Conc	Conc_shSSB	Conc_shNC	Fold	p.value	FDR
14	34237027	34237471	445	4.02	1.79	4.86	-3.07	1.32e-07	0.0117
3	39013754	39014459	706	4.49	2.75	5.25	-2.5	3e-07	0.0122
19	57799004	57799599	596	5.28	3.79	6	-2.21	4.84e-07	0.0122
2	162091508	162092063	556	4.73	3.21	5.45	-2.24	5.48e-07	0.0122
20	5844194	5844774	581	5.82	4.38	6.52	-2.14	1.29e-06	0.0229
1	41109346	41110298	953	5.7	4.48	6.35	-1.88	2.04e-06	0.0271
2	105515618	105516201	584	4.39	2.93	5.1	-2.17	2.38e-06	0.0271
3	177596928	177597300	373	4.52	3.11	5.22	-2.11	3.01e-06	0.0271
2	99471961	99472513	553	4.35	2.72	5.1	-2.38	3.06e-06	0.0271
10	62112063	62112817	755	5.59	4.26	6.27	-2.01	4.08e-06	0.0301
2	220279296	220279773	478	4.73	3.27	5.44	-2.17	4.3e-06	0.0301
8	19127849	19128713	865	5.3	3.89	6	-2.11	4.41e-06	0.0301
9	14710810	14711233	424	4.72	3.34	5.41	-2.07	5.96e-06	0.0378
12	75651203	75651742	540	4.28	2.76	5	-2.24	8.34e-06	0.0454
3	181850904	181851530	627	4.88	3.53	5.57	-2.04	8.72e-06	0.0454
5	35890507	35890994	488	4.04	2.43	4.79	-2.35	8.94e-06	0.0454
5	154523766	154524093	328	4.51	3.28	5.17	-1.89	9.21e-06	0.0454
6	125245293	125246166	874	6	4.77	6.65	-1.88	1.52e-05	0.0704
21	40886801	40887575	775	5.23	4.04	5.87	-1.82	1.62e-05	0.0704
5	28374403	28375030	628	5.24	3.97	5.91	-1.94	1.66e-05	0.0704
5	13339088	13339675	588	4.97	3.72	5.63	-1.91	2.03e-05	0.0819
2	181810808	181811344	537	4.43	3.09	5.12	-2.03	2.28e-05	0.088
11	86115933	86116750	818	4.64	3.34	5.32	-1.98	2.81e-05	0.0988
3	172096943	172097470	528	4.36	2.96	5.05	-2.09	2.92e-05	0.0988
15	42934915	42935423	509	4.84	3.67	5.47	-1.81	2.92e-05	0.0988
6	148857754	148858256	503	4.65	3.25	5.34	-2.1	3.01e-05	0.0988
2	179268325	179268832	508	5.42	4.25	6.06	-1.81	3.14e-05	0.0993
5	29113978	29114928	951	5.76	4.45	6.43	-1.99	3.48e-05	0.103
2	72091967	72092640	674	5.35	4.28	5.96	-1.68	3.91e-05	0.105
1	118635517	118636426	910	5.7	4.65	6.3	-1.64	3.99e-05	0.105
15	94080363	94081047	685	6.33	5	7	-2	4.16e-05	0.105
16	85924699	85925090	392	4.13	2.8	4.82	-2.02	4.31e-05	0.105
1	173190318	173190937	620	5.05	3.84	5.7	-1.86	4.58e-05	0.105
2	18991476	18992089	614	4.09	2.61	4.81	-2.2	4.58e-05	0.105
4	99091830	99092185	356	4.08	2.52	4.81	-2.28	4.6e-05	0.105
10	65229687	65230171	485	4.28	2.93	4.96	-2.03	4.64e-05	0.105
6	21738278	21739149	872	4.91	3.74	5.54	-1.8	4.72e-05	0.105
3	168877838	168878315	478	3.99	2.46	4.71	-2.25	4.77e-05	0.105
3	102162984	102163786	803	4.84	3.47	5.53	-2.06	4.87e-05	0.105
5	16736189	16736706	518	5.53	4.42	6.15	-1.73	5.24e-05	0.107
3	138694145	138694832	688	4.94	3.84	5.56	-1.71	5.27e-05	0.107
3	171791739	171792313	575	4.74	3.74	5.33	-1.59	5.35e-05	0.107
13	41696462	41697021	560	4.71	3.3	5.41	-2.11	5.42e-05	0.107
3	172153203	172153897	695	5.65	4.69	6.23	-1.54	5.69e-05	0.108
16	20904739	20905054	316	5.13	3.96	5.77	-1.82	5.89e-05	0.109
1	228838230	228838819	590	4.92	3.97	5.5	-1.53	6.01e-05	0.109
15	80954274	80954815	542	5.87	4.89	6.45	-1.57	6.31e-05	0.112
9	28234786	28235248	463	4.38	3.17	5.04	-1.87	6.53e-05	0.114
3	183295208	183295851	644	6.55	5.52	7.14	-1.62	6.77e-05	0.116
1	93597711	93598112	402	4.7	3.56	5.33	-1.77	6.9e-05	0.116
8	60950872	60951414	543	5.45	4.47	6.03	-1.56	7.3e-05	0.12
X	142250256	142251145	890	5.8	4.94	6.33	-1.39	7.49e-05	0.121
15	59170151	59170750	600	5.23	4.11	5.86	-1.75	7.61e-05	0.121
8	75702528	75703035	508	4.09	2.73	4.77	-2.04	7.96e-05	0.124
14	45785232	45785834	603	4.96	3.8	5.6	-1.8	8.67e-05	0.132
8	29085925	29086532	608	4.12	2.89	4.77	-1.88	8.75e-05	0.132
14	90970051	90970559	509	4.85	3.72	5.48	-1.75	8.96e-05	0.132
9	107389515	107390235	721	6.45	5.31	7.08	-1.77	9.2e-05	0.132
19	7421990	7422699	710	5.87	4.93	6.43	-1.49	9.38e-05	0.132
4	38313913	38314903	991	5.95	4.76	6.6	-1.84	9.58e-05	0.133
14	92723462	92723879	418	5.37	4.29	5.98	-1.69	9.84e-05	0.134
8	100258396	100258954	559	4.96	3.77	5.6	-1.83	0.0001	0.134
3	41158578	41159418	841	5.13	4.04	5.74	-1.7	0.000108	0.141
12	116559234	116559968	735	5.52	4.57	6.09	-1.51	0.000109	0.141
7	26948600	26949124	525	4.24	3.07	4.88	-1.81	0.000109	0.141
16	84879553	84880256	704	6.19	5.19	6.77	-1.58	0.000113	0.143
5	173329422	173329964	543	6.2	5.2	6.78	-1.58	0.000117	0.146
6	105599545	105599981	437	4.04	2.74	4.71	-1.98	0.000121	0.148
16	29709746	29710073	328	4.14	2.84	4.81	-1.96	0.000122	0.148
3	136994683	136995296	614	5.76	4.55	6.41	-1.86	0.000132	0.156
1	182181085	182181609	525	5.1	4.09	5.69	-1.6	0.000135	0.156
5	21807935	21808379	445	4.55	3.22	5.23	-2.01	0.000136	0.156
8	8625679	8626213	535	5.04	3.88	5.67	-1.8	0.000136	0.156
3	178623688	178624118	431	4.88	3.85	5.48	-1.62	0.000142	0.161
3	187186748	187187479	732	5.95	4.94	6.54	-1.6	0.000143	0.161
3	145939370	145940201	832	5.37	4.33	5.97	-1.63	0.000149	0.165
3	154151723	154152452	730	4.61	3.58	5.2	-1.62	0.000155	0.169
1	68221080	68222300	1221	4.68	3.54	5.31	-1.77	0.000161	0.169
2	81871888	81872495	608	4.07	2.92	4.71	-1.78	0.000161	0.169
7	155860784	155861612	829	6.74	5.67	7.34	-1.67	0.000162	0.169
1	219177378	219177706	329	4.11	2.95	4.75	-1.8	0.000164	0.169
3	149224939	149225709	771	5.84	4.91	6.4	-1.49	0.000164	0.169
4	70584312	70584907	596	4.45	3.2	5.12	-1.92	0.00017	0.169
3	135935226	135935997	772	5.12	4.18	5.68	-1.5	0.000171	0.169
14	71803369	71804124	756	5.87	5.02	6.4	-1.38	0.000172	0.169
2	172710514	172711043	530	5.01	3.84	5.65	-1.81	0.000173	0.169
15	99433289	99433729	441	4.94	4.04	5.49	-1.45	0.00018	0.174
18	45166286	45166970	685	4.53	3.23	5.2	-1.97	0.000188	0.178
3	139534189	139534872	684	4.93	3.85	5.54	-1.69	0.000189	0.178
1	92326349	92327075	727	7.44	6.18	8.11	-1.92	0.000192	0.179
1	169675931	169676468	538	4.48	3.25	5.13	-1.88	0.000195	0.181
7	139783584	139784037	454	4.38	3.24	5.01	-1.77	0.000199	0.182
16	29521455	29521922	468	4.21	2.99	4.86	-1.87	0.00021	0.19
7	104943550	104943960	411	4.44	3.2	5.09	-1.89	0.000214	0.191
1	14291004	14291762	759	4.7	3.65	5.3	-1.65	0.000216	0.191
3	171351635	171352094	460	4.86	3.71	5.5	-1.79	0.000218	0.191
9	14713280	14713765	486	5.11	4.18	5.66	-1.48	0.000224	0.195
8	81286583	81287070	488	4.43	3.28	5.07	-1.79	0.000226	0.195
8	108139664	108140269	606	5.57	4.53	6.16	-1.63	0.000228	0.195
12	40387194	40387900	707	4.16	3.03	4.79	-1.76	0.000243	0.205
20	18879051	18879814	764	5.23	4.23	5.82	-1.59	0.000244	0.205
3	186990850	186991677	828	4.8	3.83	5.37	-1.54	0.000251	0.208
9	99389126	99389668	543	5.17	4.13	5.77	-1.64	0.000271	0.223
12	26768815	26769499	685	4.55	3.41	5.18	-1.77	0.000274	0.223
3	149298165	149298728	564	4.65	3.64	5.24	-1.59	0.000286	0.227
10	15123705	15124216	512	4.71	3.55	5.34	-1.79	0.000288	0.227
1	47555155	47555773	619	5.55	4.61	6.11	-1.5	0.000288	0.227
X	74104354	74105103	750	5.62	4.67	6.19	-1.53	0.000291	0.227
11	61297699	61298109	411	5.34	4.34	5.92	-1.58	0.000305	0.227
1	164659911	164660729	819	4.74	3.76	5.32	-1.56	0.000307	0.227
2	149732158	149732997	840	4.35	3.11	5.01	-1.9	0.000308	0.227
2	17441165	17442076	912	5.58	4.45	6.2	-1.75	0.000308	0.227
8	129996664	129997036	373	5.18	4.19	5.77	-1.58	0.000309	0.227
7	3761632	3762414	783	4.25	3.18	4.86	-1.68	0.000309	0.227
20	1499462	1500347	886	5.46	4.58	6.01	-1.43	0.00031	0.227
13	50644223	50645333	1111	6.45	5.42	7.04	-1.62	0.00031	0.227
8	57227375	57227746	372	4.77	3.81	5.34	-1.53	0.000318	0.227
X	17559857	17560413	557	4.01	2.74	4.68	-1.93	0.000324	0.227
8	123661916	123662557	642	5.6	4.62	6.18	-1.56	0.000327	0.227
3	125062916	125063618	703	6.27	5.26	6.86	-1.6	0.000328	0.227
4	150256950	150257303	354	4.19	3.09	4.8	-1.71	0.000334	0.227
18	14974600	14975496	897	5.23	4.29	5.79	-1.5	0.000339	0.227
13	29567315	29567920	606	4.55	3.52	5.15	-1.63	0.00034	0.227
5	134018355	134019038	684	5.16	4.23	5.72	-1.49	0.000342	0.227
14	55884609	55885181	573	4.6	3.56	5.19	-1.64	0.000343	0.227
3	105792272	105792904	633	5.01	4.21	5.53	-1.32	0.000348	0.227
8	54896670	54897240	571	4.16	3.03	4.78	-1.75	0.000349	0.227
3	141337139	141337725	587	5.44	4.37	6.05	-1.68	0.000352	0.227
8	62947594	62948153	560	4.67	3.72	5.23	-1.51	0.000353	0.227
4	104967081	104967470	390	4.04	2.93	4.66	-1.73	0.000356	0.227
8	80534284	80534782	499	5.48	4.56	6.04	-1.48	0.000357	0.227
2	23563883	23564992	1110	6.47	5.42	7.07	-1.65	0.000357	0.227
14	61438814	61439439	626	4.81	3.87	5.38	-1.51	0.000357	0.227
17	75352040	75352639	600	5.43	4.55	5.97	-1.41	0.000358	0.227
5	126106003	126106536	534	4.62	3.67	5.19	-1.52	0.000366	0.23
1	164611748	164612309	562	4.52	3.43	5.14	-1.71	0.000376	0.235
12	1217133	1217639	507	4.74	3.89	5.27	-1.38	0.000385	0.239
19	57689686	57690160	475	4.99	4.05	5.55	-1.51	0.000389	0.24
7	142956908	142957964	1057	5.67	4.84	6.19	-1.36	0.000397	0.243
2	134683500	134683999	500	4.21	3.02	4.86	-1.84	0.000405	0.245
3	142272235	142272765	531	4.11	2.99	4.73	-1.74	0.000406	0.245
1	107536234	107536598	365	4.26	3.09	4.89	-1.8	0.000414	0.248
14	73180159	73180629	471	4.65	3.61	5.25	-1.63	0.000432	0.252
4	139887982	139888508	527	5.1	4.17	5.66	-1.49	0.000436	0.252
19	31153875	31154511	637	4.65	3.67	5.23	-1.56	0.000438	0.252
2	46408740	46409572	833	6.64	5.55	7.25	-1.7	0.00044	0.252
6	169224213	169224657	445	4.54	3.58	5.11	-1.54	0.00044	0.252
9	3478536	3479027	492	4.27	3.19	4.89	-1.69	0.000441	0.252
5	17865924	17866439	516	4.43	3.34	5.05	-1.7	0.000443	0.252
2	170374640	170375649	1010	5.8	4.97	6.33	-1.36	0.000443	0.252
6	36826988	36827830	843	6.46	5.48	7.04	-1.56	0.000454	0.257
8	102749740	102750147	408	5.3	4.46	5.83	-1.37	0.000467	0.26
17	349053	349423	371	4.18	3.04	4.81	-1.78	0.000467	0.26
2	179106408	179107140	733	5.03	4.03	5.61	-1.58	0.000468	0.26
8	28699681	28700107	427	5.13	4.14	5.71	-1.56	0.000479	0.263
3	166900839	166901611	773	5.01	4.18	5.53	-1.36	0.000499	0.272
2	175630861	175631359	499	4.13	3.13	4.71	-1.59	0.000504	0.273
21	15210128	15210713	586	4.54	3.52	5.14	-1.62	0.000513	0.275
14	102125440	102125905	466	4.18	3.12	4.78	-1.67	0.000513	0.275
5	43231907	43232480	574	4.31	3.35	4.88	-1.53	0.000521	0.276
2	106272270	106272683	414	4.12	3.05	4.73	-1.67	0.000523	0.276
1	157132582	157133064	483	4.7	3.57	5.33	-1.76	0.00053	0.278
1	231407869	231408373	505	4.34	3.36	4.91	-1.56	0.000543	0.282
15	39624788	39625227	440	4.36	3.4	4.92	-1.52	0.000549	0.283
8	97697440	97698030	591	4.62	3.77	5.16	-1.39	0.000555	0.285
8	143382557	143383026	470	6.64	5.78	7.17	-1.39	0.00056	0.285
10	73419491	73419786	296	4.34	3.17	4.98	-1.81	0.000561	0.285
13	48400847	48401273	427	4.5	3.44	5.11	-1.67	0.000572	0.285
15	39721007	39721748	742	5.09	4.28	5.61	-1.33	0.000574	0.285
2	71930002	71930283	282	4.36	3.28	4.97	-1.69	0.000578	0.285
4	98446603	98447396	794	4.18	3.14	4.77	-1.63	0.000583	0.285
16	14097104	14097484	381	4.22	3.22	4.8	-1.58	0.000587	0.285
5	14676359	14676830	472	5.73	4.95	6.23	-1.27	0.000588	0.285
1	204841777	204842212	436	4.35	3.2	4.98	-1.77	0.000589	0.285
11	94845563	94846238	676	5.09	4.3	5.6	-1.31	0.000589	0.285
X	125544541	125545414	874	5.42	4.41	6	-1.59	0.000591	0.285
8	53317010	53317519	510	5.4	4.47	5.96	-1.49	0.000601	0.286
19	18385904	18386419	516	6.21	5.13	6.82	-1.68	0.000601	0.286
16	53732359	53733073	715	4.58	3.73	5.11	-1.37	0.000604	0.286
9	12859808	12860267	460	4.02	2.97	4.62	-1.65	0.000607	0.286
3	177377101	177377632	532	6.11	5.11	6.7	-1.59	0.000618	0.286
13	48709187	48709656	470	4.8	3.83	5.37	-1.55	0.00062	0.286
15	59165703	59166040	338	4.09	3.04	4.7	-1.66	0.000624	0.286
2	96888466	96888912	447	5.53	4.71	6.05	-1.35	0.000626	0.286
5	35922470	35922820	351	4.62	3.66	5.19	-1.53	0.000627	0.286
13	26459127	26459795	669	4.76	3.91	5.29	-1.39	0.000631	0.286
5	166909083	166909638	556	4.37	3.44	4.94	-1.5	0.000634	0.286
17	564378	564875	498	4.51	3.42	5.13	-1.71	0.000636	0.286
1	86207310	86207838	529	4.04	3.04	4.62	-1.59	0.000639	0.286
4	77226904	77227591	688	4.43	3.39	5.03	-1.64	0.000646	0.286
11	128026607	128027004	398	4.01	2.82	4.65	-1.83	0.000655	0.286
8	57336465	57336992	528	5.01	4.13	5.55	-1.42	0.000655	0.286
7	64999345	64999963	619	4.97	4	5.54	-1.54	0.000656	0.286
3	196792961	196793723	763	5.6	4.68	6.16	-1.48	0.000657	0.286
3	12534217	12534956	740	4.82	3.86	5.39	-1.53	0.00066	0.286
1	218397692	218398355	664	4.61	3.56	5.21	-1.65	0.000661	0.286
7	30166105	30166774	670	5.2	4.29	5.75	-1.47	0.000669	0.288
5	120160111	120160657	547	5.34	4.44	5.89	-1.44	0.000673	0.288
1	120529450	120530023	574	4.32	3.35	4.9	-1.55	0.000681	0.288
5	39196511	39197010	500	5.18	4.1	5.79	-1.69	0.000681	0.288
11	15053118	15053802	685	4.47	3.59	5.01	-1.42	0.000685	0.288
14	97499668	97500519	852	6.65	5.75	7.2	-1.46	0.000686	0.288
3	189304419	189305318	900	5.32	4.42	5.87	-1.44	0.000691	0.288
4	112416465	112416887	423	4.98	4.04	5.55	-1.51	0.000694	0.288
1	200150659	200151184	526	5.05	4.23	5.57	-1.33	0.000701	0.288
5	20972403	20972978	576	5.44	4.56	5.98	-1.42	0.000704	0.288
13	45189375	45190009	635	4.16	3.06	4.78	-1.72	0.000711	0.29
4	180913618	180914333	716	4.06	2.95	4.68	-1.73	0.000728	0.294
2	156083446	156084239	794	4.44	3.59	4.98	-1.39	0.000737	0.295
3	53570692	53571210	519	4.93	4.04	5.48	-1.45	0.00074	0.295
5	31948019	31948415	397	4.71	3.83	5.26	-1.43	0.000741	0.295
3	172562841	172563179	339	4.72	3.8	5.28	-1.48	0.000759	0.301
8	75314395	75315066	672	5.42	4.46	5.99	-1.53	0.000769	0.301
3	148681061	148681532	472	4.6	3.59	5.19	-1.6	0.000772	0.301
11	110194199	110194683	485	4.47	3.55	5.03	-1.48	0.000772	0.301
16	48127004	48127567	564	6.12	5.27	6.65	-1.39	0.000774	0.301
15	93771624	93771963	340	4.15	3.06	4.76	-1.7	0.000782	0.303
12	114813150	114813636	487	4	2.8	4.64	-1.84	0.000786	0.303
7	7772318	7772794	477	4.39	3.45	4.96	-1.51	0.000792	0.303
17	73625837	73626708	872	5.41	4.66	5.9	-1.24	0.000794	0.303
11	120908493	120909326	834	5.83	4.93	6.39	-1.45	0.000797	0.303
18	48848389	48849208	820	5.53	4.78	6.02	-1.23	0.0008	0.303
1	172358783	172359341	559	4.2	3.25	4.77	-1.51	0.000806	0.303
22	43174980	43175604	625	7.86	6.86	8.44	-1.58	0.000807	0.303
3	159732176	159733043	868	6.08	5.32	6.57	-1.25	0.000811	0.304
4	97507795	97508219	425	4.36	3.32	4.96	-1.63	0.000815	0.304
1	61992982	61993763	782	4.47	3.61	5	-1.39	0.000824	0.305
6	135922063	135922618	556	4.83	3.85	5.4	-1.55	0.000831	0.305
21	39742279	39742982	704	4.23	3.22	4.81	-1.6	0.000832	0.305
15	74642362	74642937	576	4.33	3.32	4.92	-1.6	0.000835	0.305
11	72180900	72182014	1115	5.9	5.14	6.4	-1.26	0.000838	0.305
17	76251907	76252508	602	5.08	4.31	5.57	-1.26	0.000842	0.305
3	4906142	4906758	617	5.22	4.32	5.77	-1.45	0.000843	0.305
1	201741483	201742097	615	5.11	4.36	5.6	-1.24	0.000848	0.305
4	101693709	101694316	608	4.55	3.46	5.17	-1.71	0.00085	0.305
10	34254578	34254984	407	4.18	3.14	4.77	-1.63	0.000867	0.309
13	109998683	109999288	606	6.02	5.14	6.57	-1.43	0.000871	0.309
6	24858035	24859058	1024	4.75	3.8	5.32	-1.51	0.000871	0.309
11	105100134	105100649	516	4.37	3.32	4.97	-1.65	0.000873	0.309
3	11817972	11818410	439	4.89	3.99	5.44	-1.44	0.000892	0.313
9	89435470	89435885	416	5.67	4.89	6.17	-1.28	0.000899	0.314
16	69404418	69404854	437	5.45	4.5	6.02	-1.52	0.000911	0.314
4	114015332	114016024	693	4.87	3.99	5.41	-1.42	0.000917	0.314
14	42192643	42193679	1037	5.16	4.24	5.72	-1.48	0.00092	0.314
8	58595821	58596501	681	5.01	4.12	5.56	-1.44	0.000927	0.314
17	71208044	71208775	732	5.59	4.71	6.14	-1.43	0.000931	0.314
7	88289480	88289967	488	4.87	4.06	5.39	-1.32	0.000937	0.314
12	43370164	43370728	565	4.52	3.6	5.08	-1.49	0.000939	0.314
8	139675817	139676123	307	4.37	3.51	4.91	-1.4	0.00094	0.314
6	11735242	11735936	695	4.16	3.15	4.75	-1.61	0.000941	0.314
7	2956751	2957383	633	5.99	5.08	6.54	-1.47	0.000943	0.314
11	76788400	76789123	724	6.44	5.59	6.97	-1.38	0.000947	0.314
6	47656079	47656735	657	5.18	4.37	5.69	-1.32	0.000952	0.314
10	48508572	48508942	371	4.26	3.34	4.82	-1.48	0.000953	0.314
5	128349214	128349679	466	4.68	3.65	5.28	-1.63	0.000958	0.314
8	132920636	132921062	427	5.07	4.34	5.55	-1.21	0.00096	0.314
12	16347327	16347856	530	5.37	4.42	5.94	-1.51	0.000961	0.314
3	39021833	39022455	623	5.01	4.14	5.55	-1.41	0.000962	0.314
3	174784298	174784873	576	4.34	3.41	4.91	-1.5	0.000967	0.314
15	92821697	92822052	356	4.38	3.43	4.94	-1.52	0.000973	0.314
7	24192035	24192525	491	4.6	3.64	5.17	-1.53	0.000974	0.314
9	68500604	68501147	544	4.56	3.69	5.1	-1.41	0.00098	0.314
1	201476026	201477018	993	6.21	5.44	6.71	-1.27	0.000981	0.314
8	54551673	54552085	413	4.82	4.01	5.34	-1.33	0.000984	0.314
14	55721285	55721808	524	6.06	5.07	6.64	-1.57	0.000985	0.314
5	36657472	36657984	513	5.19	4.38	5.7	-1.32	0.00099	0.314
1	150619896	150620261	366	5.03	4.13	5.58	-1.45	0.000991	0.314
6	71410003	71410438	436	4.61	3.69	5.17	-1.48	0.000995	0.314
15	73936148	73936556	409	4.94	4.15	5.44	-1.29	0.000997	0.314
7	116217957	116218579	623	4.87	3.97	5.42	-1.45	0.00101	0.314
12	109462469	109462984	516	4.58	3.73	5.11	-1.38	0.00101	0.314
3	148372264	148372857	594	4.03	2.84	4.67	-1.84	0.00102	0.314
13	26022555	26023241	687	5.51	4.69	6.03	-1.34	0.00102	0.314
X	121823421	121824095	675	4.69	3.82	5.24	-1.42	0.00102	0.314
2	235320320	235320699	380	4.16	3.12	4.76	-1.64	0.00102	0.314
2	80458936	80459443	508	5.22	4.38	5.75	-1.37	0.00103	0.314
21	45228188	45228916	729	5.31	4.57	5.8	-1.23	0.00103	0.314
7	16652657	16653213	557	4.07	2.95	4.69	-1.73	0.00103	0.314
2	233209382	233209857	476	5.54	4.81	6.02	-1.21	0.00104	0.314
1	41870066	41870550	485	4.63	3.65	5.21	-1.56	0.00104	0.314
18	43719346	43719881	536	4.04	2.74	4.71	-1.98	0.00104	0.314
13	35552119	35553022	904	4.7	3.78	5.26	-1.47	0.00105	0.316
21	33212509	33212933	425	4.18	3.12	4.79	-1.67	0.00106	0.318
2	34836349	34836895	547	4.56	3.61	5.13	-1.52	0.00107	0.319
8	55079708	55080426	719	5.04	4.24	5.56	-1.31	0.00107	0.319
3	188431522	188431982	461	4.1	3.08	4.69	-1.61	0.00108	0.319
4	39036170	39036980	811	4.69	3.9	5.2	-1.31	0.00111	0.326
13	31982542	31982890	349	4.28	3.1	4.92	-1.82	0.00111	0.327
9	3906610	3907251	642	6.15	5.37	6.66	-1.29	0.00113	0.327
12	54432321	54432825	505	5.23	4.3	5.8	-1.5	0.00113	0.327
3	182644224	182645202	979	5.5	4.66	6.03	-1.37	0.00113	0.327
12	13223134	13223669	536	5.36	4.41	5.92	-1.51	0.00114	0.327
2	133818089	133818679	591	5.1	4.1	5.69	-1.59	0.00114	0.327
15	59594456	59594981	526	4.41	3.53	4.96	-1.43	0.00114	0.327
5	39255431	39255776	346	4.02	3.06	4.59	-1.53	0.00114	0.327
18	48073246	48073855	610	4.35	3.3	4.96	-1.66	0.00115	0.327
17	72468134	72468696	563	5.49	4.57	6.05	-1.48	0.00116	0.327
12	56028534	56029391	858	5.88	5.04	6.41	-1.37	0.00116	0.327
12	65891785	65892471	687	4.91	4.05	5.44	-1.38	0.00116	0.327
3	172536603	172537374	772	5.35	4.54	5.87	-1.33	0.00116	0.327
7	47336080	47336529	450	4.27	3.23	4.86	-1.63	0.00117	0.327
1	208807362	208808041	680	5.05	4.14	5.61	-1.47	0.00118	0.33
3	97232445	97233252	808	5.08	4.2	5.62	-1.43	0.00119	0.332
8	133390942	133391375	434	5.38	4.53	5.9	-1.37	0.0012	0.334
14	32087300	32087801	502	4.16	3.12	4.75	-1.64	0.0012	0.334
3	9897828	9898296	469	5.71	4.92	6.21	-1.29	0.00121	0.334
1	219460972	219461660	689	4.3	3.25	4.9	-1.65	0.00122	0.336
22	49930943	49931315	373	7.07	6.26	7.58	-1.32	0.00125	0.343
4	86977545	86978103	559	5.86	4.84	6.45	-1.62	0.00126	0.344
4	123555389	123555980	592	4.99	4.16	5.51	-1.35	0.00127	0.347
5	18553155	18553856	702	4.83	4.06	5.33	-1.27	0.00128	0.347
3	168002772	168003388	617	4.3	3.4	4.84	-1.44	0.00128	0.348
8	119176905	119177690	786	6.39	5.51	6.93	-1.42	0.00129	0.348
X	153539444	153539868	425	4.06	3.06	4.65	-1.59	0.00129	0.348
1	231777989	231778594	606	4.2	3.22	4.78	-1.56	0.00132	0.352
3	187063672	187064672	1001	4.87	4.06	5.39	-1.33	0.00133	0.352
5	142959957	142960716	760	4.53	3.67	5.06	-1.39	0.00133	0.352
2	23492937	23493291	355	4.08	2.98	4.69	-1.71	0.00135	0.352
9	11159375	11159808	434	4.35	3.37	4.93	-1.56	0.00135	0.352
14	72049453	72049864	412	4.31	3.48	4.84	-1.35	0.00135	0.352
8	53759897	53760658	762	6.1	5.13	6.68	-1.54	0.00135	0.352
6	142756120	142756703	584	5.27	4.36	5.83	-1.47	0.00136	0.352
3	149180034	149180585	552	5.72	4.82	6.27	-1.45	0.00136	0.352
5	23631235	23631985	751	5.3	4.56	5.79	-1.23	0.00136	0.352
14	64569076	64569436	361	5.07	4.16	5.62	-1.46	0.00137	0.352
8	101245358	101245813	456	5.67	4.73	6.24	-1.5	0.00137	0.352
2	109213686	109214448	763	6.26	5.3	6.83	-1.52	0.00137	0.352
7	5591516	5592099	584	6.07	5.2	6.61	-1.41	0.00137	0.352
18	32372274	32373061	788	6.27	5.36	6.82	-1.46	0.00137	0.352
6	144278620	144279054	435	4.29	3.39	4.84	-1.45	0.00139	0.352
7	111499015	111499510	496	5.47	4.57	6.02	-1.44	0.00139	0.352
11	58658562	58658988	427	4.47	3.68	4.97	-1.29	0.00139	0.352
6	84836297	84836637	341	4.53	3.65	5.07	-1.42	0.00139	0.352
8	123057920	123058847	928	5.76	4.91	6.29	-1.38	0.0014	0.352
2	108957992	108958373	382	4.23	3.2	4.82	-1.62	0.00141	0.352
6	47169730	47170234	505	5.05	4.1	5.62	-1.52	0.00141	0.352
22	25400840	25401360	521	5.2	4.48	5.67	-1.19	0.00142	0.352
11	123487167	123487762	596	4.64	3.71	5.2	-1.49	0.00142	0.352
12	106288425	106289044	620	5.22	4.45	5.72	-1.27	0.00143	0.352
8	129731180	129731512	333	4.55	3.6	5.12	-1.52	0.00143	0.352
2	134131535	134132116	582	5.08	4.15	5.64	-1.48	0.00143	0.352
8	21683840	21684375	536	4.34	3.46	4.88	-1.42	0.00143	0.352
14	61381450	61381975	526	4.96	4.19	5.46	-1.27	0.00144	0.352
17	80850718	80851255	538	5.59	4.84	6.08	-1.24	0.00148	0.361
9	97041929	97042290	362	4.69	3.7	5.27	-1.58	0.00149	0.364
2	53353361	53353797	437	4	3	4.58	-1.58	0.00152	0.369
3	177601150	177601573	424	4.83	3.86	5.4	-1.55	0.00152	0.369
3	166444081	166445103	1023	6.78	5.93	7.31	-1.38	0.00153	0.37
8	130762204	130762694	491	5.91	5.19	6.39	-1.2	0.00154	0.371
11	102869174	102869942	769	5.68	4.85	6.2	-1.35	0.00154	0.371
1	48876140	48876683	544	5.33	4.55	5.83	-1.28	0.00155	0.371
14	28083253	28083892	640	4.98	4.2	5.49	-1.29	0.00156	0.371
11	62241699	62242484	786	6.88	6.07	7.39	-1.32	0.00156	0.371
15	61750398	61751085	688	4.87	4	5.4	-1.4	0.00156	0.371
7	121113275	121113728	454	4.28	3.27	4.86	-1.59	0.00157	0.371
3	63872171	63872728	558	4.03	2.85	4.67	-1.82	0.00158	0.371
13	34359065	34359715	651	5.03	4.19	5.56	-1.38	0.00158	0.371
7	150312795	150313222	428	4.21	3.28	4.78	-1.5	0.00159	0.371
15	52250520	52250832	313	4.54	3.65	5.08	-1.43	0.00159	0.371
9	76521183	76521758	576	4.38	3.35	4.97	-1.62	0.00159	0.371
17	57016626	57017255	630	5.58	4.73	6.11	-1.38	0.00159	0.371
15	53884213	53884736	524	4.02	3.11	4.57	-1.46	0.00161	0.372
9	92715462	92716284	823	7.11	6.18	7.66	-1.48	0.00161	0.372
10	69340764	69341033	270	4.12	3.18	4.68	-1.5	0.00163	0.375
1	208048916	208049287	372	4.29	3.15	4.92	-1.77	0.00166	0.375
19	44718421	44719268	848	5.49	4.71	6	-1.29	0.00166	0.375
10	113093466	113094050	585	4.93	3.94	5.52	-1.57	0.00167	0.375
3	196268175	196268634	460	4.8	3.9	5.36	-1.46	0.00167	0.375
1	149398394	149399065	672	4.24	3.23	4.83	-1.6	0.00167	0.375
16	19184229	19184538	310	4.15	3.05	4.77	-1.72	0.00167	0.375
16	56332513	56333099	587	6.39	5.65	6.87	-1.22	0.00168	0.375
9	107739582	107740106	525	4.89	4.14	5.39	-1.25	0.00169	0.376
12	10740173	10740644	472	4.62	3.71	5.17	-1.45	0.00169	0.376
7	11540189	11540816	628	4.33	3.46	4.87	-1.41	0.0017	0.377
14	90870981	90871284	304	4.14	3.05	4.75	-1.7	0.0017	0.377
8	109745095	109746031	937	5.42	4.64	5.92	-1.28	0.00172	0.379
15	84912095	84912719	625	6.32	5.61	6.8	-1.18	0.00172	0.379
6	82331298	82331872	575	5.08	4.13	5.65	-1.52	0.00174	0.383
11	95119458	95120195	738	5.29	4.41	5.84	-1.43	0.00175	0.383
13	22047488	22047982	495	4.38	3.44	4.94	-1.5	0.00175	0.383
2	173589511	173590822	1312	6.46	5.61	6.98	-1.37	0.00176	0.383
X	134670261	134670854	594	4.41	3.49	4.97	-1.48	0.00176	0.383
6	40907222	40907892	671	5.1	4.14	5.67	-1.53	0.00178	0.386
2	61958032	61958642	611	4.3	3.36	4.86	-1.5	0.00178	0.386
7	107506019	107507292	1274	6.47	5.75	6.96	-1.21	0.00179	0.386
1	164473540	164474124	585	5.13	4.22	5.68	-1.47	0.0018	0.386
21	44165819	44166292	474	4.09	3.01	4.71	-1.69	0.0018	0.386
15	32850048	32850727	680	4.91	3.28	5.66	-2.38	0.00181	0.386
X	31350407	31350996	590	4.9	4.1	5.41	-1.31	0.00182	0.388
2	119218391	119219026	636	5.54	4.73	6.05	-1.32	0.00182	0.388
5	38595114	38595729	616	5.15	4.43	5.63	-1.2	0.00183	0.388
12	130137088	130137597	510	5.12	4.3	5.64	-1.34	0.00185	0.391
2	12456216	12456752	537	5.16	4.26	5.71	-1.45	0.00185	0.391
3	153614539	153614975	437	4.47	3.43	5.07	-1.63	0.0019	0.399
15	52071532	52071952	421	5.17	4.39	5.68	-1.29	0.00191	0.4
8	80366840	80367482	643	4.5	3.55	5.07	-1.53	0.00191	0.4
1	177256240	177256762	523	4.87	3.85	5.46	-1.61	0.00193	0.401
8	143013255	143013835	581	6.22	5.48	6.71	-1.23	0.00193	0.402
10	124627018	124627693	676	6.54	5.72	7.06	-1.34	0.00194	0.403
13	48159464	48160130	667	4.9	3.99	5.46	-1.47	0.00196	0.404
2	138274310	138274869	560	4.91	4.07	5.43	-1.36	0.00197	0.404
6	46062128	46062698	571	4.88	4.04	5.41	-1.37	0.00197	0.404
1	215631469	215632194	726	5.78	4.95	6.31	-1.36	0.00198	0.404
1	38733782	38734248	467	4.64	3.73	5.19	-1.47	0.00198	0.404
X	132940683	132941323	641	5.66	4.8	6.2	-1.4	0.002	0.408
21	37145644	37146241	598	4.73	3.92	5.24	-1.32	0.00201	0.408
8	95225490	95225930	441	5.16	4.32	5.68	-1.36	0.00202	0.409
1	89605780	89606111	332	4.3	3.44	4.83	-1.4	0.00202	0.409
5	43432436	43432836	401	4.37	3.45	4.92	-1.47	0.00203	0.409
3	53154974	53155359	386	5.24	4.45	5.74	-1.3	0.00204	0.411
5	23655589	23656111	523	5.17	4.32	5.71	-1.39	0.00207	0.415
3	150149644	150150123	480	4.34	3.45	4.89	-1.44	0.00207	0.415
21	37647735	37648371	637	5.28	4.53	5.78	-1.24	0.00211	0.42
4	94548550	94549017	468	4.92	4.03	5.46	-1.43	0.00213	0.422
6	73680280	73680941	662	4.15	3.28	4.69	-1.41	0.00213	0.422
10	103450995	103451675	681	5.88	5.16	6.35	-1.19	0.00213	0.422
14	50008958	50009343	386	5.17	4.46	5.64	-1.18	0.00213	0.422
12	70660866	70661243	378	4.06	3.04	4.65	-1.61	0.00214	0.422
20	881167	881918	752	5.67	5.01	6.12	-1.11	0.00214	0.422
5	179198783	179199575	793	5.47	4.75	5.95	-1.2	0.00215	0.422
5	133844797	133845393	597	5.32	4.59	5.8	-1.21	0.00216	0.422
2	98479901	98480639	739	6.47	5.62	7	-1.37	0.00216	0.422
1	86788351	86788902	552	4.06	3.14	4.62	-1.48	0.00217	0.422
8	108576465	108576901	437	4.08	3	4.69	-1.69	0.00218	0.423
8	53520970	53521461	492	5.67	4.96	6.14	-1.18	0.00223	0.431
9	34961885	34962335	451	4.12	3.06	4.73	-1.67	0.00226	0.435
7	96303032	96303651	620	5.53	4.74	6.03	-1.29	0.00227	0.436
3	48222746	48223593	848	5.81	5.01	6.32	-1.31	0.00228	0.437
5	136033799	136034305	507	4.83	4.04	5.33	-1.29	0.0023	0.438
7	42069906	42070553	648	4.46	3.49	5.03	-1.54	0.00231	0.438
9	91536201	91536715	515	4.61	3.81	5.13	-1.31	0.00232	0.438
6	125193037	125193527	491	4.17	2.98	4.82	-1.84	0.00232	0.438
16	86823976	86824904	929	5.45	4.79	5.9	-1.12	0.00233	0.438
2	69756048	69756437	390	4.48	3.56	5.04	-1.48	0.00233	0.438
18	11005419	11005966	548	4.69	3.91	5.19	-1.28	0.00234	0.438
4	113355508	113356336	829	5.12	4.39	5.61	-1.22	0.00234	0.438
7	135213680	135214225	546	5.32	4.48	5.85	-1.37	0.00234	0.438
16	56382833	56383551	719	6.49	5.65	7.01	-1.36	0.00235	0.438
1	221612293	221612853	561	4.35	3.5	4.89	-1.38	0.00236	0.438
8	133919408	133919973	566	6.31	5.47	6.84	-1.37	0.00236	0.438
1	200896652	200897139	488	5.56	4.84	6.04	-1.2	0.00236	0.438
11	111303471	111303896	426	4.97	4.14	5.49	-1.35	0.00236	0.438
7	102151101	102151415	315	5.02	4.23	5.52	-1.29	0.00239	0.439
9	110350897	110351451	555	4.62	3.67	5.19	-1.52	0.00239	0.439
16	28362272	28362998	727	4.87	4.01	5.4	-1.4	0.00239	0.439
1	85320348	85320937	590	4.88	4.1	5.39	-1.29	0.00239	0.439
5	40410286	40411587	1302	6.15	5.25	6.7	-1.45	0.0024	0.439
3	39752165	39753091	927	4.12	3.21	4.67	-1.46	0.00241	0.44
7	47405627	47406372	746	6.17	5.39	6.67	-1.27	0.00243	0.44
12	981131	981601	471	4.99	4.16	5.51	-1.35	0.00244	0.44
11	129787433	129787931	499	4.92	4.13	5.43	-1.3	0.00244	0.44
6	140462674	140463406	733	5.47	4.79	5.93	-1.13	0.00244	0.44
10	116080509	116081035	527	5.27	4.46	5.79	-1.33	0.00245	0.44
1	20476406	20476953	548	4.5	3.71	5	-1.29	0.00245	0.44
16	57409895	57410572	678	6.11	5.32	6.62	-1.3	0.00246	0.44
13	73286951	73287461	511	4.76	3.95	5.28	-1.33	0.00246	0.44
8	132881628	132882198	571	5.77	5.02	6.27	-1.25	0.00247	0.44
X	149829723	149830706	984	4.8	3.84	5.37	-1.53	0.00248	0.442
1	174153411	174154193	783	5.01	4.16	5.54	-1.38	0.00252	0.442
7	93119138	93120166	1029	6.97	6.05	7.53	-1.49	0.00252	0.442
1	153616138	153616717	580	6.74	5.99	7.23	-1.24	0.00252	0.442
22	21668995	21669333	339	4.2	3.33	4.74	-1.41	0.00252	0.442
9	98575426	98576130	705	5.21	4.53	5.67	-1.14	0.00253	0.442
3	176766380	176767944	1565	7.39	6.53	7.93	-1.4	0.00253	0.442
2	172985411	172985947	537	5.62	4.81	6.13	-1.32	0.00253	0.443
8	69031365	69031930	566	4.03	2.93	4.64	-1.71	0.00254	0.443
15	91974349	91974888	540	5.01	4.26	5.5	-1.24	0.00255	0.444
14	77908709	77909174	466	5.2	4.51	5.67	-1.16	0.00256	0.445
8	74048891	74049225	335	4.49	3.66	5.01	-1.35	0.00257	0.446
1	59673313	59674280	968	6.42	5.61	6.94	-1.32	0.00258	0.446
6	17971472	17971803	332	3.99	3.06	4.54	-1.48	0.00259	0.447
6	117167570	117168481	912	7.1	6.27	7.62	-1.35	0.0026	0.447
8	73423148	73423693	546	6.04	5.18	6.58	-1.4	0.00263	0.452
3	31968940	31969560	621	4.74	3.91	5.27	-1.36	0.00263	0.452
3	47910820	47911301	482	4.05	3.08	4.62	-1.54	0.00264	0.452
8	55430342	55431003	662	4.72	3.94	5.23	-1.29	0.00265	0.453
4	52822928	52823811	884	4.99	4.15	5.52	-1.37	0.00266	0.453
7	2169960	2170335	376	4.45	3.62	4.98	-1.36	0.00266	0.453
8	54562882	54563780	899	5.54	4.86	6	-1.15	0.00268	0.455
4	119370405	119370862	458	4.3	3.26	4.89	-1.63	0.00268	0.455
3	38966966	38967527	562	5.29	4.57	5.77	-1.2	0.00269	0.455
7	7415800	7416609	810	6.17	5.34	6.69	-1.34	0.0027	0.455
10	52486710	52487481	772	4.2	3.18	4.79	-1.61	0.00271	0.457
16	70213735	70214391	657	5.25	4.43	5.77	-1.34	0.00272	0.457
X	15475021	15475482	462	4.3	3.28	4.89	-1.61	0.00272	0.457
3	172142459	172142999	541	4.06	3.12	4.62	-1.5	0.00273	0.457
2	168614377	168614968	592	5.23	4.47	5.73	-1.26	0.00276	0.462
5	155002723	155003066	344	4.48	3.65	5.01	-1.36	0.00278	0.464
1	20232567	20232998	432	4.51	3.6	5.06	-1.47	0.00278	0.464
11	49688270	49688580	311	4.01	2.91	4.62	-1.71	0.00281	0.465
3	172140507	172140979	473	4.57	3.73	5.09	-1.37	0.00281	0.465
12	53825208	53825895	688	6.22	5.37	6.75	-1.39	0.00282	0.465
X	31266299	31267140	842	4.4	3.54	4.94	-1.4	0.00282	0.465
1	67880132	67880579	448	4.38	3.52	4.91	-1.39	0.00282	0.465
1	16929423	16929934	512	5.3	4.64	5.75	-1.12	0.00284	0.466
7	35828704	35829542	839	5.05	4.39	5.51	-1.12	0.00287	0.469
10	77410004	77410491	488	5.36	4.65	5.83	-1.18	0.00287	0.469
9	98146056	98146995	940	6.63	5.85	7.13	-1.29	0.00288	0.469
1	231216470	231216878	409	5.45	4.74	5.92	-1.18	0.00289	0.469
3	172550391	172550934	544	6.28	5.42	6.81	-1.39	0.00289	0.469
6	108200625	108201072	448	4.69	3.85	5.21	-1.37	0.0029	0.469
2	85468569	85469174	606	5.3	4.6	5.76	-1.16	0.0029	0.469
3	94159050	94159692	643	4.88	4.12	5.38	-1.26	0.00291	0.469
12	6369199	6369459	261	6.27	5.59	6.73	-1.15	0.00292	0.47
6	10033188	10033913	726	4.69	3.82	5.23	-1.41	0.00293	0.472
3	13836796	13837190	395	4.7	3.95	5.19	-1.24	0.00294	0.472
4	22268469	22269304	836	4.92	4.2	5.39	-1.19	0.00296	0.472
4	100738311	100738874	564	5.64	4.83	6.16	-1.33	0.00297	0.472
2	96617391	96618226	836	5.15	4.28	5.69	-1.41	0.00297	0.472
1	46039485	46039956	472	5.41	4.75	5.86	-1.11	0.00297	0.472
2	36701288	36701898	611	4.94	4.08	5.48	-1.4	0.00298	0.472
3	159751693	159752158	466	5.33	4.63	5.79	-1.17	0.003	0.475
11	129828237	129829062	826	5.96	5.26	6.43	-1.17	0.00302	0.477
1	110383332	110383850	519	5.25	4.31	5.81	-1.5	0.00304	0.477
12	78929040	78929461	422	4.85	4	5.38	-1.38	0.00305	0.477
3	155497904	155498332	429	3.97	3.11	4.51	-1.4	0.00306	0.477
6	43926688	43927626	939	7.05	6.24	7.57	-1.33	0.00306	0.477
18	22466537	22467056	520	6.17	5.34	6.69	-1.36	0.00306	0.477
5	73826585	73827152	568	4.64	3.75	5.19	-1.44	0.00306	0.477
8	55906694	55907235	542	6.23	5.42	6.75	-1.33	0.00306	0.477
7	1567170	1567784	615	5.7	4.93	6.2	-1.27	0.00307	0.477
16	62014280	62014969	690	5.51	4.67	6.04	-1.38	0.00307	0.477
8	52460099	52460589	491	4.98	4.19	5.48	-1.29	0.00308	0.478
7	51079471	51079900	430	5.01	4.25	5.5	-1.24	0.0031	0.479
11	86931789	86932309	521	4.16	3.16	4.74	-1.59	0.00313	0.483
21	33272929	33273372	444	5.99	5.19	6.5	-1.31	0.00314	0.483
3	34174363	34175090	728	5.05	4.33	5.53	-1.2	0.00315	0.483
5	160923938	160924364	427	4.32	3.55	4.82	-1.27	0.00316	0.483
10	102072772	102073205	434	4.48	3.7	4.98	-1.28	0.00317	0.484
3	172355631	172356338	708	5.41	4.78	5.84	-1.06	0.00317	0.484
1	51592498	51593053	556	4.97	4.23	5.46	-1.23	0.00319	0.485
1	86429845	86430677	833	5.1	4.36	5.58	-1.22	0.00319	0.485
1	84847221	84848193	973	6.03	5.39	6.47	-1.09	0.00321	0.487
15	69388237	69388536	300	4.72	3.95	5.22	-1.28	0.00324	0.487
8	53368153	53369823	1671	5.98	5.36	6.41	-1.05	0.00326	0.487
2	85705481	85705882	402	4	3.15	4.53	-1.38	0.00326	0.487
15	98144352	98145064	713	5.03	4.35	5.5	-1.15	0.00326	0.487
6	105553199	105553679	481	4.98	4.24	5.47	-1.23	0.00327	0.487
1	20199304	20199801	498	4.38	3.43	4.95	-1.52	0.00327	0.487
6	146546513	146546912	400	4.87	4.03	5.4	-1.37	0.00329	0.487
12	122072545	122072909	365	4.35	3.53	4.87	-1.34	0.0033	0.487
2	101380238	101380914	677	5.23	4.45	5.73	-1.28	0.0033	0.487
6	82144943	82145378	436	4.36	3.56	4.88	-1.31	0.00331	0.487
8	2025235	2025733	499	4.1	3.25	4.64	-1.39	0.00331	0.487
1	222817533	222817977	445	5.28	4.43	5.81	-1.37	0.00332	0.487
10	123109315	123109940	626	4.97	4.18	5.48	-1.31	0.00333	0.487
9	127987063	127987583	521	4.63	3.83	5.14	-1.3	0.00336	0.49
12	5177751	5178100	350	4.91	4.24	5.36	-1.13	0.00337	0.491
X	65705974	65706851	878	5.31	4.58	5.79	-1.21	0.00339	0.492
6	75830892	75831894	1003	4.92	4.18	5.41	-1.24	0.00339	0.492
3	8658166	8658765	600	4.81	3.99	5.33	-1.34	0.0034	0.492
14	23694175	23694896	722	3.99	3.12	4.53	-1.41	0.00341	0.493
12	49688046	49688382	337	4.34	3.59	4.83	-1.25	0.00342	0.493
9	14326409	14326742	334	4.69	3.92	5.19	-1.27	0.00343	0.494
9	95102013	95102490	478	5.08	4.22	5.62	-1.4	0.00344	0.494
17	77581443	77581911	469	5.22	4.45	5.72	-1.26	0.00345	0.495
5	141094424	141094964	541	4.73	3.91	5.25	-1.33	0.00347	0.495
3	36813337	36813825	489	4.89	4.14	5.39	-1.25	0.00347	0.495
2	64273659	64274308	650	4.83	4	5.35	-1.35	0.0035	0.498
20	13800688	13801180	493	4.79	4.04	5.28	-1.25	0.0035	0.498
5	142913774	142914352	579	4.75	3.99	5.25	-1.26	0.00351	0.498
2	160666297	160666731	435	4.48	3.51	5.05	-1.54	0.00352	0.498
3	124552216	124552636	421	4.55	3.77	5.05	-1.28	0.00353	0.498
4	8599680	8600027	348	4.55	3.65	5.09	-1.44	0.00353	0.498
21	37533167	37533711	545	4.97	4.24	5.45	-1.21	0.00353	0.499
1	100502136	100502747	612	5.66	4.93	6.14	-1.21	0.00355	0.5
6	118388125	118388755	631	4.76	3.94	5.27	-1.33	0.00357	0.501
3	185342550	185343194	645	4.59	3.73	5.12	-1.39	0.00358	0.501
14	34051949	34052332	384	4.89	4.01	5.43	-1.42	0.00359	0.501
15	48946070	48946530	461	4.16	3.19	4.74	-1.55	0.00359	0.501
8	120060666	120060979	314	4.18	3.16	4.78	-1.62	0.0036	0.501
8	108119896	108120763	868	6.31	5.48	6.83	-1.35	0.0036	0.501
8	97990001	97990650	650	5.46	4.67	5.97	-1.3	0.0036	0.501
3	155391498	155392056	559	4.89	4.16	5.37	-1.21	0.0036	0.501
4	83516039	83516705	667	4	3.12	4.55	-1.43	0.00361	0.502
5	26846918	26847661	744	5.54	4.9	5.99	-1.09	0.00362	0.502
10	96267163	96267686	524	4.92	4.11	5.43	-1.32	0.00365	0.505
6	3822879	3823448	570	4.7	3.96	5.19	-1.23	0.00366	0.505
5	37847763	37848258	496	4.86	4.09	5.36	-1.27	0.00366	0.505
1	182101311	182101950	640	5.29	4.57	5.78	-1.21	0.00366	0.505
16	22542717	22543252	536	4.76	4.08	5.21	-1.13	0.00368	0.505
10	5951094	5951733	640	3.98	3.01	4.56	-1.55	0.00368	0.505
21	43609686	43610267	582	4.44	3.67	4.94	-1.27	0.00369	0.505
3	182309154	182309569	416	4.04	3.2	4.57	-1.37	0.00369	0.505
1	33099229	33099946	718	6.99	6.15	7.52	-1.37	0.0037	0.505
1	56424931	56425582	652	4.47	3.7	4.97	-1.27	0.00373	0.508
2	30217690	30218283	594	4.99	4.19	5.5	-1.31	0.00375	0.509
21	45917312	45917634	323	4.43	3.72	4.91	-1.19	0.00375	0.509
5	10719659	10720398	740	6.66	5.93	7.15	-1.21	0.00375	0.509
1	75854983	75855464	482	5.65	4.73	6.21	-1.48	0.00376	0.509
1	162696310	162696827	518	5.51	4.73	6.01	-1.28	0.00376	0.509
6	35544776	35545537	762	5.74	5.09	6.18	-1.09	0.00378	0.51
16	50503911	50504436	526	4.48	3.61	5.01	-1.4	0.00379	0.51
3	124837734	124838195	462	5.2	4.4	5.72	-1.32	0.0038	0.51
12	122716726	122717046	321	4.73	3.98	5.22	-1.24	0.00381	0.51
12	6182983	6183385	403	5.54	4.79	6.03	-1.24	0.00381	0.51
5	84435748	84436291	544	5.56	4.81	6.05	-1.24	0.00382	0.511
3	32443477	32443863	387	4.36	3.49	4.9	-1.41	0.00384	0.511
5	36458953	36459805	853	6.08	5.35	6.56	-1.21	0.00385	0.511
2	61970861	61971574	714	5.28	4.46	5.8	-1.35	0.00385	0.511
1	167671559	167672297	739	5.85	5.2	6.29	-1.1	0.00385	0.511
22	42727344	42727816	473	4.97	4.26	5.45	-1.19	0.00386	0.511
2	105371185	105371655	471	3.98	3	4.56	-1.56	0.00386	0.511
3	17233257	17233685	429	4.6	3.68	5.16	-1.48	0.00387	0.511
13	49570070	49570580	511	4.2	3.44	4.7	-1.26	0.00389	0.514
18	70421951	70422512	562	4.64	3.82	5.16	-1.34	0.00391	0.514
11	93476553	93477222	670	5.07	4.34	5.55	-1.21	0.00392	0.514
3	177602525	177603418	894	6.86	6.07	7.37	-1.3	0.00394	0.514
12	106564709	106565338	630	4.22	3.43	4.73	-1.29	0.00394	0.514
2	174971880	174972849	970	5.44	4.62	5.96	-1.34	0.00394	0.514
6	11685402	11686140	739	4.48	3.48	5.07	-1.59	0.00395	0.514
1	226778609	226779060	452	4.86	4.01	5.39	-1.38	0.00397	0.516
8	97519451	97520127	677	4.63	3.88	5.13	-1.25	0.00398	0.516
1	152164789	152165151	363	4.8	4.03	5.3	-1.27	0.00399	0.516
2	11867995	11868400	406	4.87	4.04	5.39	-1.35	0.00399	0.516
8	101341636	101342420	785	6.34	5.57	6.84	-1.26	0.00399	0.516
8	118116371	118116633	263	4.52	3.65	5.06	-1.41	0.00401	0.518
16	14565247	14565817	571	4.01	3.12	4.55	-1.44	0.00403	0.518
9	70111623	70112275	653	5.66	5.04	6.09	-1.05	0.00403	0.518
5	36265344	36265927	584	4.31	3.4	4.87	-1.47	0.00403	0.518
5	31395507	31396217	711	5.3	4.6	5.78	-1.18	0.00403	0.518
12	75623583	75624221	639	5.94	5.19	6.43	-1.23	0.00406	0.52
14	93533242	93534088	847	7.05	6.2	7.59	-1.39	0.00406	0.52
12	13376985	13377495	511	4.51	3.76	4.99	-1.23	0.00408	0.52
5	133737844	133738174	331	4.05	3.17	4.6	-1.43	0.00409	0.52
2	58447654	58448428	775	4.32	3.36	4.89	-1.53	0.00411	0.522
1	111447078	111447599	522	4.84	4.08	5.33	-1.26	0.00411	0.522
6	33622820	33623264	445	5.45	4.74	5.93	-1.19	0.00413	0.523
14	65211425	65211857	433	4.57	3.78	5.07	-1.29	0.00414	0.524
2	119208693	119209377	685	6.22	5.45	6.72	-1.27	0.00416	0.525
6	125867448	125868021	574	5.03	4.13	5.58	-1.44	0.00416	0.525
7	72632700	72633370	671	5.08	4.31	5.58	-1.27	0.0042	0.528
11	74135103	74135498	396	4.54	3.67	5.08	-1.41	0.0042	0.528
5	133041186	133041665	480	4.65	3.95	5.12	-1.17	0.0042	0.528
3	149473647	149474058	412	4.75	4	5.24	-1.24	0.00421	0.528
15	32657507	32657815	309	4.53	3.74	5.03	-1.29	0.00422	0.529
1	44531911	44532529	619	6.45	5.61	6.98	-1.37	0.00423	0.529
1	61837583	61838263	681	5.09	4.22	5.63	-1.41	0.00423	0.529
15	91890380	91890973	594	5.91	5.23	6.36	-1.13	0.00424	0.529
5	39219430	39219808	379	4.09	3.16	4.65	-1.49	0.00427	0.532
3	111732299	111732710	412	5.07	4.33	5.56	-1.23	0.00428	0.532
2	100721701	100722255	555	4.42	3.61	4.94	-1.33	0.00429	0.532
3	50390595	50391324	730	5.61	4.98	6.04	-1.06	0.0043	0.533
16	57392752	57393276	525	4.99	4.29	5.46	-1.17	0.00431	0.533
15	98035635	98036019	385	4.06	3.18	4.6	-1.42	0.00433	0.534
8	119051450	119051880	431	4.14	3.32	4.66	-1.34	0.00436	0.537
12	67155486	67156349	864	5.41	4.6	5.92	-1.32	0.00437	0.538
7	80150903	80151684	782	5.4	4.66	5.89	-1.23	0.0044	0.54
5	37722822	37723271	450	5.15	4.47	5.61	-1.14	0.0044	0.54
7	17599751	17600702	952	6.06	5.18	6.6	-1.42	0.00442	0.541
10	79088141	79088586	446	5.48	4.74	5.96	-1.22	0.00442	0.541
8	81026348	81026875	528	5.73	5.07	6.18	-1.1	0.00445	0.542
5	122163209	122164038	830	4.44	3.68	4.94	-1.25	0.00448	0.545
13	34340517	34341047	531	4.17	3.32	4.7	-1.39	0.00452	0.549
4	4260247	4260702	456	4.35	3.63	4.83	-1.2	0.00454	0.55
10	124088010	124088711	702	5.7	5.11	6.11	-1.01	0.00455	0.551
19	15869069	15869556	488	4.89	4.02	5.44	-1.42	0.00456	0.551
16	53041609	53042099	491	6.2	5.43	6.7	-1.27	0.00457	0.551
3	53261642	53262131	490	4.65	3.87	5.15	-1.28	0.00457	0.551
8	8333475	8334324	850	5.97	5.25	6.46	-1.21	0.00459	0.552
5	82421168	82421563	396	4.6	3.88	5.08	-1.2	0.0046	0.553
8	91483813	91484462	650	4.51	3.59	5.07	-1.48	0.00462	0.555
2	46970428	46971221	794	5.41	4.69	5.9	-1.21	0.00463	0.556
2	42562379	42563249	871	5.16	4.48	5.62	-1.14	0.00466	0.558
1	88061116	88061831	716	5.13	4.37	5.62	-1.25	0.00467	0.558
1	147225153	147225760	608	4.43	3.59	4.96	-1.37	0.0047	0.56
5	125394627	125395159	533	4.37	3.5	4.91	-1.41	0.0047	0.56
3	69914313	69914809	497	4.52	3.61	5.08	-1.47	0.00472	0.561
2	68936390	68937281	892	5.33	4.61	5.81	-1.2	0.00473	0.561
17	72249055	72249808	754	4.94	4.07	5.48	-1.4	0.00475	0.562
3	134675621	134676130	510	4.2	3.37	4.73	-1.36	0.00475	0.562
11	121257955	121258376	422	4.17	3.29	4.72	-1.43	0.00475	0.562
8	8600645	8601327	683	4.43	3.63	4.94	-1.31	0.00477	0.562
9	114472829	114473154	326	4.16	3.39	4.66	-1.27	0.00479	0.564
6	87118043	87118438	396	4.82	4.1	5.3	-1.21	0.00482	0.566
1	87805805	87806467	663	4.66	3.97	5.13	-1.16	0.00482	0.566
1	58824902	58825408	507	5.01	4.21	5.52	-1.3	0.00484	0.567
5	35430499	35431199	701	4.7	4	5.16	-1.17	0.00484	0.567
6	35391953	35392754	802	6.39	5.73	6.84	-1.12	0.00487	0.569
12	75781322	75782076	755	5.71	4.88	6.24	-1.35	0.00488	0.569
1	168907064	168907514	451	4.09	3.14	4.66	-1.52	0.00489	0.571
X	18702625	18703238	614	4.75	4.02	5.23	-1.21	0.0049	0.571
3	42376329	42376822	494	4.24	3.38	4.78	-1.4	0.00492	0.571
12	6226583	6227008	426	5.37	4.62	5.85	-1.23	0.00493	0.571
5	37495676	37496440	765	4.54	3.82	5.02	-1.2	0.00494	0.571
13	42497806	42498213	408	3.99	3.17	4.52	-1.35	0.00494	0.571
3	99285992	99286690	699	4.18	3.39	4.69	-1.29	0.00496	0.572
16	47732485	47733165	681	5.72	4.99	6.21	-1.22	0.00497	0.572
3	26281245	26281851	607	4.24	3.49	4.74	-1.25	0.00498	0.572
6	79671599	79672198	600	4.47	3.69	4.97	-1.28	0.00498	0.572
6	43737326	43738074	749	6.83	6.04	7.34	-1.3	0.00498	0.572
1	222489475	222489967	493	5.33	4.54	5.83	-1.29	0.00501	0.572
1	158037638	158038323	686	5.14	4.54	5.56	-1.03	0.00502	0.572
13	29702866	29703493	628	5.31	4.49	5.83	-1.34	0.00503	0.572
21	41535974	41536702	729	4.33	3.61	4.8	-1.19	0.00504	0.572
22	10687179	10687699	521	5.69	5.11	6.1	-0.99	0.00504	0.572
11	88544318	88544840	523	4.8	4.07	5.29	-1.21	0.00504	0.572
16	67268146	67268609	464	4.81	4.06	5.31	-1.24	0.00504	0.572
9	122810330	122810736	407	4.27	3.49	4.78	-1.28	0.00504	0.572
6	71404673	71405139	467	4.41	3.59	4.93	-1.34	0.00506	0.572
10	49037204	49037658	455	4.79	3.9	5.34	-1.44	0.00508	0.572
14	92644147	92644548	402	6.6	5.96	7.04	-1.08	0.00508	0.572
13	97122425	97122921	497	4.54	3.78	5.03	-1.25	0.00508	0.572
17	73308322	73308758	437	5.95	5.32	6.39	-1.07	0.00508	0.572
14	88698259	88699216	958	5.53	4.79	6.01	-1.22	0.00508	0.572
3	163670987	163671560	574	4.37	3.64	4.84	-1.2	0.00508	0.572
16	74997987	74998364	378	4.95	4.22	5.43	-1.22	0.00511	0.573
10	33365632	33366404	773	5.15	4.4	5.64	-1.24	0.00512	0.573
15	93837366	93837836	471	4.04	3.2	4.57	-1.37	0.00512	0.573
3	108006144	108006742	599	6.24	5.45	6.75	-1.3	0.00512	0.573
16	33958045	33958730	686	4.04	3.19	4.57	-1.38	0.00515	0.575
16	10308426	10309103	678	5.65	4.82	6.17	-1.35	0.00515	0.575
8	118849879	118850495	617	5.34	4.72	5.78	-1.05	0.0052	0.578
17	83073327	83074046	720	7.45	6.73	7.93	-1.21	0.00521	0.578
2	173667125	173667766	642	4.3	3.53	4.8	-1.27	0.00521	0.578
14	84465743	84466625	883	6.09	5.46	6.53	-1.07	0.00522	0.578
10	77393844	77394280	437	4.91	4.28	5.34	-1.06	0.00523	0.578
2	46846989	46847543	555	4.71	4.01	5.17	-1.17	0.00523	0.578
1	116621815	116622162	348	4.38	3.57	4.89	-1.32	0.00524	0.578
8	6338639	6339386	748	5.17	4.41	5.66	-1.25	0.00524	0.578
17	31269557	31270067	511	5.09	4.44	5.54	-1.09	0.00525	0.579
7	116780794	116781375	582	5.3	4.64	5.75	-1.12	0.00526	0.579
15	76197734	76198061	328	5.16	4.56	5.58	-1.02	0.00527	0.579
6	109892990	109893395	406	4.72	4.01	5.2	-1.19	0.00528	0.579
11	79418883	79419590	708	5.91	5.26	6.36	-1.11	0.00528	0.579
1	112700820	112701104	285	5.77	5.12	6.21	-1.09	0.00531	0.582
3	11036682	11037219	538	4.15	3.32	4.67	-1.35	0.00532	0.582
8	117615345	117615650	306	4.76	3.99	5.25	-1.27	0.00533	0.582
4	56757569	56758261	693	4.47	3.6	5.01	-1.41	0.00534	0.582
15	36392645	36393223	579	5.33	4.5	5.85	-1.35	0.00535	0.582
15	21111862	21112712	851	5.01	4.29	5.49	-1.2	0.00535	0.582
5	40853517	40854289	773	4.53	3.88	4.98	-1.1	0.00536	0.582
11	120055512	120056055	544	5.29	4.54	5.78	-1.25	0.00536	0.582
16	61457681	61458073	393	4.12	3.14	4.69	-1.55	0.00537	0.582
2	110049690	110050238	549	4.92	4.25	5.38	-1.13	0.00537	0.582
3	123143498	123144418	921	5.57	4.98	5.99	-1	0.0054	0.584
20	11850345	11850717	373	4.08	3.2	4.62	-1.41	0.0054	0.584
11	119865633	119866385	753	6	5.31	6.46	-1.15	0.00542	0.584
3	188294908	188295472	565	5.2	4.46	5.68	-1.23	0.00542	0.584
2	129056275	129057002	728	5.88	5.19	6.35	-1.15	0.00543	0.584
3	37181758	37182148	391	4.87	4.01	5.41	-1.4	0.00543	0.584
12	96811039	96811508	470	4.47	3.63	5	-1.37	0.00545	0.584
10	50374931	50375421	491	4.42	3.54	4.96	-1.42	0.00546	0.584
2	6922426	6923036	611	4.84	4.11	5.32	-1.21	0.00546	0.584
2	26274096	26274592	497	4.35	3.57	4.85	-1.27	0.00546	0.584
13	110094529	110095236	708	5.85	5.12	6.33	-1.21	0.00548	0.584
4	86935795	86936391	597	5.45	4.79	5.9	-1.11	0.00548	0.584
5	54742420	54742932	513	4.15	3.33	4.66	-1.34	0.0055	0.584
7	134368863	134369485	623	4.77	3.91	5.31	-1.41	0.0055	0.584
5	124740911	124741321	411	4.18	3.19	4.76	-1.57	0.0055	0.584
6	123118695	123119218	524	4.81	3.97	5.34	-1.37	0.00551	0.584
11	71425417	71426248	832	5.88	5.1	6.39	-1.29	0.00551	0.584
11	61377142	61377701	560	4.34	3.55	4.85	-1.31	0.00554	0.586
20	3094998	3095629	632	4.66	3.96	5.13	-1.17	0.00557	0.588
3	38999935	39000464	530	4.01	3.14	4.55	-1.41	0.0056	0.589
11	126405323	126405677	355	4.88	4.26	5.31	-1.05	0.0056	0.589
1	231278948	231279573	626	4.41	3.7	4.89	-1.19	0.0056	0.589
7	50953863	50954220	358	4.23	3.39	4.76	-1.37	0.00561	0.589
6	4913696	4914178	483	4.64	3.96	5.1	-1.14	0.00562	0.589
10	124393992	124394314	323	4.31	3.56	4.81	-1.25	0.00562	0.589
5	151637717	151638114	398	4.21	3.46	4.7	-1.24	0.00563	0.589
12	24487836	24488547	712	4.88	4.18	5.36	-1.18	0.00566	0.591
9	6229962	6230736	775	4.85	4.2	5.29	-1.09	0.00567	0.591
22	41838810	41839245	436	5.89	5.26	6.33	-1.07	0.00567	0.591
5	160287555	160287950	396	4.12	3.38	4.61	-1.23	0.00568	0.591
16	70746176	70747068	893	7.07	6.38	7.53	-1.15	0.0057	0.591
11	129315440	129316409	970	6.7	5.98	7.19	-1.21	0.0057	0.591
16	719870	720166	297	5.86	5.27	6.27	-1.01	0.00571	0.591
2	25311016	25311840	825	6.08	5.45	6.52	-1.07	0.00571	0.591
13	20405664	20406098	435	4.58	3.85	5.06	-1.21	0.00571	0.591
3	50264485	50265387	903	7.03	6.33	7.51	-1.18	0.00573	0.591
6	39185019	39185672	654	5.41	4.76	5.86	-1.11	0.00574	0.591
6	37071599	37072317	719	6.2	5.42	6.7	-1.28	0.00576	0.591
12	5379710	5380435	726	6.94	6.2	7.42	-1.22	0.00576	0.591
1	29239124	29239618	495	5.44	4.69	5.93	-1.24	0.00577	0.591
15	38702439	38703020	582	5.08	4.29	5.59	-1.31	0.00577	0.591
16	57988881	57989342	462	6.1	5.34	6.59	-1.25	0.00578	0.591
3	97914420	97914741	322	4.23	3.44	4.74	-1.3	0.00578	0.591
13	98507029	98507772	744	4.94	4.26	5.4	-1.13	0.0058	0.591
6	42118173	42118889	717	7.31	6.5	7.83	-1.33	0.00582	0.592
6	113359597	113360266	670	4.9	4.17	5.37	-1.2	0.00584	0.593
10	114279769	114280212	444	4.54	3.82	5.02	-1.19	0.00584	0.593
21	30408673	30409205	533	4.15	3.23	4.7	-1.47	0.00587	0.594
7	69762756	69763303	548	4.36	3.52	4.89	-1.37	0.0059	0.595
8	115451843	115452414	572	4.12	3.2	4.68	-1.48	0.00593	0.595
15	91953233	91953931	699	6.36	5.72	6.8	-1.09	0.00594	0.595
8	116350773	116351815	1043	5.68	4.99	6.15	-1.16	0.00594	0.595
17	76787862	76788264	403	4.09	3.24	4.63	-1.39	0.00595	0.595
17	43842058	43843008	951	8.23	7.38	8.77	-1.39	0.00596	0.595
8	8270441	8270809	369	4.06	3.22	4.59	-1.37	0.00596	0.595
2	164991615	164992287	673	4.81	4.15	5.25	-1.1	0.00596	0.595
3	9422699	9423459	761	5.45	4.6	5.98	-1.38	0.00596	0.595
7	44702022	44702462	441	4.99	4.28	5.47	-1.19	0.00597	0.595
12	30026649	30027276	628	4.27	3.51	4.76	-1.25	0.00597	0.595
7	140059252	140059782	531	5.38	4.79	5.8	-1.01	0.00598	0.595
11	77020212	77020599	388	4.32	3.42	4.88	-1.45	0.006	0.596
9	66266250	66266631	382	4.5	3.72	5.01	-1.28	0.006	0.596
15	64019745	64020121	377	4.68	3.87	5.2	-1.33	0.006	0.596
9	4666109	4666608	500	5.8	5.09	6.27	-1.19	0.00601	0.596
19	4131059	4132115	1057	5.41	4.68	5.89	-1.21	0.00601	0.596
1	209542436	209543034	599	6.58	5.79	7.09	-1.3	0.00603	0.596
10	53029975	53030756	782	4.56	3.83	5.04	-1.21	0.00604	0.596
12	1115453	1116453	1001	6.29	5.42	6.83	-1.41	0.00604	0.596
3	192727312	192728044	733	5.42	4.64	5.92	-1.28	0.00605	0.596
6	108835260	108835615	356	4.29	3.43	4.83	-1.4	0.00605	0.596
12	47896664	47897092	429	5.97	5.2	6.47	-1.27	0.00606	0.596
17	59362270	59362720	451	4.19	3.41	4.7	-1.29	0.00612	0.599
10	106577289	106577858	570	4.96	4.2	5.46	-1.25	0.00612	0.599
20	34922672	34922927	256	4.08	3.21	4.61	-1.4	0.00613	0.599
3	9314598	9315484	887	4.78	4.14	5.23	-1.09	0.00614	0.599
11	80699604	80700413	810	5.85	5.17	6.31	-1.13	0.00614	0.599
11	73334352	73335167	816	5.29	4.7	5.71	-1.01	0.00615	0.599
7	156836478	156836879	402	3.98	3.12	4.52	-1.39	0.00616	0.599
19	555931	556520	590	5.61	4.92	6.07	-1.15	0.00616	0.599
3	144323698	144324530	833	4.73	4.11	5.17	-1.06	0.00616	0.599
2	102488050	102488596	547	5.06	4.27	5.57	-1.31	0.00616	0.599
6	45613698	45614160	463	5.26	4.44	5.78	-1.34	0.00617	0.599
18	22913695	22914248	554	6.45	5.65	6.95	-1.3	0.00621	0.6
2	23651234	23651609	376	4.07	3.16	4.62	-1.46	0.00622	0.6
9	6828980	6829410	431	5.45	4.85	5.87	-1.02	0.00623	0.6
5	96780742	96782169	1428	4.8	4.01	5.31	-1.3	0.00623	0.6
5	96247221	96248067	847	4.55	3.81	5.04	-1.23	0.00624	0.6
6	158031319	158031785	467	5.21	4.49	5.69	-1.2	0.00626	0.602
3	4741576	4742173	598	5.22	4.62	5.65	-1.02	0.00626	0.602
5	38465990	38466792	803	6.85	6.1	7.34	-1.24	0.00632	0.605
X	121036799	121037450	652	4.37	3.56	4.89	-1.34	0.00633	0.605
15	99536408	99537087	680	4.22	3.35	4.76	-1.41	0.00633	0.605
3	175743561	175744280	720	4.51	3.7	5.03	-1.33	0.00635	0.605
16	79049820	79050590	771	4.78	4.1	5.25	-1.15	0.00636	0.605
8	119222546	119223397	852	5.49	4.85	5.93	-1.08	0.00636	0.605
X	132737702	132738239	538	5.23	4.56	5.69	-1.13	0.00636	0.605
3	150232893	150233402	510	4.9	4.28	5.34	-1.05	0.00637	0.605
2	172408196	172408884	689	5.65	4.97	6.12	-1.15	0.00637	0.605
1	211603303	211603860	558	5.37	4.68	5.84	-1.16	0.00637	0.605
2	138421709	138422227	519	4	3.19	4.52	-1.33	0.00638	0.605
16	38725	39546	822	5.82	5.18	6.25	-1.07	0.00638	0.605
11	57679307	57680025	719	6.25	5.5	6.75	-1.25	0.00641	0.606
5	178461115	178461483	369	4.18	3.4	4.68	-1.28	0.00642	0.606
21	36188038	36188684	647	5.33	4.66	5.79	-1.13	0.00644	0.606
16	84332022	84332387	366	4.59	3.79	5.09	-1.3	0.00644	0.606
12	43906239	43907244	1006	5.02	4.36	5.47	-1.11	0.00645	0.606
10	113895031	113895469	439	4.14	3.29	4.66	-1.37	0.00645	0.606
13	49301184	49301511	328	4.29	3.55	4.78	-1.23	0.00646	0.606
7	75050564	75050994	431	4.84	4.17	5.29	-1.12	0.00648	0.606
8	133724948	133725528	581	6.13	5.53	6.55	-1.02	0.00648	0.606
2	171579457	171580056	600	4.5	3.78	4.97	-1.19	0.0065	0.606
2	176582950	176583828	879	4.62	3.78	5.14	-1.36	0.00652	0.606
13	19794279	19795072	794	5.25	4.6	5.7	-1.11	0.00652	0.606
7	126588935	126589844	910	5.51	4.91	5.93	-1.03	0.00654	0.606
10	50604920	50605898	979	5.07	4.26	5.58	-1.32	0.00654	0.606
7	99254397	99254808	412	4.88	4.16	5.36	-1.19	0.00654	0.606
10	77505832	77506333	502	4.83	4.16	5.28	-1.12	0.00655	0.607
8	108715163	108715625	463	4.29	3.36	4.85	-1.49	0.00658	0.607
4	154165060	154165906	847	5.42	4.66	5.91	-1.24	0.00658	0.607
14	52131637	52132213	577	4.97	4.38	5.39	-1.01	0.00658	0.607
10	4704018	4704606	589	4.83	4.07	5.32	-1.25	0.00659	0.607
3	150751835	150752300	466	4.85	4.12	5.34	-1.22	0.00659	0.607
5	37941002	37941666	665	5.42	4.73	5.88	-1.16	0.00662	0.608
13	82627220	82627656	437	4.12	3.15	4.69	-1.54	0.00662	0.609
9	10649013	10649470	458	4.91	4.24	5.37	-1.14	0.00663	0.609
17	81502486	81502841	356	5.52	4.97	5.91	-0.94	0.00665	0.609
2	38690465	38691197	733	5.16	4.41	5.64	-1.23	0.00667	0.609
14	40393065	40393982	918	4.63	3.83	5.14	-1.31	0.00668	0.609
5	18745000	18745781	782	5.33	4.61	5.81	-1.2	0.00669	0.609
5	36462364	36462834	471	4.54	3.82	5.02	-1.2	0.00669	0.609
8	103275245	103275621	377	5.25	4.62	5.68	-1.05	0.00669	0.609
4	168600758	168601451	694	3.98	2.94	4.58	-1.64	0.0067	0.609
2	26770912	26771498	587	5.87	5.14	6.35	-1.21	0.0067	0.609
6	155201684	155202421	738	4.34	3.6	4.82	-1.22	0.00672	0.609
8	128428112	128428536	425	4.1	3.29	4.62	-1.33	0.00673	0.609
2	173893042	173893547	506	4.32	3.46	4.85	-1.39	0.00674	0.609
14	73227984	73228847	864	6.95	6.29	7.41	-1.11	0.00675	0.609
16	80718429	80718971	543	5.27	4.64	5.71	-1.08	0.00676	0.609
1	8258883	8259710	828	4.33	3.47	4.87	-1.4	0.00677	0.609
8	55219096	55219526	431	4.39	3.58	4.9	-1.33	0.00677	0.609
3	98013529	98014251	723	5.79	5.09	6.25	-1.16	0.00679	0.609
1	181469527	181470177	651	5.34	4.65	5.8	-1.15	0.0068	0.609
8	118227325	118227983	659	5.57	4.92	6.02	-1.1	0.00681	0.609
16	18988891	18989637	747	6.02	5.36	6.47	-1.11	0.00682	0.609
17	74193093	74193393	301	4.24	3.49	4.73	-1.24	0.00683	0.609
12	107379638	107380677	1040	5.28	4.59	5.75	-1.16	0.00684	0.609
1	91091656	91092165	510	4.28	3.48	4.8	-1.32	0.00684	0.609
4	75181042	75181548	507	4.09	3.15	4.66	-1.51	0.00685	0.609
1	52662567	52663204	638	6.67	5.92	7.17	-1.25	0.00685	0.609
6	77292463	77293639	1177	5.42	4.63	5.93	-1.3	0.00687	0.61
20	5397355	5397895	541	4.34	3.45	4.89	-1.44	0.00689	0.61
5	38636654	38636972	319	5.14	4.48	5.59	-1.11	0.00689	0.61
X	126109349	126110211	863	5	4.38	5.43	-1.06	0.00692	0.611
2	74917769	74918133	365	4.9	4.25	5.35	-1.1	0.00692	0.611
9	36074822	36075252	431	4.16	3.25	4.71	-1.46	0.00693	0.611
14	74647616	74648452	837	7.2	6.52	7.65	-1.13	0.00695	0.611
10	60473558	60474128	571	4.94	4.22	5.42	-1.19	0.00696	0.611
18	61952236	61952913	678	5.05	4.36	5.51	-1.16	0.00696	0.611
22	50303832	50304560	729	6.06	5.38	6.51	-1.13	0.00696	0.611
X	121336923	121337389	467	4.14	3.24	4.69	-1.45	0.00698	0.612
2	191041613	191042210	598	5.6	4.99	6.03	-1.04	0.00698	0.612
5	44807266	44807545	280	4.28	3.47	4.79	-1.32	0.00704	0.616
9	134329969	134330306	338	6.28	5.63	6.72	-1.1	0.00707	0.617
5	36452323	36452797	475	5.44	4.71	5.93	-1.22	0.00709	0.617
14	39393291	39393682	392	4.68	3.9	5.18	-1.28	0.00709	0.617
1	38588944	38589859	916	6.64	5.98	7.09	-1.11	0.00709	0.617
5	14739542	14739830	289	4.11	3.31	4.62	-1.3	0.00711	0.618
2	234368764	234369248	485	4.3	3.5	4.82	-1.32	0.00713	0.619
8	128035067	128035637	571	6.53	5.91	6.96	-1.05	0.00713	0.619
6	101083443	101083964	522	4.68	3.96	5.16	-1.19	0.00714	0.619
4	7213827	7214152	326	4.57	3.93	5.01	-1.07	0.00716	0.62
X	74453100	74453539	440	4.07	3.15	4.63	-1.48	0.00718	0.621
12	31757031	31757378	348	4.08	3.28	4.59	-1.32	0.0072	0.622
1	47030797	47031443	647	4.11	3.18	4.68	-1.5	0.00723	0.623
4	141458496	141458937	442	4.5	3.67	5.03	-1.36	0.00724	0.623
3	53155686	53156119	434	5.81	5.09	6.28	-1.19	0.00725	0.623
7	144407263	144407876	614	4.86	4.1	5.36	-1.26	0.00725	0.623
12	120055236	120055578	343	4.26	3.51	4.75	-1.23	0.00727	0.624
1	14733060	14733716	657	4.97	4.31	5.43	-1.12	0.00734	0.629
4	1783578	1784313	736	6.25	5.6	6.7	-1.1	0.00735	0.629
2	224971164	224971647	484	5.58	4.82	6.08	-1.26	0.00736	0.629
3	169085332	169086210	879	4.7	3.98	5.18	-1.21	0.00736	0.629
22	24578364	24579222	859	5.41	4.81	5.84	-1.03	0.00736	0.629
16	53080584	53081027	444	5.24	4.57	5.7	-1.13	0.00742	0.629
14	21887373	21887861	489	4.27	3.47	4.78	-1.31	0.00742	0.629
2	119255907	119256332	426	4.6	3.87	5.08	-1.21	0.00742	0.629
12	11885131	11885845	715	6.29	5.62	6.74	-1.12	0.00743	0.629
4	82394837	82395308	472	5.33	4.65	5.78	-1.14	0.00745	0.629
3	172722415	172723116	702	5.82	5.14	6.28	-1.15	0.00745	0.629
14	74488827	74489210	384	5.91	5.28	6.34	-1.06	0.00745	0.629
19	2059660	2060254	595	6.68	6.02	7.13	-1.11	0.00745	0.629
18	31198937	31199749	813	4.16	3.37	4.67	-1.3	0.00746	0.629
1	225625396	225625853	458	4.05	3.25	4.55	-1.3	0.00746	0.629
7	142104619	142105413	795	5.04	4.38	5.49	-1.1	0.00746	0.629
X	73876951	73877317	367	4.13	3.29	4.66	-1.37	0.00747	0.629
3	113536575	113537073	499	4.87	4.08	5.37	-1.29	0.00747	0.629
16	78210244	78210700	457	5.18	4.45	5.67	-1.22	0.0075	0.631
11	112656944	112657419	476	4.42	3.7	4.9	-1.21	0.00751	0.631
5	18746085	18746596	512	5.16	4.43	5.64	-1.2	0.00751	0.631
10	118793456	118794034	579	4.48	3.73	4.97	-1.25	0.00755	0.631
1	200302194	200303090	897	4.96	4.29	5.41	-1.12	0.00755	0.631
1	164771640	164772035	396	4.64	3.9	5.13	-1.24	0.00755	0.631
7	106858866	106859647	782	4.96	4.27	5.43	-1.15	0.00757	0.631
5	37926789	37927346	558	4.25	3.58	4.71	-1.13	0.00757	0.631
4	122798093	122798532	440	4.96	4.27	5.43	-1.16	0.00759	0.632
7	6019751	6020171	421	4.38	3.46	4.93	-1.48	0.0076	0.632
10	44112053	44112876	824	4.4	3.72	4.86	-1.14	0.00762	0.632
7	138864730	138865056	327	4.03	3.27	4.52	-1.25	0.00762	0.632
5	36450360	36450953	594	4.87	4.12	5.36	-1.24	0.00762	0.632
7	93558753	93559526	774	4.92	4.31	5.36	-1.05	0.00762	0.632
16	31877398	31877765	368	5.07	4.39	5.53	-1.14	0.00766	0.634
8	48253657	48254402	746	4.38	3.73	4.83	-1.1	0.00768	0.634
16	72987445	72987926	482	5.48	4.81	5.93	-1.12	0.00768	0.634
2	113818392	113818937	546	4.89	4.15	5.37	-1.22	0.00772	0.634
1	63920371	63921087	717	4.98	4.23	5.47	-1.24	0.00772	0.634
8	118142510	118143150	641	6.74	6.02	7.22	-1.2	0.00773	0.634
3	156317435	156317873	439	4.04	3.27	4.54	-1.27	0.00773	0.634
10	5488271	5489164	894	6.46	5.84	6.9	-1.07	0.00773	0.634
3	129053484	129054056	573	5.09	4.43	5.54	-1.1	0.00777	0.636
5	172443428	172443823	396	4.86	4.12	5.34	-1.22	0.00779	0.637
3	178778401	178778998	598	4.58	3.89	5.05	-1.16	0.00779	0.637
1	85224846	85225590	745	4.52	3.69	5.04	-1.35	0.00782	0.638
7	96135200	96135756	557	4.19	3.33	4.72	-1.39	0.00783	0.638
6	129318306	129318784	479	4.76	3.9	5.3	-1.4	0.00786	0.639
X	37644335	37645203	869	5.11	4.38	5.59	-1.21	0.00787	0.64
21	45034542	45035022	481	4.17	3.45	4.65	-1.19	0.00789	0.64
8	73346171	73346909	739	5.59	5	6.01	-1.01	0.0079	0.64
7	144416207	144416678	472	4.52	3.77	5.02	-1.25	0.0079	0.64
2	222805403	222805974	572	4.6	3.89	5.07	-1.18	0.0079	0.64
4	123587970	123588837	868	5.52	4.7	6.03	-1.33	0.00793	0.641
7	913964	914988	1025	7.46	6.76	7.94	-1.18	0.00795	0.642
7	4006712	4007463	752	4.31	3.61	4.78	-1.18	0.00796	0.642
2	118249348	118250015	668	4.28	3.53	4.77	-1.24	0.00797	0.642
20	40563395	40563723	329	5	4.25	5.49	-1.24	0.00798	0.642
1	226814994	226815638	645	6.57	5.86	7.05	-1.2	0.00798	0.642
8	69903611	69904175	565	4.2	3.37	4.72	-1.34	0.00801	0.642
8	96147019	96147460	442	5.53	4.93	5.95	-1.02	0.00801	0.642
1	174875268	174875664	397	5.17	4.44	5.65	-1.21	0.00804	0.643
7	67043029	67043776	748	4.84	4.13	5.32	-1.19	0.00805	0.643
1	159091272	159092073	802	5.28	4.64	5.73	-1.09	0.00806	0.643
2	67322459	67322994	536	4.75	4.02	5.23	-1.21	0.00807	0.643
1	44546021	44546352	332	4.78	4.18	5.21	-1.03	0.00813	0.644
2	28661768	28662512	745	4.33	3.51	4.84	-1.33	0.00814	0.644
1	152029185	152029545	361	4.45	3.67	4.95	-1.29	0.00815	0.644
5	111453608	111454079	472	4.72	4	5.19	-1.19	0.00818	0.644
14	77045539	77046166	628	5.76	5.16	6.18	-1.01	0.00819	0.644
18	35456197	35456914	718	5.17	4.5	5.62	-1.11	0.00819	0.644
3	141477103	141477657	555	5.69	5.1	6.11	-1.01	0.00819	0.644
15	94206376	94207176	801	5.09	4.47	5.52	-1.05	0.0082	0.644
6	42192471	42192771	301	4.38	3.67	4.86	-1.19	0.00821	0.644
6	167750950	167751392	443	4.6	3.96	5.04	-1.08	0.00821	0.644
6	156427291	156427746	456	4.04	3.22	4.56	-1.34	0.00822	0.644
2	163778150	163778873	724	4.2	3.29	4.75	-1.46	0.00823	0.644
3	139601090	139601934	845	5.67	5.04	6.11	-1.07	0.00823	0.644
2	6877488	6878203	716	4.38	3.71	4.83	-1.12	0.00823	0.644
11	73931240	73931683	444	4.56	3.76	5.07	-1.3	0.00823	0.644
15	98165798	98166245	448	4.99	4.34	5.44	-1.1	0.00823	0.644
15	42679237	42679833	597	5.32	4.65	5.77	-1.13	0.00824	0.644
16	66660686	66661207	522	6.32	5.62	6.78	-1.16	0.00826	0.644
6	36121024	36121502	479	4.5	3.86	4.95	-1.09	0.00826	0.644
10	8702635	8703344	710	4.57	3.77	5.08	-1.31	0.00829	0.646
10	79127088	79127983	896	7.29	6.57	7.77	-1.2	0.0083	0.646
20	50689754	50690255	502	4.55	3.9	4.99	-1.09	0.00834	0.647
1	213070423	213070809	387	4.17	3.38	4.68	-1.3	0.00837	0.647
11	47930987	47931502	516	4.51	3.77	4.99	-1.22	0.00837	0.647
9	5644481	5644873	393	4.35	3.67	4.81	-1.14	0.00837	0.647
6	18488409	18488931	523	4.74	4.07	5.19	-1.12	0.00839	0.647
11	71589207	71589828	622	5.54	4.78	6.04	-1.26	0.0084	0.647
7	121102514	121103047	534	4.2	3.23	4.78	-1.55	0.0084	0.647
1	168457173	168457652	480	4.3	3.56	4.79	-1.24	0.00843	0.647
16	70697036	70697447	412	6.33	5.71	6.76	-1.05	0.00843	0.647
11	78037086	78037501	416	4.2	3.41	4.71	-1.31	0.00844	0.647
1	223429198	223429866	669	4.47	3.79	4.93	-1.14	0.00845	0.647
10	51946797	51947768	972	5.19	4.63	5.59	-0.96	0.00845	0.647
12	116402110	116402682	573	4.75	4.05	5.22	-1.17	0.00845	0.647
12	45660360	45660713	354	4.38	3.71	4.83	-1.12	0.00845	0.647
6	29702085	29702769	685	4.23	3.52	4.7	-1.18	0.00847	0.648
1	108016377	108017212	836	4.94	4.29	5.38	-1.1	0.00849	0.648
X	3363014	3363469	456	4.24	3.47	4.73	-1.26	0.0085	0.648
15	33201791	33202248	458	5.33	4.57	5.82	-1.25	0.0085	0.648
11	67033742	67034047	306	5.17	4.56	5.6	-1.04	0.00852	0.648
6	110528154	110528949	796	5.36	4.61	5.85	-1.23	0.00852	0.648
16	56919249	56919905	657	5.21	4.58	5.65	-1.07	0.00852	0.648
13	27808851	27809441	591	4.33	3.59	4.81	-1.22	0.00854	0.649
15	42156349	42156773	425	4.46	3.75	4.93	-1.18	0.00859	0.652
1	201549360	201549903	544	5.01	4.24	5.5	-1.26	0.0086	0.652
5	68295771	68296173	403	3.99	3.17	4.5	-1.33	0.00861	0.653
5	155403004	155403798	795	6.67	5.95	7.14	-1.19	0.00862	0.653
8	127800723	127801649	927	6.33	5.77	6.74	-0.97	0.00863	0.653
3	149625417	149626068	652	4.9	4.21	5.37	-1.16	0.00868	0.653
15	74807981	74808808	828	6.26	5.54	6.74	-1.2	0.00868	0.653
3	27677490	27678122	633	5.51	4.81	5.99	-1.18	0.00869	0.653
16	11016799	11017320	522	4.91	4.26	5.36	-1.11	0.0087	0.653
8	49171882	49172419	538	4.36	3.63	4.84	-1.21	0.0087	0.653
16	28587410	28587748	339	4.79	4.2	5.2	-1	0.00871	0.653
2	137508723	137509230	508	4.88	4.27	5.3	-1.04	0.00872	0.653
19	48290433	48291568	1136	5.59	5.06	5.97	-0.91	0.00873	0.653
3	103157994	103158607	614	3.98	3.21	4.48	-1.28	0.00874	0.653
19	18380137	18380737	601	5.65	4.98	6.11	-1.12	0.00875	0.653
20	24102193	24103120	928	5.13	4.54	5.55	-1.01	0.00877	0.653
1	69947883	69948208	326	4.37	3.65	4.85	-1.2	0.00877	0.653
8	60807742	60808191	450	5.01	4.31	5.47	-1.16	0.00877	0.653
11	46553746	46554447	702	5.12	4.46	5.57	-1.11	0.00878	0.653
3	147699098	147699680	583	4.01	3.05	4.59	-1.54	0.00878	0.653
10	70867018	70867555	538	4.58	3.83	5.07	-1.24	0.00878	0.653
16	80726925	80727820	896	5.9	5.31	6.32	-1.01	0.0088	0.653
16	15998325	15998756	432	4.51	3.86	4.95	-1.09	0.00881	0.653
8	131288529	131289229	701	4.84	4.23	5.27	-1.04	0.00881	0.653
5	157912528	157913333	806	6.21	5.45	6.71	-1.26	0.00882	0.653
6	69894533	69894924	392	4.17	3.33	4.69	-1.36	0.00883	0.653
11	92707088	92707680	593	5.28	4.58	5.76	-1.18	0.00884	0.653
17	79988106	79988533	428	5.44	4.85	5.86	-1	0.00885	0.653
X	53263012	53264031	1020	5.3	4.62	5.77	-1.15	0.00886	0.653
2	105617749	105618279	531	4.52	3.86	4.97	-1.11	0.00887	0.653
18	45617279	45617784	506	4.62	3.96	5.08	-1.12	0.00887	0.653
8	100567336	100567810	475	5.49	4.83	5.94	-1.12	0.00889	0.653
3	24047960	24048406	447	4.75	3.91	5.27	-1.36	0.00889	0.653
2	9249379	9249922	544	4.5	3.84	4.95	-1.1	0.00891	0.654
1	99621361	99622085	725	4.8	4.14	5.24	-1.1	0.00892	0.654
2	122236195	122236903	709	4.42	3.69	4.91	-1.22	0.00896	0.657
2	174395399	174396277	879	4.99	4.32	5.45	-1.13	0.00897	0.657
14	87877600	87878326	727	5.63	5.06	6.04	-0.98	0.00899	0.658
12	106112157	106112871	715	4.8	4.14	5.25	-1.12	0.009	0.658
8	114846626	114846946	321	4.55	3.87	5.01	-1.14	0.00901	0.658
14	72615422	72615982	561	6.61	5.93	7.07	-1.14	0.00902	0.658
10	5496373	5497420	1048	6.02	5.41	6.45	-1.05	0.00904	0.659
2	73244030	73244568	539	5.65	4.94	6.12	-1.18	0.00907	0.66
5	31408821	31409217	397	4.85	4.16	5.32	-1.17	0.00907	0.66
14	21915883	21916194	312	4.14	3.31	4.66	-1.35	0.00907	0.66
10	35783039	35783911	873	4.61	3.82	5.12	-1.3	0.00909	0.66
3	183291608	183292061	454	4.81	4.15	5.27	-1.12	0.00912	0.66
3	141840997	141841692	696	4.45	3.68	4.95	-1.27	0.00912	0.66
7	120055181	120055712	532	5.05	4.43	5.48	-1.06	0.00913	0.66
2	207311347	207311913	567	4.6	3.9	5.07	-1.17	0.00915	0.66
8	125514629	125515220	592	5.87	5.29	6.28	-0.98	0.00915	0.66
6	139714000	139714574	575	4.08	3.35	4.56	-1.21	0.00916	0.66
16	2430390	2430665	276	5.15	4.5	5.6	-1.1	0.00916	0.66
4	61520679	61521182	504	4.1	3.36	4.58	-1.21	0.00916	0.66
15	59313811	59314347	537	4.62	3.9	5.1	-1.2	0.00918	0.66
8	114539448	114540039	592	4.38	3.51	4.91	-1.4	0.00919	0.66
9	21576187	21576919	733	4.83	4.14	5.29	-1.15	0.0092	0.66
3	21116881	21117933	1053	5.83	5.27	6.24	-0.97	0.0092	0.66
14	76109187	76109453	267	4.61	3.98	5.05	-1.07	0.0092	0.66
17	82889500	82890248	749	6.55	5.96	6.97	-1.01	0.0092	0.66
6	145756020	145756613	594	4.49	3.8	4.96	-1.16	0.00922	0.661
5	147310162	147310733	572	5.52	4.9	5.96	-1.06	0.00923	0.661
2	120564223	120564671	449	5.3	4.72	5.71	-0.98	0.00923	0.661
6	124535757	124536139	383	4.02	3.03	4.6	-1.57	0.00927	0.663
12	107845854	107846617	764	5.35	4.81	5.75	-0.94	0.00929	0.663
13	30577334	30577818	485	4.15	3.32	4.67	-1.35	0.0093	0.663
2	94266717	94267034	318	4.87	4.19	5.33	-1.13	0.00931	0.663
13	20370538	20371433	896	5.1	4.41	5.56	-1.15	0.00931	0.663
18	12470525	12471112	588	4.51	3.79	4.99	-1.2	0.00932	0.663
3	170999666	171000247	582	5.1	4.4	5.57	-1.17	0.00932	0.663
9	110089681	110090403	723	4.68	4.06	5.11	-1.05	0.00934	0.664
9	14171029	14171493	465	4.18	3.4	4.68	-1.27	0.00936	0.665
18	46387559	46388154	596	4.56	3.86	5.03	-1.17	0.00937	0.665
6	63732414	63733190	777	5.01	4.37	5.45	-1.08	0.00939	0.665
11	72549285	72549857	573	5.77	5.13	6.21	-1.08	0.0094	0.665
19	15934323	15935587	1265	6.56	5.96	6.98	-1.02	0.0094	0.665
3	71532685	71533401	717	4.19	3.44	4.68	-1.24	0.00946	0.666
20	14219790	14220638	849	5.84	5.22	6.28	-1.06	0.00948	0.666
16	85520829	85521154	326	6.23	5.59	6.67	-1.07	0.00948	0.666
20	3804354	3804676	323	4.67	4.03	5.11	-1.08	0.00949	0.666
11	130580203	130580867	665	5.95	5.35	6.38	-1.03	0.00949	0.666
11	129930332	129930638	307	4.19	3.46	4.67	-1.21	0.00949	0.666
X	154074134	154074694	561	4.35	3.67	4.8	-1.14	0.00951	0.667
7	99631579	99632110	532	5.1	4.48	5.54	-1.06	0.00952	0.668
20	19784579	19785219	641	5.42	4.74	5.88	-1.14	0.00954	0.668
8	22715691	22716276	586	5.46	4.87	5.88	-1.01	0.00954	0.668
3	157785000	157785419	420	4.88	4.18	5.35	-1.18	0.00957	0.669
13	19243964	19244761	798	5.49	4.93	5.9	-0.97	0.00959	0.669
7	104922868	104923396	529	4.29	3.56	4.78	-1.22	0.00959	0.669
3	46948087	46948663	577	5.12	4.52	5.54	-1.02	0.00961	0.67
8	10756594	10757352	759	6.25	5.62	6.68	-1.07	0.00963	0.671
10	121553655	121554350	696	5.32	4.59	5.81	-1.22	0.00964	0.671
9	18060142	18060780	639	5.1	4.51	5.52	-1	0.00965	0.671
15	74179300	74180413	1114	6.71	6.1	7.13	-1.03	0.00967	0.672
13	27634182	27634888	707	6.01	5.35	6.46	-1.11	0.0097	0.672
1	203601880	203602272	393	4.52	3.7	5.04	-1.33	0.00971	0.672
12	120978351	120978692	342	4.24	3.57	4.7	-1.13	0.00972	0.672
14	44449521	44450000	480	4.74	4.17	5.14	-0.97	0.00973	0.672
12	46071430	46072641	1212	4.9	4.26	5.34	-1.08	0.00973	0.672
2	209431584	209432148	565	4.97	4.31	5.43	-1.12	0.00974	0.672
12	63319371	63319810	440	5.52	4.84	5.98	-1.14	0.00975	0.672
11	79244246	79244963	718	4.29	3.63	4.74	-1.11	0.00975	0.672
9	63729021	63729844	824	4.04	3.25	4.55	-1.3	0.00976	0.672
12	80079966	80080783	818	5.45	4.89	5.85	-0.96	0.00976	0.672
19	10554960	10555501	542	5.79	5.16	6.22	-1.07	0.00977	0.672
12	23949581	23950078	498	4.38	3.74	4.82	-1.08	0.00979	0.672
7	102451634	102452045	412	5.17	4.57	5.59	-1.02	0.00979	0.672
7	5646538	5647180	643	5.39	4.75	5.83	-1.08	0.00983	0.672
8	125546940	125547426	487	6.25	5.59	6.7	-1.11	0.00983	0.672
6	20542836	20543432	597	5.11	4.36	5.6	-1.25	0.00985	0.672
12	89951264	89952208	945	5.3	4.67	5.73	-1.06	0.00985	0.672
9	13942593	13943130	538	5.57	5.01	5.97	-0.97	0.00986	0.672
8	55921425	55921843	419	4.28	3.63	4.73	-1.1	0.00986	0.672
16	19008203	19008617	415	5.47	4.93	5.86	-0.93	0.00986	0.672
11	47924046	47924767	722	6.36	5.67	6.82	-1.15	0.00986	0.672
1	63981050	63981786	737	4.97	4.38	5.38	-1	0.00988	0.672
3	143135149	143135592	444	5.14	4.44	5.6	-1.17	0.00989	0.672
2	98483243	98483730	488	4.7	4.03	5.16	-1.13	0.00989	0.672
13	21670059	21670572	514	5.05	4.46	5.47	-1.02	0.0099	0.672
4	87521722	87522457	736	5.56	4.91	6	-1.09	0.00992	0.672
6	2839238	2839947	710	5.78	5.15	6.22	-1.07	0.00992	0.672
2	176106364	176107468	1105	7.14	6.43	7.61	-1.18	0.00993	0.672
7	73612724	73613201	478	5.83	5.14	6.3	-1.16	0.00994	0.672
6	2588842	2589765	924	6.21	5.58	6.65	-1.07	0.00995	0.672
15	20216718	20217310	593	5.07	4.38	5.53	-1.15	0.00997	0.672
16	82111889	82112488	600	5.68	5.09	6.1	-1	0.00997	0.672
3	4711388	4711910	523	4.61	3.92	5.07	-1.15	0.00997	0.672
12	27591663	27592068	406	5.4	4.68	5.88	-1.21	0.00998	0.672
12	63400051	63401290	1240	6.13	5.56	6.54	-0.98	0.00999	0.672
10	520454	520752	299	4.1	3.28	4.62	-1.34	0.01	0.672
1	204104163	204105082	920	6.68	6.02	7.14	-1.11	0.01	0.672
12	11633880	11634403	524	4.55	3.8	5.04	-1.23	0.01	0.672
11	7596966	7597365	400	4.52	3.83	4.99	-1.16	0.0101	0.672
4	186887138	186887623	486	4.26	3.5	4.75	-1.25	0.0101	0.672
X	95974852	95975364	513	4.1	3.23	4.64	-1.4	0.0101	0.672
3	142925076	142925754	679	4.93	4.31	5.37	-1.06	0.0101	0.672
21	38660589	38661517	929	4.53	3.81	5.01	-1.21	0.0101	0.672
15	47384318	47384746	429	4.15	3.23	4.71	-1.48	0.0101	0.672
5	54881365	54882080	716	4.31	3.55	4.8	-1.26	0.0101	0.672
16	21159333	21159980	648	5.67	5.14	6.06	-0.91	0.0101	0.672
7	2249026	2249375	350	4.98	4.29	5.44	-1.16	0.0101	0.672
15	71279128	71279825	698	4.76	4.12	5.21	-1.09	0.0101	0.672
15	43602005	43602693	689	5.42	4.67	5.91	-1.24	0.0101	0.672
3	122894055	122894372	318	4.26	3.54	4.73	-1.18	0.0101	0.672
X	121781920	121782567	648	5.05	4.4	5.49	-1.09	0.0101	0.672
16	48397379	48397799	421	5.18	4.44	5.67	-1.23	0.0101	0.672
1	206714559	206715008	450	4.17	3.38	4.68	-1.3	0.0101	0.673
3	172559834	172560372	539	5.73	5.04	6.19	-1.15	0.0101	0.673
6	160386613	160387443	831	6.98	6.29	7.45	-1.17	0.0102	0.673
10	5525721	5526296	576	5.04	4.45	5.45	-1	0.0102	0.673
7	83486514	83487334	821	4.81	4.18	5.24	-1.06	0.0102	0.673
15	29018416	29018855	440	3.99	3.25	4.48	-1.23	0.0102	0.673
9	84970370	84970812	443	4.49	3.7	5	-1.3	0.0102	0.674
13	30108805	30109330	526	5.41	4.78	5.84	-1.05	0.0102	0.674
8	102909836	102910105	270	4.28	3.51	4.78	-1.27	0.0102	0.674
4	1783036	1783402	367	5.57	5	5.98	-0.98	0.0102	0.674
2	101120633	101120976	344	4.68	4.03	5.13	-1.1	0.0102	0.674
3	40137630	40138031	402	4.25	3.45	4.76	-1.31	0.0102	0.674
16	66189328	66190348	1021	5.25	4.66	5.67	-1.01	0.0103	0.674
22	20010055	20011060	1006	6.04	5.49	6.43	-0.94	0.0103	0.674
11	102138770	102139565	796	5.37	4.67	5.83	-1.16	0.0103	0.675
18	62716939	62717558	620	4.63	3.91	5.11	-1.19	0.0103	0.675
9	94782952	94783663	712	5.57	4.8	6.07	-1.28	0.0103	0.675
5	109739636	109740732	1097	4.48	3.75	4.96	-1.2	0.0104	0.677
10	99920875	99921288	414	4.15	3.48	4.61	-1.13	0.0104	0.677
2	9102963	9103749	787	6.08	5.5	6.5	-1	0.0104	0.677
16	20865738	20866680	943	5.53	4.92	5.95	-1.02	0.0104	0.677
16	4053792	4054264	473	4.39	3.62	4.89	-1.27	0.0104	0.677
8	54268947	54269389	443	4.37	3.72	4.81	-1.08	0.0104	0.677
8	131711637	131712141	505	4.48	3.84	4.92	-1.08	0.0104	0.677
1	211037054	211037559	506	5.07	4.32	5.57	-1.24	0.0104	0.678
11	123543813	123544285	473	4.05	3.23	4.56	-1.33	0.0105	0.679
1	48878316	48878952	637	5.74	5.14	6.17	-1.03	0.0105	0.679
3	124845322	124845880	559	4.49	3.88	4.92	-1.04	0.0105	0.679
6	31125149	31125609	461	5.49	4.91	5.9	-0.99	0.0105	0.679
1	43536359	43536916	558	5.77	5.24	6.16	-0.92	0.0105	0.68
14	48561426	48561825	400	4.87	4.17	5.34	-1.17	0.0105	0.681
7	49294725	49295512	788	4.63	4.04	5.04	-1	0.0106	0.682
17	82104015	82104323	309	6.32	5.71	6.75	-1.04	0.0106	0.684
6	47852613	47853103	491	4.41	3.73	4.87	-1.14	0.0107	0.686
5	45578226	45578706	481	4.74	4.12	5.18	-1.06	0.0107	0.686
17	50922123	50922467	345	5.34	4.57	5.84	-1.27	0.0107	0.686
12	46209899	46210466	568	4.95	4.23	5.42	-1.19	0.0107	0.686
12	93122242	93123073	832	4.54	3.84	5	-1.17	0.0107	0.686
14	24982479	24983156	678	5.08	4.44	5.52	-1.08	0.0107	0.687
2	27010738	27011186	449	4.87	4.05	5.39	-1.33	0.0107	0.687
5	79504138	79504583	446	4	3.09	4.56	-1.46	0.0107	0.687
5	155529341	155529838	498	4.74	4.02	5.21	-1.19	0.0107	0.687
11	119845779	119846290	512	5.05	4.49	5.45	-0.96	0.0108	0.687
16	59905619	59906221	603	4.8	4.1	5.27	-1.17	0.0108	0.687
1	96560028	96560566	539	4.91	4.31	5.33	-1.02	0.0108	0.687
22	50530069	50530498	430	5.11	4.45	5.56	-1.11	0.0108	0.687
9	111731148	111731573	426	4.26	3.55	4.73	-1.18	0.0108	0.687
1	211331389	211331702	314	4.28	3.51	4.78	-1.27	0.0108	0.687
6	113560902	113561338	437	4.22	3.33	4.76	-1.43	0.0108	0.687
3	33942353	33942870	518	4.18	3.39	4.69	-1.3	0.0108	0.687
1	172718982	172719686	705	4.75	4.06	5.22	-1.16	0.0108	0.687
12	57844642	57845209	568	5.46	4.89	5.87	-0.98	0.0108	0.687
8	128167687	128168293	607	5.47	4.88	5.89	-1.01	0.0109	0.687
5	135156464	135157653	1190	6.13	5.52	6.56	-1.05	0.0109	0.687
20	39605879	39606342	464	4.9	4.09	5.41	-1.32	0.0109	0.687
7	79622735	79623292	558	4.08	3.29	4.59	-1.3	0.0109	0.687
13	97125526	97126507	982	5.38	4.81	5.78	-0.97	0.0109	0.687
14	71798915	71799458	544	5.37	4.7	5.83	-1.13	0.0109	0.687
3	171752845	171753500	656	5.93	5.25	6.4	-1.15	0.0109	0.687
19	43342017	43342504	488	4.48	3.64	5.01	-1.36	0.0109	0.687
5	172185630	172186055	426	6.04	5.39	6.49	-1.1	0.0109	0.687
8	61366209	61367197	989	5.07	4.51	5.48	-0.97	0.011	0.687
16	54822521	54822898	378	4	3.22	4.5	-1.29	0.011	0.687
8	101071782	101072108	327	4.45	3.79	4.89	-1.11	0.011	0.687
22	42965101	42965475	375	4.95	4.38	5.36	-0.98	0.011	0.687
4	171903127	171903976	850	4.18	3.51	4.64	-1.14	0.011	0.687
7	54687486	54687939	454	4.29	3.56	4.77	-1.21	0.011	0.687
16	14003146	14003631	486	5.17	4.58	5.59	-1.01	0.011	0.687
11	69288107	69288780	674	7.16	6.57	7.57	-1	0.011	0.687
22	21025743	21026210	468	5.02	4.42	5.44	-1.02	0.011	0.687
1	205355021	205355449	429	4.37	3.71	4.82	-1.11	0.011	0.687
12	26185329	26186279	951	4.81	4.14	5.27	-1.13	0.011	0.687
8	55647988	55649196	1209	5.02	4.49	5.41	-0.92	0.011	0.687
2	19140530	19141206	677	4.77	4.07	5.25	-1.18	0.011	0.687
14	100076173	100076590	418	4.78	4.14	5.23	-1.1	0.011	0.687
3	102378135	102378843	709	6.21	5.45	6.71	-1.26	0.011	0.687
3	135878513	135878862	350	4.26	3.48	4.77	-1.29	0.0111	0.687
X	22136277	22136714	438	5	4.42	5.42	-0.99	0.0111	0.687
8	6909671	6910183	513	4.47	3.8	4.92	-1.13	0.0111	0.687
11	85170154	85170619	466	4.3	3.64	4.75	-1.11	0.0111	0.687
10	44853176	44853676	501	4.55	3.84	5.02	-1.18	0.0111	0.687
22	24958480	24958965	486	4.52	3.78	5	-1.22	0.0111	0.687
6	36751915	36753016	1102	6.72	6.12	7.15	-1.02	0.0111	0.687
10	114519066	114519611	546	4.95	4.32	5.39	-1.07	0.0111	0.687
18	10197035	10197487	453	4.67	4.01	5.12	-1.11	0.0112	0.687
6	131488749	131489418	670	4.43	3.77	4.88	-1.12	0.0112	0.687
11	14411787	14412211	425	4.3	3.64	4.75	-1.1	0.0112	0.687
7	130995545	130996057	513	4.67	4.03	5.12	-1.08	0.0112	0.687
1	204301195	204301779	585	5.1	4.52	5.51	-0.99	0.0112	0.687
3	123807606	123808373	768	6.7	6.04	7.14	-1.1	0.0112	0.689
3	169634681	169635176	496	4.13	3.29	4.65	-1.36	0.0112	0.689
3	149300102	149300834	733	6.16	5.39	6.66	-1.27	0.0112	0.689
10	74021201	74021695	495	4.25	3.46	4.77	-1.31	0.0112	0.689
21	45572820	45573393	574	5.09	4.5	5.51	-1.01	0.0113	0.689
16	12612602	12613010	409	5.12	4.46	5.57	-1.11	0.0113	0.689
4	8238065	8238676	612	5.45	4.92	5.83	-0.91	0.0113	0.689
15	99955850	99956608	759	6.2	5.55	6.64	-1.1	0.0113	0.689
8	29511492	29511944	453	4.28	3.43	4.81	-1.39	0.0113	0.69
14	77023076	77023780	705	6.73	6.11	7.16	-1.05	0.0113	0.69
3	172672845	172673663	819	5.89	5.31	6.3	-0.99	0.0113	0.69
1	47905892	47906366	475	4.76	4.21	5.16	-0.95	0.0113	0.69
15	92869007	92869602	596	4.58	3.96	5.01	-1.05	0.0113	0.69
12	122468035	122468416	382	5.37	4.73	5.81	-1.08	0.0113	0.69
5	31990669	31991196	528	4.49	3.77	4.97	-1.2	0.0113	0.69
1	67552296	67552778	483	5.3	4.67	5.73	-1.06	0.0114	0.69
3	183382348	183382665	318	5.16	4.59	5.56	-0.96	0.0114	0.69
2	9594537	9595071	535	4.28	3.56	4.75	-1.2	0.0114	0.69
5	139643110	139643897	788	6.43	5.85	6.85	-1	0.0114	0.69
1	94634921	94635391	471	4.5	3.84	4.94	-1.1	0.0114	0.69
1	85527031	85527605	575	4.53	3.72	5.05	-1.33	0.0114	0.69
16	10878451	10879046	596	5.76	5.13	6.2	-1.07	0.0114	0.69
8	129627084	129627420	337	4.82	4.13	5.28	-1.15	0.0114	0.69
16	57325365	57325881	517	4.28	3.63	4.73	-1.1	0.0114	0.69
1	113388651	113389026	376	5.89	5.18	6.36	-1.18	0.0115	0.69
15	56041951	56042379	429	4.15	3.45	4.62	-1.17	0.0115	0.69
2	229344070	229344498	429	4.01	3.22	4.52	-1.3	0.0115	0.69
5	151257686	151258289	604	5.89	5.24	6.33	-1.1	0.0115	0.69
11	73271958	73272587	630	5.27	4.68	5.69	-1	0.0115	0.69
20	58818632	58819058	427	4.62	4.03	5.04	-1.01	0.0115	0.69
8	80753075	80753647	573	5.89	5.16	6.37	-1.21	0.0115	0.69
3	177816672	177817331	660	5.2	4.59	5.63	-1.04	0.0115	0.69
22	46750936	46751231	296	6.34	5.83	6.71	-0.89	0.0115	0.69
22	32846957	32847484	528	4.62	3.91	5.09	-1.18	0.0115	0.69
11	88179170	88179559	390	4.69	3.98	5.17	-1.18	0.0115	0.69
9	36903433	36904261	829	6.13	5.42	6.6	-1.18	0.0115	0.69
10	131947780	131948292	513	4.96	4.4	5.35	-0.95	0.0115	0.69
12	19030984	19031439	456	5.6	4.92	6.05	-1.14	0.0115	0.69
10	99666914	99667475	562	4.46	3.83	4.89	-1.06	0.0116	0.692
2	110741570	110742078	509	4.53	3.9	4.97	-1.07	0.0116	0.692
1	184953514	184954007	494	5.37	4.67	5.85	-1.18	0.0116	0.692
15	70324175	70324655	481	5.57	4.94	6	-1.07	0.0116	0.693
2	60499631	60500408	778	5.44	4.94	5.82	-0.88	0.0117	0.695
1	173405807	173406271	465	4	3.14	4.53	-1.4	0.0117	0.695
11	112537854	112538661	808	5.65	5.08	6.05	-0.98	0.0117	0.695
14	34052528	34053048	521	5.45	4.81	5.89	-1.08	0.0117	0.695
16	57998370	57998852	483	5.88	5.39	6.25	-0.86	0.0117	0.695
2	64784511	64785125	615	5.16	4.62	5.55	-0.94	0.0118	0.695
9	115690883	115691528	646	4.34	3.6	4.83	-1.24	0.0118	0.695
12	3046851	3047251	401	4.86	4.32	5.25	-0.94	0.0118	0.695
Y	11054534	11054805	272	4.36	3.62	4.85	-1.23	0.0118	0.695
1	69109993	69110433	441	4.19	3.4	4.69	-1.29	0.0118	0.695
11	107385498	107385959	462	5.33	4.68	5.79	-1.11	0.0118	0.695
15	91973507	91973825	319	4.26	3.5	4.76	-1.27	0.0118	0.695
9	121972386	121973070	685	6.43	5.68	6.92	-1.24	0.0118	0.695
16	79677856	79678715	860	5.73	4.98	6.22	-1.25	0.0118	0.695
19	43149714	43150279	566	4.41	3.64	4.91	-1.26	0.0118	0.695
8	109737562	109738032	471	5.11	4.36	5.6	-1.23	0.0119	0.695
16	49855459	49855876	418	5.32	4.72	5.73	-1.01	0.0119	0.695
11	122856605	122857166	562	5.57	4.91	6.02	-1.11	0.0119	0.695
1	41954493	41954964	472	4.79	4.16	5.23	-1.07	0.0119	0.695
2	45675262	45675806	545	4.28	3.58	4.74	-1.16	0.0119	0.695
14	63155533	63156101	569	4.54	3.91	4.97	-1.07	0.0119	0.695
10	51879187	51879718	532	4.91	4.3	5.34	-1.04	0.0119	0.695
12	92551867	92552356	490	5.52	4.91	5.95	-1.03	0.0119	0.695
4	38728556	38729177	622	4.43	3.6	4.96	-1.36	0.0119	0.696
16	12061294	12061603	310	4.43	3.81	4.87	-1.06	0.0119	0.696
14	19646158	19646766	609	5.15	4.49	5.6	-1.1	0.012	0.699
8	104077542	104078045	504	4.66	4.08	5.07	-0.99	0.012	0.699
12	9526869	9527629	761	4.59	3.94	5.04	-1.1	0.012	0.699
12	95098004	95098663	660	5.35	4.78	5.76	-0.99	0.0121	0.699
8	117044746	117045037	292	4.02	3.23	4.53	-1.3	0.0121	0.699
8	100425805	100426342	538	4.96	4.29	5.41	-1.12	0.0121	0.699
6	9481930	9482600	671	4.78	4.07	5.25	-1.18	0.0121	0.699
12	9687221	9687625	405	4.83	4.2	5.27	-1.06	0.0121	0.699
14	89899814	89900229	416	4.03	3.16	4.56	-1.4	0.0121	0.699
X	13517738	13518513	776	4.46	3.6	4.99	-1.39	0.0121	0.699
12	64080517	64081069	553	4.59	3.91	5.05	-1.14	0.0121	0.7
20	49701400	49701940	541	5.19	4.55	5.63	-1.08	0.0121	0.7
13	40190617	40191117	501	4.26	3.58	4.72	-1.14	0.0121	0.7
2	28716349	28716880	532	5.46	4.83	5.89	-1.06	0.0122	0.702
17	81676660	81677157	498	5.53	5.04	5.9	-0.87	0.0122	0.702
16	66714013	66714769	757	5.58	4.86	6.06	-1.2	0.0122	0.702
8	108638638	108639324	687	4.7	3.99	5.17	-1.17	0.0123	0.702
19	45200730	45201114	385	4.11	3.44	4.57	-1.13	0.0123	0.703
14	64620868	64621274	407	5.3	4.73	5.71	-0.98	0.0123	0.703
7	5509750	5510134	385	4.83	4.21	5.26	-1.06	0.0123	0.703
4	6695650	6696258	609	5.11	4.4	5.59	-1.18	0.0123	0.703
3	184541109	184541463	355	4.58	3.94	5.02	-1.08	0.0123	0.704
9	91500426	91501000	575	4.78	4.08	5.25	-1.17	0.0124	0.704
5	38673649	38674203	555	4.82	4.23	5.23	-1	0.0124	0.704
10	113045501	113046180	680	4.97	4.26	5.44	-1.17	0.0124	0.704
9	764030	764466	437	4.05	3.35	4.52	-1.17	0.0124	0.704
8	97835105	97835790	686	5.36	4.7	5.81	-1.11	0.0124	0.705
18	5900187	5900657	471	4.49	3.8	4.96	-1.17	0.0124	0.705
4	101649918	101650439	522	4.64	3.86	5.15	-1.28	0.0124	0.705
1	206586716	206587053	338	4.34	3.69	4.78	-1.09	0.0124	0.705
5	181024261	181025080	820	5.41	4.84	5.82	-0.98	0.0125	0.705
2	190413462	190414053	592	4.17	3.46	4.65	-1.19	0.0125	0.705
11	111426545	111426974	430	4.66	3.95	5.13	-1.18	0.0125	0.706
6	97150966	97151508	543	4.39	3.76	4.83	-1.06	0.0125	0.707
10	118300329	118300909	581	4.74	4.14	5.16	-1.02	0.0125	0.707
X	45433901	45434660	760	5.11	4.43	5.57	-1.15	0.0126	0.707
5	104062585	104063169	585	4.29	3.62	4.75	-1.13	0.0126	0.707
9	136558116	136558548	433	5.82	5.26	6.23	-0.97	0.0126	0.707
16	68802169	68802633	465	5.18	4.6	5.6	-1	0.0126	0.707
7	151838835	151839167	333	4.55	3.93	4.98	-1.05	0.0126	0.708
1	54323257	54323869	613	6.65	6.04	7.08	-1.04	0.0126	0.708
5	38739090	38739718	629	4.27	3.41	4.81	-1.4	0.0126	0.708
1	68916278	68916821	544	4.23	3.53	4.71	-1.18	0.0126	0.708
X	65643012	65643902	891	4.43	3.7	4.91	-1.2	0.0127	0.708
6	105608867	105609999	1133	5.36	4.78	5.78	-1	0.0127	0.708
5	172482435	172483011	577	4.7	4.1	5.12	-1.02	0.0127	0.708
10	72028093	72028686	594	5.44	4.76	5.9	-1.14	0.0127	0.708
17	61833516	61833938	423	4.77	4.09	5.23	-1.15	0.0127	0.708
10	62083914	62084278	365	4.06	3.33	4.55	-1.22	0.0127	0.708
9	132094513	132094952	440	5.25	4.67	5.66	-0.99	0.0127	0.708
11	79092887	79093493	607	5.31	4.7	5.74	-1.04	0.0127	0.708
17	82133515	82133913	399	5.56	4.89	6.02	-1.13	0.0127	0.708
14	22837952	22838312	361	4.94	4.37	5.35	-0.98	0.0128	0.708
1	154474668	154475239	572	4.85	4.3	5.25	-0.94	0.0128	0.708
13	49281071	49281652	582	4.51	3.9	4.94	-1.04	0.0128	0.708
6	16752279	16752819	541	4.9	4.28	5.33	-1.05	0.0128	0.708
13	100022756	100023425	670	5.06	4.35	5.53	-1.18	0.0128	0.708
19	24192696	24193245	550	4.46	3.76	4.93	-1.17	0.0128	0.708
7	112420228	112420865	638	5.29	4.7	5.71	-1.01	0.0128	0.708
4	81030537	81031838	1302	4.98	4.37	5.41	-1.04	0.0128	0.708
6	37023460	37023848	389	5.78	5.1	6.24	-1.14	0.0128	0.708
4	7842617	7843239	623	5.07	4.4	5.52	-1.13	0.0128	0.708
6	40295622	40295988	367	4.15	3.4	4.63	-1.23	0.0128	0.708
4	142473771	142475071	1301	7.14	6.51	7.58	-1.07	0.0128	0.708
7	41247463	41248005	543	4.57	3.82	5.07	-1.24	0.0129	0.708
4	21108879	21109752	874	4.98	4.35	5.42	-1.06	0.0129	0.708
4	95304946	95305359	414	4.04	3.22	4.56	-1.34	0.0129	0.709
5	13510523	13511060	538	6.22	5.6	6.65	-1.05	0.0129	0.709
13	44188067	44188795	729	5.86	5.21	6.31	-1.1	0.0129	0.709
1	11862767	11863292	526	4.49	3.78	4.96	-1.18	0.0129	0.709
6	169571049	169571682	634	4.49	3.75	4.98	-1.23	0.0129	0.709
8	123922006	123922573	568	5.27	4.74	5.66	-0.93	0.0129	0.709
19	45123345	45123675	331	4.23	3.54	4.7	-1.17	0.0129	0.709
8	48522240	48523004	765	6.01	5.29	6.48	-1.19	0.013	0.71
7	84701877	84702343	467	4.74	4.1	5.18	-1.08	0.013	0.71
17	41726503	41727014	512	5.27	4.63	5.71	-1.08	0.013	0.71
10	5538627	5539395	769	4.8	4.2	5.22	-1.02	0.013	0.71
6	158452000	158452592	593	5.46	4.94	5.84	-0.9	0.013	0.71
2	186771580	186772688	1109	5.25	4.67	5.66	-0.99	0.013	0.71
5	17375427	17376028	602	5.65	5.12	6.04	-0.92	0.013	0.71
5	14304989	14305458	470	6.1	5.51	6.52	-1.02	0.013	0.71
15	40106557	40107120	564	6.59	5.96	7.03	-1.07	0.0131	0.71
18	44887171	44887713	543	4.45	3.84	4.88	-1.04	0.0131	0.71
6	12560130	12560937	808	4.4	3.78	4.83	-1.05	0.0131	0.711
X	16953628	16954187	560	4.92	4.21	5.39	-1.18	0.0131	0.712
8	126878520	126879121	602	5.94	5.37	6.35	-0.97	0.0131	0.712
9	132069074	132069581	508	5.04	4.36	5.5	-1.14	0.0132	0.714
18	79876218	79876870	653	4.87	4.12	5.36	-1.24	0.0132	0.714
17	74282676	74283428	753	6.17	5.5	6.62	-1.12	0.0132	0.714
8	119982451	119983538	1088	6.3	5.69	6.72	-1.04	0.0133	0.715
3	12155772	12156235	464	5.57	4.89	6.02	-1.13	0.0133	0.715
18	79062767	79063248	482	5.63	4.94	6.1	-1.16	0.0133	0.715
15	80850907	80851630	724	5.5	4.85	5.95	-1.09	0.0133	0.715
16	29419537	29420226	690	5.57	4.91	6.02	-1.1	0.0133	0.715
1	149837834	149838429	596	4.11	3.38	4.6	-1.21	0.0133	0.715
2	46224780	46225300	521	4	3.14	4.54	-1.4	0.0133	0.715
5	154519346	154519759	414	4.76	4.14	5.2	-1.06	0.0133	0.715
10	125037187	125037625	439	5.11	4.5	5.54	-1.04	0.0133	0.715
12	113193830	113194373	544	5.62	5.02	6.04	-1.03	0.0134	0.716
16	48458133	48458664	532	5.85	5.22	6.29	-1.07	0.0134	0.716
16	21873262	21873822	561	4.06	3.23	4.58	-1.35	0.0134	0.716
13	39148443	39148994	552	4.93	4.22	5.4	-1.18	0.0134	0.717
1	84842760	84843239	480	4.43	3.83	4.86	-1.03	0.0134	0.717
12	85835911	85836669	759	4.05	3.37	4.51	-1.14	0.0134	0.717
12	88934258	88934820	563	5.12	4.4	5.59	-1.19	0.0135	0.717
17	58377018	58377695	678	5.04	4.48	5.44	-0.96	0.0135	0.717
10	127044193	127044563	371	4.22	3.5	4.7	-1.2	0.0135	0.717
2	96886123	96886625	503	4.98	4.41	5.39	-0.98	0.0135	0.717
8	117231808	117232638	831	4.71	4.06	5.15	-1.09	0.0135	0.717
11	101215016	101215476	461	4.04	3.25	4.54	-1.29	0.0135	0.717
6	137657196	137658045	850	5.36	4.67	5.82	-1.15	0.0135	0.717
7	151696730	151697290	561	6.23	5.64	6.65	-1.01	0.0135	0.717
17	43556228	43556712	485	5.32	4.68	5.76	-1.08	0.0135	0.717
21	34846534	34846921	388	4.15	3.31	4.67	-1.36	0.0135	0.717
5	43510341	43511462	1122	6.32	5.74	6.73	-0.99	0.0135	0.717
1	159015422	159015848	427	4.85	4.18	5.3	-1.13	0.0135	0.717
17	74301159	74301517	359	4.6	3.96	5.04	-1.08	0.0135	0.717
12	95454840	95455242	403	4.12	3.31	4.64	-1.32	0.0135	0.717
14	100059460	100059809	350	4.37	3.72	4.82	-1.11	0.0136	0.717
5	59768126	59768969	844	5.18	4.55	5.62	-1.07	0.0136	0.717
2	130864665	130865273	609	4.66	4.03	5.1	-1.07	0.0136	0.717
15	33068160	33069199	1040	6.55	5.87	7.01	-1.14	0.0136	0.717
12	85076719	85077097	379	4.81	4.2	5.24	-1.04	0.0136	0.717
12	123807971	123808434	464	4.01	3.25	4.5	-1.25	0.0136	0.717
7	51019226	51019799	574	5.05	4.47	5.45	-0.98	0.0136	0.717
2	118242129	118242709	581	4.9	4.38	5.28	-0.9	0.0136	0.717
17	81308999	81309874	876	7.73	7.09	8.17	-1.08	0.0137	0.717
2	11631497	11631912	416	4.86	4.19	5.32	-1.13	0.0137	0.717
1	181768191	181768741	551	5.47	4.89	5.88	-0.99	0.0137	0.717
10	132421241	132421814	574	6	5.48	6.39	-0.91	0.0137	0.717
5	37888528	37888816	289	4.36	3.76	4.78	-1.02	0.0137	0.717
1	40886643	40887212	570	5.51	4.93	5.92	-0.98	0.0137	0.717
14	32230215	32230876	662	4.31	3.69	4.74	-1.05	0.0137	0.717
3	172129813	172130785	973	6.31	5.63	6.77	-1.13	0.0137	0.717
1	201302531	201302877	347	4.65	4.08	5.05	-0.97	0.0137	0.717
2	136764439	136766297	1859	5.79	5.31	6.15	-0.84	0.0137	0.717
7	732060	732587	528	5.23	4.56	5.68	-1.12	0.0137	0.717
X	40912559	40913115	557	5.15	4.52	5.59	-1.06	0.0137	0.717
9	12784248	12785801	1554	7.23	6.62	7.65	-1.04	0.0137	0.717
17	72683690	72684529	840	6.66	6.05	7.09	-1.04	0.0137	0.717
2	213640666	213641479	814	4.5	3.85	4.95	-1.1	0.0138	0.718
14	18674218	18674642	425	4.29	3.54	4.78	-1.25	0.0138	0.718
5	32231879	32233047	1169	5.65	5.16	6.02	-0.86	0.0138	0.718
5	36373487	36374087	601	4.61	4.06	5.01	-0.96	0.0138	0.718
1	235404127	235404647	521	5.33	4.67	5.78	-1.11	0.0138	0.718
15	85800494	85800857	364	5.56	4.93	5.99	-1.07	0.0138	0.718
1	173062062	173062861	800	6.31	5.7	6.73	-1.03	0.0138	0.718
14	68598663	68599231	569	5.25	4.71	5.64	-0.93	0.0138	0.718
15	35713731	35714162	432	4.28	3.63	4.72	-1.09	0.0139	0.719
11	35363792	35364418	627	4.65	3.95	5.12	-1.17	0.0139	0.719
2	236875802	236876403	602	4.92	4.38	5.31	-0.92	0.0139	0.719
2	118003127	118003832	706	4.09	3.43	4.54	-1.11	0.0139	0.719
1	46516943	46517582	640	8.03	7.31	8.51	-1.21	0.0139	0.719
15	100929505	100930217	713	6.77	6.18	7.19	-1.01	0.0139	0.719
14	98498122	98498699	578	5.91	5.31	6.33	-1.02	0.0139	0.719
18	45774086	45774831	746	5.12	4.53	5.54	-1	0.0139	0.719
1	183881701	183882118	418	4.47	3.82	4.92	-1.11	0.014	0.719
8	101642317	101642699	383	5.67	5.08	6.08	-1	0.014	0.719
19	57651111	57651856	746	6.48	5.86	6.91	-1.05	0.014	0.719
1	67626454	67626880	427	4.57	3.86	5.04	-1.18	0.014	0.719
11	57071868	57072984	1117	5.72	5.17	6.11	-0.95	0.014	0.719
12	10395540	10396071	532	5.07	4.4	5.53	-1.13	0.014	0.719
11	72145034	72145642	609	5.74	5.13	6.17	-1.04	0.014	0.719
15	59567443	59567811	369	4.31	3.63	4.77	-1.14	0.014	0.719
15	55897075	55898020	946	5.56	5.01	5.95	-0.94	0.014	0.719
1	205258852	205259228	377	6.04	5.44	6.47	-1.03	0.014	0.719
9	27626034	27627137	1104	4.74	4.16	5.15	-0.99	0.014	0.719
16	81928932	81929525	594	5.14	4.54	5.56	-1.01	0.0141	0.719
2	68799618	68800417	800	4.97	4.37	5.4	-1.03	0.0141	0.719
11	129704690	129705606	917	6.16	5.6	6.56	-0.96	0.0141	0.719
11	49526219	49526657	439	4.01	3.28	4.5	-1.22	0.0141	0.719
3	37992720	37992994	275	4.95	4.39	5.36	-0.97	0.0141	0.719
3	151976150	151976598	449	4.93	4.27	5.38	-1.11	0.0141	0.719
9	36273380	36273795	416	4.09	3.37	4.57	-1.19	0.0141	0.719
1	90821365	90821813	449	4.2	3.54	4.65	-1.12	0.0141	0.719
6	155154178	155154603	426	4.77	4.06	5.24	-1.18	0.0141	0.719
8	118056188	118056906	719	6.15	5.57	6.56	-0.99	0.0141	0.719
13	31045432	31046183	752	5.5	4.97	5.89	-0.92	0.0142	0.719
12	13390330	13390903	574	6.2	5.49	6.68	-1.19	0.0142	0.719
22	46557731	46558244	514	7.2	6.62	7.61	-0.99	0.0142	0.719
17	6170372	6170793	422	3.99	3.24	4.47	-1.23	0.0142	0.719
3	173977735	173978255	521	4.13	3.5	4.57	-1.07	0.0142	0.719
3	159169717	159170135	419	4.1	3.41	4.57	-1.16	0.0142	0.719
7	159217897	159218876	980	6.09	5.45	6.53	-1.08	0.0143	0.719
6	87714346	87714896	551	4.65	4.05	5.07	-1.02	0.0143	0.719
8	127426563	127427486	924	7.29	6.59	7.76	-1.17	0.0143	0.719
8	124655119	124655852	734	6.55	5.9	7	-1.09	0.0143	0.719
15	84755806	84756284	479	4.37	3.76	4.79	-1.03	0.0143	0.719
3	153979703	153980800	1098	5.2	4.69	5.57	-0.88	0.0143	0.719
12	1660297	1660591	295	5.49	4.81	5.95	-1.14	0.0143	0.719
15	51864305	51865010	706	6.42	5.82	6.85	-1.03	0.0143	0.719
8	119200707	119201069	363	5.26	4.67	5.68	-1	0.0143	0.719
22	32605501	32606217	717	5.04	4.53	5.42	-0.89	0.0143	0.719
11	65555450	65556261	812	9.54	8.89	9.99	-1.11	0.0143	0.719
7	111198174	111198691	518	5.47	4.76	5.95	-1.18	0.0143	0.719
16	49921819	49922194	376	4.23	3.58	4.67	-1.09	0.0143	0.719
17	69213105	69213839	735	5.26	4.53	5.74	-1.21	0.0143	0.719
19	48269673	48270123	451	4.97	4.28	5.43	-1.15	0.0143	0.719
3	189792132	189792455	324	4.14	3.47	4.59	-1.12	0.0143	0.719
7	145082329	145083216	888	5.35	4.8	5.75	-0.95	0.0143	0.719
3	171447345	171447684	340	4.24	3.45	4.75	-1.3	0.0143	0.719
3	114319435	114319830	396	4.2	3.44	4.7	-1.26	0.0143	0.719
22	17328912	17329530	619	5.17	4.53	5.61	-1.08	0.0144	0.719
16	81996823	81998176	1354	5.84	5.33	6.22	-0.89	0.0144	0.719
1	160414935	160415223	289	4.12	3.48	4.56	-1.08	0.0144	0.719
6	71386079	71386629	551	4.81	4.02	5.32	-1.3	0.0144	0.719
3	30688906	30689571	666	4.35	3.55	4.86	-1.32	0.0144	0.719
3	11096385	11097197	813	6.62	6	7.05	-1.05	0.0144	0.719
1	119046323	119046863	541	5.15	4.4	5.64	-1.24	0.0144	0.719
6	155782188	155782888	701	6.1	5.38	6.57	-1.19	0.0145	0.72
8	80914746	80915857	1112	6.19	5.64	6.59	-0.95	0.0145	0.72
9	134602518	134602991	474	5.34	4.81	5.73	-0.92	0.0145	0.72
2	190578336	190579148	813	6.51	5.81	6.98	-1.17	0.0145	0.72
X	1709088	1709819	732	4.69	4.08	5.12	-1.04	0.0145	0.72
22	43789317	43789945	629	6.34	5.67	6.79	-1.13	0.0145	0.72
14	68774708	68775203	496	4.4	3.78	4.83	-1.04	0.0145	0.72
2	12317843	12319075	1233	5.08	4.45	5.52	-1.06	0.0145	0.72
2	216006179	216006687	509	4.95	4.41	5.35	-0.94	0.0145	0.72
14	55938211	55938816	606	5.3	4.71	5.71	-1.01	0.0145	0.72
14	20714960	20715477	518	4.46	3.84	4.89	-1.05	0.0145	0.72
18	23994436	23994922	487	5.09	4.5	5.51	-1.01	0.0145	0.72
1	33338510	33339076	567	4.32	3.65	4.77	-1.12	0.0146	0.72
6	142902561	142903084	524	4.32	3.61	4.79	-1.18	0.0146	0.72
1	21999664	22000101	438	4.97	4.38	5.39	-1.01	0.0146	0.72
15	74588477	74589265	789	5.88	5.28	6.3	-1.02	0.0146	0.72
3	195001961	195002345	385	4.87	4.26	5.3	-1.04	0.0146	0.72
1	2208217	2208863	647	6.6	6.01	7.02	-1.01	0.0146	0.72
12	80461865	80462564	700	5.34	4.74	5.76	-1.02	0.0146	0.721
12	112303023	112303458	436	4.21	3.49	4.69	-1.2	0.0147	0.721
8	102685578	102686310	733	6.1	5.55	6.5	-0.95	0.0147	0.721
1	45557384	45557808	425	5.17	4.54	5.6	-1.06	0.0147	0.721
18	23718123	23718728	606	4.58	4.03	4.97	-0.94	0.0147	0.721
2	9310417	9310877	461	4.9	4.25	5.34	-1.1	0.0147	0.721
16	68798276	68798881	606	5.88	5.24	6.33	-1.09	0.0147	0.721
8	98393149	98393806	658	4.53	3.92	4.96	-1.04	0.0147	0.721
3	94293840	94294582	743	5	4.4	5.42	-1.02	0.0147	0.722
4	82745109	82745785	677	4.95	4.37	5.36	-1	0.0148	0.723
13	30395173	30395790	618	4.67	4.06	5.1	-1.04	0.0148	0.724
11	33061196	33062017	822	5.37	4.78	5.78	-1	0.0148	0.725
5	43422168	43422493	326	4.14	3.39	4.64	-1.25	0.0148	0.725
8	41818690	41819410	721	5.6	5.03	6	-0.97	0.0148	0.725
9	110797352	110798042	691	4.59	3.81	5.09	-1.28	0.0149	0.725
2	123720602	123721255	654	4.73	4.05	5.19	-1.14	0.0149	0.725
11	94737298	94737683	386	4.62	3.91	5.1	-1.2	0.0149	0.725
6	45710358	45710967	610	4.6	3.94	5.05	-1.11	0.0149	0.725
7	70709844	70710592	749	6.85	6.24	7.27	-1.03	0.0149	0.725
3	158086828	158087287	460	4.23	3.51	4.71	-1.19	0.0149	0.725
9	5851445	5851841	397	5.54	4.87	6	-1.13	0.0149	0.726
5	35856469	35857204	736	4.51	3.88	4.95	-1.07	0.015	0.726
2	54575409	54576097	689	5.88	5.24	6.31	-1.07	0.015	0.726
4	68361085	68361614	530	4.55	3.77	5.06	-1.29	0.015	0.726
7	102102380	102102717	338	4.25	3.63	4.68	-1.04	0.015	0.726
8	119655161	119655501	341	4.08	3.43	4.53	-1.1	0.015	0.726
17	64081955	64082511	557	4.53	3.92	4.96	-1.04	0.015	0.726
5	119332984	119333631	648	4.74	4.06	5.21	-1.15	0.015	0.726
1	182803852	182804274	423	4.12	3.44	4.59	-1.15	0.015	0.726
1	43783128	43784484	1357	7.55	6.89	8	-1.11	0.015	0.726
10	124524892	124525274	383	4.9	4.27	5.33	-1.07	0.015	0.726
3	170992837	170993280	444	4.78	4.13	5.22	-1.09	0.015	0.726
2	144902975	144903694	720	4.45	3.85	4.87	-1.02	0.0151	0.727
3	42476680	42477372	693	6.29	5.72	6.7	-0.98	0.0151	0.727
1	99682264	99682851	588	5.12	4.56	5.52	-0.96	0.0151	0.727
18	14463354	14463894	541	4.93	4.22	5.41	-1.18	0.0151	0.728
11	124946508	124947167	660	4.36	3.74	4.79	-1.05	0.0152	0.728
10	56319373	56319911	539	5.08	4.43	5.52	-1.09	0.0152	0.728
2	106125006	106125672	667	4.21	3.53	4.67	-1.14	0.0152	0.729
21	26140150	26140544	395	4.29	3.61	4.75	-1.14	0.0152	0.729
16	48194861	48195565	705	6.78	6.13	7.23	-1.1	0.0152	0.729
8	51394724	51395376	653	5.51	4.97	5.9	-0.93	0.0152	0.729
14	87522500	87523207	708	6.83	6.15	7.3	-1.15	0.0152	0.729
2	65377550	65378205	656	5.81	5.21	6.23	-1.03	0.0153	0.729
1	237012828	237013409	582	4.49	3.82	4.94	-1.13	0.0153	0.729
3	156781571	156782179	609	4.3	3.65	4.74	-1.09	0.0153	0.729
1	230086960	230087332	373	5.18	4.59	5.61	-1.02	0.0153	0.729
12	12883146	12883931	786	5.66	4.98	6.11	-1.13	0.0153	0.73
10	95276185	95277190	1006	5.35	4.8	5.74	-0.94	0.0153	0.73
9	69645517	69645993	477	4.48	3.84	4.92	-1.08	0.0153	0.73
5	31975253	31975669	417	4.29	3.66	4.73	-1.07	0.0154	0.732
6	33752155	33752644	490	5.63	5.06	6.04	-0.98	0.0154	0.733
19	45781513	45782454	942	7.52	6.86	7.98	-1.12	0.0154	0.734
14	65255514	65255903	390	5.11	4.51	5.53	-1.01	0.0155	0.734
1	241482576	241483241	666	4.74	4.08	5.19	-1.12	0.0155	0.734
2	106143419	106144120	702	5.19	4.53	5.63	-1.11	0.0155	0.735
2	95273905	95275378	1474	7.34	6.72	7.78	-1.06	0.0155	0.735
11	105935742	105936218	477	4.33	3.71	4.76	-1.05	0.0156	0.735
15	50210150	50211232	1083	5.17	4.62	5.56	-0.94	0.0156	0.735
15	99998548	99999211	664	5.95	5.37	6.35	-0.98	0.0156	0.735
16	25879	26338	460	4.1	3.44	4.55	-1.11	0.0156	0.735
8	118140819	118141085	267	4.37	3.73	4.81	-1.07	0.0156	0.735
14	37048477	37049133	657	5.72	5.09	6.16	-1.07	0.0156	0.735
21	10769827	10770592	766	5.5	5.03	5.86	-0.83	0.0157	0.736
5	24823603	24824577	975	5.64	5.16	6	-0.84	0.0157	0.736
3	27217090	27217541	452	4.14	3.4	4.63	-1.23	0.0157	0.736
12	11801620	11802147	528	4.2	3.39	4.71	-1.32	0.0157	0.736
21	41704108	41704615	508	4.98	4.33	5.43	-1.1	0.0157	0.736
14	96215865	96216452	588	6.79	6.18	7.21	-1.03	0.0157	0.736
16	27263980	27264541	562	6.25	5.58	6.71	-1.13	0.0157	0.736
13	40402321	40402748	428	5.17	4.48	5.63	-1.15	0.0157	0.736
5	41414636	41414986	351	4.63	4	5.06	-1.07	0.0157	0.736
7	20385059	20385619	561	4.99	4.41	5.41	-1	0.0157	0.736
3	38001477	38001741	265	5.37	4.85	5.75	-0.9	0.0157	0.736
15	64521643	64522212	570	4.5	3.74	5	-1.26	0.0157	0.736
20	51742684	51743367	684	4.81	4.28	5.2	-0.92	0.0158	0.736
11	72174308	72174680	373	4.51	3.78	5	-1.22	0.0158	0.736
11	128809234	128809559	326	4.3	3.69	4.73	-1.05	0.0158	0.736
16	2995521	2995937	417	6.02	5.47	6.41	-0.95	0.0158	0.736
17	50511072	50511423	352	4.57	3.93	5.01	-1.08	0.0158	0.736
1	95650669	95651091	423	4.34	3.71	4.78	-1.06	0.0158	0.736
2	10270545	10270896	352	4.57	3.99	4.98	-0.98	0.0158	0.736
7	21550957	21551682	726	4.54	4	4.94	-0.94	0.0158	0.736
10	124705785	124706104	320	4.19	3.53	4.64	-1.11	0.0158	0.736
1	172746113	172746728	616	5.14	4.5	5.59	-1.08	0.0158	0.736
8	42126012	42126537	526	5.41	4.7	5.89	-1.19	0.0159	0.737
4	9924697	9925180	484	5.46	4.8	5.92	-1.12	0.0159	0.737
15	99435095	99435606	512	5.98	5.38	6.41	-1.03	0.0159	0.737
1	23589026	23589351	326	4	3.18	4.52	-1.34	0.0159	0.737
1	43766627	43767522	896	5.64	5.03	6.08	-1.05	0.0159	0.738
8	116012571	116012910	340	4.31	3.65	4.77	-1.12	0.016	0.739
12	5220905	5221226	322	4.12	3.43	4.58	-1.14	0.016	0.739
2	11562069	11562719	651	4.59	4	5	-1	0.016	0.739
9	32928071	32928508	438	4.36	3.71	4.8	-1.09	0.016	0.74
1	234188267	234188885	619	5.55	4.97	5.97	-1	0.016	0.74
20	11455054	11455829	776	4.26	3.58	4.72	-1.14	0.016	0.74
5	16455774	16456772	999	4.98	4.35	5.42	-1.07	0.0161	0.74
11	7597547	7598057	511	5.58	5.02	5.98	-0.97	0.0161	0.74
7	115584973	115585770	798	5.67	5.15	6.05	-0.89	0.0161	0.74
7	99210330	99210617	288	4.37	3.7	4.82	-1.12	0.0161	0.74
10	124355008	124355378	371	4.82	4.2	5.26	-1.06	0.0161	0.74
4	16140777	16141839	1063	4.99	4.44	5.39	-0.96	0.0161	0.74
13	29454777	29455413	637	4.97	4.41	5.38	-0.97	0.0161	0.74
11	27464280	27464735	456	4.33	3.67	4.79	-1.12	0.0161	0.74
8	123447784	123448125	342	4.58	3.93	5.02	-1.09	0.0161	0.74
3	180250120	180250763	644	5.3	4.6	5.77	-1.17	0.0161	0.74
3	22713840	22714320	481	4.63	4.03	5.06	-1.03	0.0161	0.74
8	1745437	1746491	1055	6.22	5.61	6.65	-1.04	0.0161	0.74
3	196279251	196279989	739	6.51	5.88	6.95	-1.07	0.0162	0.74
4	27349924	27350535	612	4.69	3.98	5.17	-1.19	0.0162	0.741
17	82217712	82218007	296	6.09	5.5	6.51	-1.01	0.0162	0.741
2	100291108	100292540	1433	6.31	5.75	6.71	-0.96	0.0162	0.741
21	34792269	34793036	768	4.3	3.65	4.74	-1.1	0.0162	0.742
6	47034606	47035410	805	5.62	4.99	6.06	-1.07	0.0163	0.742
12	45299110	45299740	631	4.87	4.29	5.29	-0.99	0.0163	0.742
5	145946235	145946884	650	5.43	4.79	5.87	-1.08	0.0163	0.742
2	111356503	111357230	728	4.41	3.66	4.9	-1.24	0.0163	0.742
1	116642616	116643809	1194	6.51	5.96	6.91	-0.95	0.0163	0.742
8	89558711	89559529	819	5.07	4.46	5.51	-1.05	0.0163	0.742
1	26861957	26862213	257	5.77	5.14	6.21	-1.08	0.0163	0.742
2	106192815	106193248	434	4.65	4.07	5.06	-1	0.0163	0.742
6	43481156	43481414	259	4.41	3.73	4.87	-1.15	0.0164	0.742
20	19976871	19977338	468	4.96	4.35	5.39	-1.03	0.0164	0.742
7	101941944	101942367	424	5.23	4.56	5.69	-1.13	0.0164	0.742
13	45512119	45512710	592	4.27	3.59	4.73	-1.14	0.0164	0.742
11	125070747	125071164	418	4.75	4.1	5.2	-1.1	0.0164	0.742
9	136695376	136695813	438	7.53	6.9	7.97	-1.07	0.0164	0.742
14	36238516	36239009	494	5.17	4.56	5.6	-1.03	0.0164	0.742
12	7825732	7826355	624	4.98	4.25	5.47	-1.22	0.0164	0.742
2	159147055	159147762	708	4.84	4.31	5.24	-0.93	0.0164	0.742
1	153365241	153365686	446	5.07	4.5	5.48	-0.97	0.0164	0.742
11	57791154	57791821	668	5.77	5.21	6.17	-0.96	0.0164	0.742
7	157317979	157318672	694	5.36	4.77	5.78	-1.01	0.0165	0.742
15	21110227	21110812	586	5.06	4.55	5.44	-0.89	0.0165	0.742
5	38806726	38807301	576	5.57	5.01	5.97	-0.96	0.0165	0.742
9	119453409	119454159	751	4.63	3.96	5.09	-1.13	0.0165	0.742
7	24906013	24906466	454	4.34	3.75	4.76	-1	0.0165	0.742
14	65070357	65070994	638	5.7	5.16	6.09	-0.94	0.0165	0.742
1	9644743	9645173	431	4.12	3.29	4.65	-1.36	0.0166	0.742
6	29813811	29814166	356	4.91	4.39	5.3	-0.91	0.0166	0.742
8	101026287	101026596	310	5.23	4.68	5.62	-0.94	0.0166	0.742
5	38782978	38783857	880	5.93	5.34	6.35	-1	0.0166	0.742
1	168082183	168082734	552	4.77	4.22	5.17	-0.95	0.0166	0.742
1	241688761	241689321	561	5.79	5.09	6.26	-1.17	0.0166	0.742
7	108340701	108341377	677	4.15	3.44	4.62	-1.17	0.0166	0.742
7	140656550	140656927	378	4.31	3.59	4.79	-1.2	0.0166	0.742
2	179066453	179067285	833	4.21	3.57	4.65	-1.08	0.0166	0.742
9	94792751	94793537	787	4.64	4.02	5.08	-1.06	0.0166	0.742
16	56742561	56742937	377	4.23	3.58	4.68	-1.1	0.0166	0.742
3	120160030	120160416	387	4.84	4.25	5.26	-1	0.0166	0.742
9	12814114	12814846	733	6.52	5.82	6.98	-1.16	0.0166	0.742
15	75046881	75047645	765	5.91	5.4	6.28	-0.88	0.0166	0.742
10	88385401	88386110	710	6.12	5.39	6.6	-1.21	0.0167	0.744
12	3770695	3771399	705	4.66	4.08	5.07	-1	0.0167	0.744
12	9418043	9418659	617	4.73	4.2	5.12	-0.92	0.0167	0.744
14	51488583	51489324	742	4.93	4.23	5.4	-1.17	0.0167	0.744
16	84735864	84736296	433	4.73	4.04	5.19	-1.15	0.0167	0.744
2	55992427	55992922	496	4.03	3.26	4.53	-1.26	0.0167	0.744
10	96271388	96271889	502	5.14	4.52	5.58	-1.06	0.0167	0.744
12	87425920	87426345	426	4.38	3.68	4.85	-1.17	0.0168	0.744
8	73793616	73794058	443	4.06	3.18	4.61	-1.43	0.0168	0.744
3	31947455	31948268	814	4.41	3.84	4.82	-0.99	0.0168	0.744
5	93563795	93564527	733	4.51	3.8	4.98	-1.18	0.0168	0.744
8	69643691	69644390	700	5.05	4.44	5.48	-1.04	0.0168	0.744
13	33261948	33262496	549	5.41	4.8	5.84	-1.05	0.0168	0.744
16	66858998	66859340	343	4.5	3.87	4.94	-1.07	0.0168	0.744
12	46983098	46984240	1143	5.45	4.9	5.84	-0.94	0.0168	0.744
13	30740038	30740496	459	5.32	4.7	5.75	-1.05	0.0169	0.744
16	28752278	28753027	750	4.81	4.2	5.23	-1.03	0.0169	0.744
1	17559682	17560078	397	4.53	3.96	4.93	-0.98	0.0169	0.744
15	44102661	44103258	598	4.51	3.75	5.01	-1.26	0.0169	0.744
X	134948436	134949124	689	4.26	3.66	4.68	-1.02	0.0169	0.744
6	5866452	5867170	719	5.54	4.91	5.98	-1.06	0.0169	0.744
10	95211690	95212276	587	4.73	4.11	5.16	-1.06	0.0169	0.744
11	85889999	85890428	430	4.36	3.61	4.85	-1.23	0.0169	0.744
10	71868088	71868596	509	5.95	5.3	6.39	-1.09	0.0169	0.744
X	118975924	118976944	1021	5.57	5.01	5.97	-0.96	0.0169	0.744
11	94746722	94747047	326	4.63	3.98	5.08	-1.1	0.0169	0.744
14	68939906	68940371	466	7.03	6.31	7.5	-1.19	0.0169	0.745
8	78116527	78116865	339	4.39	3.66	4.88	-1.22	0.017	0.746
5	33147989	33148872	884	4.91	4.18	5.39	-1.21	0.017	0.746
5	17805362	17805883	522	5.41	4.79	5.84	-1.05	0.017	0.746
21	15706665	15707149	485	4.36	3.55	4.87	-1.33	0.017	0.746
6	41536713	41537267	555	5.3	4.75	5.69	-0.94	0.017	0.746
3	151815962	151816378	417	5	4.43	5.4	-0.97	0.0171	0.746
6	31711177	31711787	611	5.46	4.94	5.83	-0.89	0.0171	0.746
3	19901805	19902360	556	4.56	3.84	5.03	-1.2	0.0171	0.746
3	112801451	112802113	663	5.23	4.68	5.63	-0.96	0.0171	0.746
11	43589727	43590343	617	3.99	3.35	4.44	-1.09	0.0171	0.746
12	14240173	14240777	605	5.46	4.85	5.88	-1.03	0.0171	0.746
17	81314444	81314980	537	5.86	5.33	6.24	-0.92	0.0171	0.746
18	29164052	29164624	573	4.17	3.47	4.64	-1.16	0.0171	0.746
10	121577641	121578077	437	4.08	3.34	4.57	-1.23	0.0172	0.746
9	34603546	34604028	483	4.37	3.71	4.83	-1.12	0.0172	0.746
21	35499091	35499878	788	5.44	4.9	5.83	-0.93	0.0172	0.746
3	177449331	177450054	724	7.58	6.84	8.06	-1.22	0.0172	0.746
22	17810597	17811155	559	3.99	3.21	4.49	-1.27	0.0172	0.746
3	14472507	14473401	895	6.36	5.85	6.73	-0.88	0.0172	0.746
9	133881169	133881621	453	6.47	5.92	6.87	-0.95	0.0172	0.746
6	144797870	144798653	784	4.96	4.3	5.41	-1.11	0.0172	0.746
8	90563546	90564170	625	5.01	4.44	5.42	-0.97	0.0172	0.746
3	154464531	154465121	591	4.66	4.06	5.09	-1.03	0.0173	0.747
3	30659276	30659817	542	5.18	4.55	5.61	-1.06	0.0173	0.747
6	40906812	40907073	262	4.03	3.26	4.54	-1.28	0.0173	0.747
5	145976538	145977073	536	4.79	4.2	5.2	-1	0.0173	0.747
19	47583123	47583610	488	4.57	3.87	5.03	-1.16	0.0173	0.747
1	171817588	171818576	989	5.43	4.89	5.83	-0.94	0.0173	0.747
22	46977915	46978294	380	5.62	5.15	5.98	-0.83	0.0173	0.747
16	71019087	71019630	544	4.16	3.43	4.65	-1.22	0.0173	0.747
8	100768753	100769177	425	4.68	4.09	5.09	-1.01	0.0174	0.747
6	31007699	31008253	555	4.68	3.92	5.17	-1.25	0.0174	0.747
17	82216316	82217098	783	8.22	7.57	8.67	-1.11	0.0174	0.747
3	159422943	159423725	783	5.86	5.3	6.26	-0.96	0.0174	0.747
16	4795200	4795999	800	5.87	5.38	6.23	-0.85	0.0174	0.747
10	4733113	4733903	791	6.3	5.65	6.75	-1.11	0.0174	0.747
8	141043264	141043652	389	5.22	4.67	5.61	-0.95	0.0174	0.747
1	202108289	202108716	428	6.13	5.58	6.53	-0.95	0.0174	0.748
17	63675422	63676514	1093	5.79	5.21	6.2	-1	0.0175	0.75
13	33679086	33679679	594	4.08	3.29	4.58	-1.29	0.0175	0.75
5	17228669	17229381	713	5.76	5.13	6.2	-1.06	0.0175	0.75
2	117525336	117526209	874	5.23	4.71	5.62	-0.92	0.0175	0.75
6	41846576	41847087	512	5.04	4.49	5.44	-0.95	0.0175	0.75
1	158019131	158019866	736	5.33	4.8	5.71	-0.91	0.0176	0.751
9	99873404	99873945	542	4.23	3.47	4.72	-1.25	0.0176	0.751
7	151573088	151573507	420	4.13	3.48	4.57	-1.09	0.0176	0.751
3	13484994	13485746	753	6.09	5.51	6.5	-0.98	0.0176	0.751
5	175770411	175771074	664	4.11	3.48	4.55	-1.06	0.0176	0.751
16	57377108	57377788	681	6.09	5.52	6.5	-0.98	0.0176	0.752
10	13969053	13969578	526	4.86	4.26	5.29	-1.03	0.0176	0.752
15	37289157	37289711	555	3.97	3.23	4.46	-1.23	0.0176	0.752
9	7146622	7146995	374	4.99	4.36	5.42	-1.06	0.0177	0.752
21	38487989	38488981	993	5.25	4.6	5.69	-1.09	0.0177	0.752
20	47950031	47950494	464	5.1	4.56	5.49	-0.92	0.0177	0.752
21	43281272	43281599	328	4.12	3.34	4.62	-1.28	0.0177	0.752
7	138727174	138727680	507	4.56	3.91	5.01	-1.11	0.0177	0.752
5	36200523	36200865	343	4.25	3.5	4.74	-1.23	0.0177	0.752
3	24128585	24129027	443	4.14	3.28	4.67	-1.39	0.0177	0.752
7	17261236	17261654	419	4.2	3.56	4.64	-1.08	0.0177	0.752
8	119086405	119086762	358	5.19	4.63	5.6	-0.97	0.0178	0.752
4	98626079	98626766	688	4.84	4.2	5.29	-1.09	0.0178	0.753
2	60260712	60261238	527	4.23	3.63	4.66	-1.03	0.0178	0.753
6	71489727	71490159	433	4.13	3.26	4.67	-1.41	0.0178	0.753
10	35040874	35041898	1025	4.6	4.03	5.01	-0.99	0.0178	0.753
12	115584032	115584764	733	4.33	3.75	4.74	-1	0.0179	0.753
6	163634488	163635405	918	6.53	5.95	6.94	-0.99	0.0179	0.753
13	36986604	36987475	872	5.37	4.8	5.78	-0.98	0.0179	0.753
12	30457659	30458025	367	4.02	3.22	4.53	-1.3	0.0179	0.753
10	71255815	71256512	698	5.91	5.39	6.3	-0.91	0.0179	0.754
10	21194473	21195018	546	4.78	4.18	5.21	-1.03	0.0179	0.754
18	23101788	23102179	392	4.55	3.92	4.99	-1.07	0.0179	0.754
3	118262730	118263426	697	5.16	4.51	5.6	-1.09	0.018	0.754
8	48501247	48502016	770	6.98	6.32	7.43	-1.11	0.018	0.754
11	68146054	68146426	373	5.91	5.36	6.32	-0.96	0.018	0.754
19	57850605	57850942	338	4.2	3.51	4.66	-1.15	0.018	0.754
5	95081492	95081856	365	4.39	3.74	4.84	-1.1	0.018	0.754
8	103120160	103120655	496	4.94	4.34	5.36	-1.02	0.018	0.754
8	53938755	53939428	674	6.92	6.28	7.36	-1.08	0.018	0.754
14	77314005	77314692	688	6.75	6.23	7.13	-0.9	0.018	0.754
11	9815734	9816130	397	4.18	3.43	4.67	-1.23	0.018	0.754
2	159249779	159250348	570	4.89	4.22	5.35	-1.13	0.018	0.754
8	118122025	118122587	563	5.47	4.92	5.87	-0.95	0.018	0.754
3	157879349	157880198	850	5.97	5.47	6.35	-0.88	0.0181	0.754
10	117736500	117737093	594	4.93	4.37	5.33	-0.95	0.0181	0.754
16	24748243	24748599	357	4.06	3.27	4.57	-1.31	0.0181	0.754
3	196135547	196136889	1343	6.75	6.19	7.15	-0.97	0.0181	0.754
15	92510240	92510715	476	4.36	3.79	4.77	-0.98	0.0181	0.754
1	156926212	156926629	418	5.12	4.5	5.55	-1.05	0.0181	0.754
17	80243830	80244391	562	5.21	4.7	5.58	-0.87	0.0181	0.754
4	184400294	184400866	573	4.22	3.58	4.66	-1.08	0.0181	0.754
12	93229424	93229877	454	5.02	4.48	5.42	-0.93	0.0181	0.754
7	56196052	56196818	767	7.14	6.5	7.58	-1.09	0.0181	0.754
8	54212144	54212634	491	4.5	3.89	4.94	-1.05	0.0182	0.754
2	135948322	135949118	797	5.47	4.88	5.88	-1	0.0182	0.754
2	172783008	172783841	834	5.09	4.48	5.51	-1.03	0.0182	0.754
2	205754726	205755356	631	5.22	4.69	5.61	-0.92	0.0182	0.754
15	54931234	54932082	849	4.54	3.85	5	-1.15	0.0182	0.754
18	9779617	9780101	485	4.31	3.6	4.78	-1.18	0.0182	0.754
7	152872447	152873387	941	5.1	4.58	5.48	-0.9	0.0182	0.754
5	42772278	42772917	640	4.78	4.02	5.28	-1.25	0.0183	0.754
1	145964301	145964974	674	6.38	5.76	6.81	-1.05	0.0183	0.754
3	22564060	22564537	478	4.08	3.4	4.53	-1.13	0.0183	0.754
3	12405688	12406192	505	4.55	3.89	5	-1.11	0.0183	0.754
4	6955466	6955996	531	4.8	4.16	5.24	-1.08	0.0183	0.754
3	110814094	110814666	573	4.28	3.56	4.76	-1.2	0.0183	0.754
8	71253566	71253953	388	4.13	3.35	4.63	-1.29	0.0184	0.754
8	56889964	56890530	567	5.45	4.89	5.86	-0.97	0.0184	0.754
14	64998586	64998979	394	4.84	4.19	5.29	-1.09	0.0184	0.754
3	9497892	9498630	739	5.62	5.08	6.02	-0.94	0.0184	0.754
7	139041198	139042369	1172	5.82	5.31	6.19	-0.88	0.0184	0.754
7	21579853	21580727	875	4.66	4.1	5.07	-0.97	0.0184	0.754
8	141338562	141339000	439	6.33	5.72	6.75	-1.04	0.0184	0.754
3	170726192	170727345	1154	6	5.47	6.39	-0.92	0.0184	0.754
3	165855597	165856043	447	4.76	4.19	5.17	-0.99	0.0184	0.754
16	10334273	10334870	598	4.63	3.98	5.08	-1.1	0.0184	0.754
15	35018963	35019722	760	5.41	4.74	5.87	-1.13	0.0184	0.754
8	107497082	107497606	525	4.57	3.97	4.99	-1.02	0.0184	0.754
9	7093883	7094357	475	4.18	3.52	4.62	-1.11	0.0185	0.754
11	130847310	130848018	709	5.82	5.31	6.2	-0.88	0.0185	0.754
22	45703560	45704215	656	7.01	6.42	7.42	-1	0.0185	0.754
13	113784929	113785517	589	5.84	5.19	6.28	-1.09	0.0185	0.754
1	208107578	208108537	960	6.59	5.96	7.03	-1.07	0.0185	0.754
3	182609477	182610140	664	6.56	5.85	7.03	-1.18	0.0185	0.754
16	68665552	68665846	295	5.03	4.45	5.44	-0.98	0.0185	0.754
21	38839735	38840297	563	4.07	3.42	4.52	-1.11	0.0186	0.756
9	94937498	94937841	344	4.48	3.86	4.91	-1.05	0.0186	0.756
9	82140422	82140906	485	4.07	3.31	4.57	-1.25	0.0186	0.757
19	19602707	19603223	517	4.86	4.33	5.25	-0.92	0.0186	0.757
3	45915937	45916477	541	4.24	3.64	4.66	-1.01	0.0187	0.758
9	96266676	96267228	553	5.2	4.66	5.59	-0.93	0.0187	0.759
2	234694346	234695372	1027	5.09	4.38	5.56	-1.18	0.0187	0.759
6	3511176	3511960	785	6.54	5.93	6.96	-1.03	0.0187	0.759
3	46660661	46661338	678	4.91	4.35	5.32	-0.97	0.0187	0.759
5	132427437	132428039	603	5.04	4.5	5.43	-0.93	0.0188	0.76
X	104565907	104566843	937	4.05	3.41	4.48	-1.07	0.0188	0.761
9	92954077	92954495	419	4.57	3.92	5.03	-1.11	0.0188	0.761
3	127403363	127403662	300	4.26	3.63	4.7	-1.07	0.0189	0.761
11	88410666	88411577	912	4.8	4.16	5.24	-1.08	0.0189	0.761
15	64574224	64574639	416	4.41	3.76	4.85	-1.09	0.0189	0.761
1	152774888	152775358	471	4.42	3.82	4.85	-1.03	0.0189	0.761
20	49768363	49768672	310	4.01	3.34	4.47	-1.13	0.0189	0.761
2	137255803	137256573	771	5.38	4.86	5.76	-0.9	0.0189	0.761
5	45748370	45749251	882	6.22	5.69	6.61	-0.92	0.019	0.761
4	2402072	2402557	486	4.74	4.13	5.17	-1.04	0.019	0.761
2	176171881	176172503	623	4.03	3.41	4.46	-1.05	0.019	0.761
11	59786949	59787525	577	5.66	5.02	6.11	-1.09	0.019	0.761
15	91491133	91491723	591	4.35	3.77	4.76	-0.99	0.019	0.761
5	118569315	118569988	674	4.63	3.95	5.09	-1.13	0.019	0.761
8	105498694	105499617	924	5.16	4.62	5.56	-0.94	0.019	0.761
3	36149382	36149925	544	4.45	3.82	4.89	-1.07	0.019	0.761
2	122720381	122721237	857	4.04	3.39	4.49	-1.1	0.019	0.761
6	135258985	135259359	375	4.08	3.39	4.54	-1.16	0.0191	0.761
5	98880116	98880852	737	4.72	4.12	5.15	-1.03	0.0191	0.761
11	129846335	129847316	982	6.79	6.12	7.24	-1.12	0.0191	0.761
9	95197471	95198142	672	4.15	3.54	4.58	-1.04	0.0191	0.761
12	53613606	53614170	565	4.01	3.35	4.46	-1.11	0.0191	0.761
16	73015605	73016029	425	4.92	4.33	5.33	-1	0.0191	0.761
1	3553367	3553795	429	5.9	5.35	6.29	-0.94	0.0191	0.761
11	123590489	123591137	649	5.36	4.86	5.73	-0.87	0.0191	0.761
3	36908351	36908716	366	4.78	4.18	5.2	-1.02	0.0191	0.761
16	65731866	65732213	348	4.27	3.61	4.73	-1.12	0.0191	0.761
3	197855029	197855403	375	4.11	3.34	4.6	-1.26	0.0192	0.761
1	25871356	25872043	688	6.23	5.67	6.63	-0.97	0.0192	0.761
3	184645170	184645755	586	5.63	5.01	6.06	-1.05	0.0192	0.761
1	84089413	84089790	378	4.19	3.49	4.65	-1.17	0.0192	0.761
18	10094193	10094971	779	5.29	4.74	5.68	-0.95	0.0192	0.761
9	130539435	130540153	719	6.21	5.66	6.6	-0.94	0.0192	0.761
13	45253467	45253887	421	4.13	3.48	4.58	-1.1	0.0192	0.761
10	63115772	63116184	413	4.24	3.6	4.68	-1.08	0.0192	0.761
1	93015610	93016013	404	5.05	4.45	5.48	-1.03	0.0192	0.761
10	79083958	79084531	574	5.65	5.12	6.04	-0.93	0.0192	0.761
1	201311035	201312054	1020	6.81	6.22	7.22	-1	0.0193	0.761
1	200184176	200184597	422	4.94	4.33	5.36	-1.03	0.0193	0.761
15	95799659	95800247	589	5.23	4.64	5.64	-1	0.0193	0.761
15	76012312	76012640	329	4.16	3.41	4.65	-1.23	0.0193	0.761
19	16702039	16702522	484	4.89	4.28	5.32	-1.04	0.0193	0.761
17	57375589	57376314	726	6.08	5.47	6.51	-1.03	0.0193	0.761
8	30539936	30540382	447	4.89	4.29	5.32	-1.04	0.0193	0.761
7	48144221	48144709	489	4.17	3.55	4.61	-1.06	0.0193	0.761
14	24279453	24279910	458	4.77	4.22	5.18	-0.96	0.0193	0.761
8	65933081	65934046	966	5.9	5.36	6.29	-0.93	0.0193	0.761
3	122081543	122082005	463	5.22	4.66	5.62	-0.95	0.0193	0.761
17	78962339	78962694	356	4.62	4.06	5.02	-0.96	0.0194	0.761
15	56023244	56023526	283	4.3	3.66	4.74	-1.08	0.0194	0.761
2	26941455	26941872	418	3.98	3.29	4.44	-1.15	0.0194	0.761
8	142164964	142165619	656	4.99	4.51	5.35	-0.84	0.0194	0.761
13	105979181	105979847	667	4.69	4.06	5.13	-1.07	0.0194	0.761
1	7745765	7746225	461	4.42	3.73	4.89	-1.17	0.0194	0.761
9	5844823	5845146	324	4.22	3.5	4.69	-1.19	0.0194	0.761
18	8612119	8612663	545	4.78	4.24	5.18	-0.94	0.0194	0.761
6	116087323	116087885	563	5.08	4.53	5.48	-0.95	0.0194	0.761
6	138288554	138289137	584	5.28	4.64	5.73	-1.09	0.0194	0.761
12	75640915	75641494	580	4.59	3.91	5.05	-1.15	0.0194	0.761
8	54744174	54744719	546	4.86	4.2	5.3	-1.1	0.0194	0.761
2	24456649	24457024	376	4.27	3.68	4.68	-1.01	0.0194	0.761
5	76290219	76290849	631	5.14	4.54	5.57	-1.02	0.0194	0.761
3	155416530	155417458	929	6.96	6.35	7.38	-1.04	0.0194	0.761
8	132703383	132704084	702	5.97	5.46	6.35	-0.89	0.0194	0.761
15	94239453	94239807	355	4.55	3.93	4.98	-1.05	0.0195	0.761
10	84613063	84614026	964	5.55	5.08	5.91	-0.82	0.0195	0.761
5	111680672	111681352	681	5.04	4.49	5.43	-0.94	0.0195	0.762
5	131242671	131243315	645	4.61	3.99	5.05	-1.05	0.0195	0.762
19	17819622	17820218	597	4.29	3.57	4.77	-1.19	0.0195	0.763
18	59426826	59427252	427	5.09	4.57	5.47	-0.9	0.0195	0.763
1	236531643	236532077	435	4.87	4.17	5.33	-1.16	0.0196	0.763
2	83742339	83742865	527	4.85	4.25	5.27	-1.02	0.0196	0.763
6	113654360	113654879	520	5.84	5.16	6.3	-1.14	0.0196	0.763
3	161275788	161276708	921	5.81	5.25	6.21	-0.96	0.0196	0.763
8	121089346	121089715	370	4.16	3.43	4.64	-1.22	0.0196	0.763
17	82839838	82840179	342	5.71	5.14	6.11	-0.97	0.0196	0.763
1	205775087	205775908	822	5.49	4.95	5.88	-0.92	0.0196	0.763
12	59041162	59042096	935	6.45	5.79	6.91	-1.11	0.0197	0.764
2	62654038	62654764	727	4.33	3.63	4.8	-1.18	0.0197	0.764
6	154881953	154882520	568	4.55	4.03	4.94	-0.91	0.0197	0.764
3	188673738	188674233	496	5.36	4.68	5.82	-1.14	0.0197	0.764
18	70286285	70286783	499	4.39	3.78	4.81	-1.03	0.0197	0.764
11	126365421	126365849	429	4.45	3.86	4.87	-1.02	0.0197	0.764
12	26101292	26101763	472	4.67	4.13	5.06	-0.93	0.0198	0.764
X	65668351	65669005	655	4.99	4.39	5.41	-1.03	0.0198	0.764
9	137982240	137982624	385	5.84	5.33	6.22	-0.89	0.0198	0.764
12	3242131	3242947	817	5.85	5.4	6.19	-0.79	0.0198	0.764
5	41009125	41009633	509	4.79	4.14	5.23	-1.09	0.0198	0.764
13	18279833	18280496	664	5.07	4.53	5.46	-0.92	0.0198	0.764
2	208253967	208254585	619	5.65	5.11	6.05	-0.93	0.0198	0.764
16	62253956	62254688	733	5	4.43	5.41	-0.97	0.0198	0.764
4	72209665	72210084	420	4.85	4.3	5.24	-0.95	0.0198	0.764
4	105022675	105023320	646	4.13	3.5	4.57	-1.07	0.0199	0.764
6	150492448	150493281	834	6.9	6.24	7.34	-1.1	0.0199	0.765
7	121531557	121531959	403	4.16	3.43	4.63	-1.2	0.0199	0.765
8	94417762	94418158	397	4.83	4.19	5.26	-1.07	0.0199	0.765
21	43866574	43867094	521	5.5	5.04	5.84	-0.8	0.0199	0.765
2	113164580	113165117	538	4.71	4.17	5.1	-0.93	0.0199	0.765
16	84482058	84482372	315	4.4	3.82	4.81	-0.99	0.02	0.765
8	109281640	109282470	831	5.11	4.63	5.48	-0.85	0.02	0.765
15	39114711	39115969	1259	5.76	5.2	6.16	-0.96	0.02	0.765
3	171811544	171811884	341	5.76	5.14	6.19	-1.05	0.02	0.765
17	63780426	63780947	522	4.42	3.72	4.89	-1.16	0.02	0.765
9	14251174	14252012	839	6.47	5.8	6.92	-1.12	0.02	0.765
21	5095593	5096364	772	4.94	4.32	5.38	-1.06	0.02	0.765
12	64625218	64626000	783	5.3	4.73	5.7	-0.98	0.02	0.766
12	3497033	3497340	308	4.44	3.73	4.92	-1.18	0.0201	0.766
3	38247401	38247922	522	4.6	3.94	5.05	-1.1	0.0201	0.766
3	136952350	136952748	399	4.4	3.74	4.86	-1.12	0.0201	0.766
2	54673415	54673988	574	4.46	3.89	4.87	-0.98	0.0201	0.766
9	128683427	128683929	503	5.67	5.1	6.07	-0.97	0.0201	0.766
6	119620761	119621542	782	4.94	4.33	5.37	-1.04	0.0201	0.766
2	10285518	10285961	444	4.99	4.45	5.39	-0.94	0.0201	0.766
2	181977664	181978105	442	4.41	3.79	4.84	-1.05	0.0202	0.766
2	198440832	198441541	710	4.78	4.05	5.26	-1.21	0.0202	0.766
2	204842680	204843439	760	4.47	3.86	4.9	-1.04	0.0202	0.766
8	54381866	54382581	716	5.4	4.87	5.78	-0.91	0.0202	0.766
2	172643188	172643693	506	4.29	3.69	4.71	-1.02	0.0202	0.766
10	121158894	121159574	681	4.44	3.78	4.89	-1.11	0.0202	0.766
4	110663890	110664523	634	4.14	3.46	4.61	-1.15	0.0202	0.767
12	78928416	78928904	489	5.17	4.53	5.61	-1.08	0.0203	0.767
5	111461337	111461728	392	4.02	3.36	4.47	-1.12	0.0203	0.767
17	82534404	82534855	452	5.35	4.82	5.74	-0.92	0.0203	0.767
18	43034631	43035038	408	4.33	3.61	4.82	-1.21	0.0203	0.767
1	78665702	78666380	679	4.12	3.5	4.55	-1.05	0.0203	0.767
11	120132232	120132591	360	5.39	4.83	5.8	-0.97	0.0203	0.767
14	101480810	101481452	643	5.69	5.16	6.08	-0.93	0.0203	0.767
1	167544562	167545215	654	4.31	3.71	4.72	-1.01	0.0204	0.767
7	73833313	73833757	445	5.93	5.38	6.33	-0.94	0.0204	0.767
17	56887991	56888397	407	4.4	3.84	4.8	-0.95	0.0204	0.767
12	103799767	103800201	435	4.72	4.06	5.16	-1.1	0.0204	0.767
16	61323123	61323990	868	4.83	4.25	5.24	-0.99	0.0204	0.767
1	110098354	110099214	861	5.99	5.49	6.37	-0.88	0.0204	0.768
13	28309485	28310221	737	4.95	4.43	5.34	-0.91	0.0204	0.769
16	75322762	75323058	297	4.58	3.87	5.06	-1.2	0.0205	0.769
15	56568474	56569281	808	5.05	4.54	5.43	-0.89	0.0205	0.769
2	73939401	73939878	478	5.44	4.79	5.89	-1.1	0.0205	0.769
[truncated: 5,974 more rows]
