# Supplementary material for: The RNA-binding protein La/SSB drives head and neck squamous cell carcinoma progression through TFAP2C-mediated transcriptional activation of FSCN1
Source: Research Square preprint supplement (doi:10.21203/rs.3.rs-8395850/v1), 2026-01-21
Supplement: Supplementary file 2 [file af58f135b5f4197c58842a00.docx]

**SUPPLEMENTARY FIGURES**

**
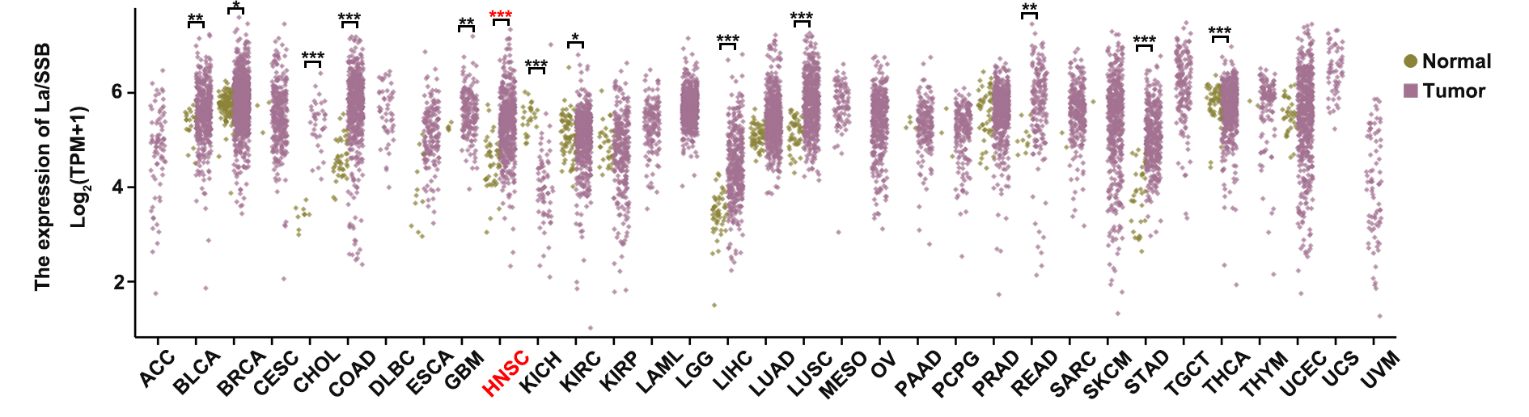
Figure S1. Pan-cancer expression profile of La/SSB in tumor versus ANM tissues from TCGA**

Boxplots illustrate the differential expression of La/SSB across various cancer types based on TCGA data. Tumor tissues are compared with adjacent normal (ANM) tissues, and expression levels are presented as log2-transformed TPM values. Error bars represent mean ± SD; *P < 0.05, ***P < 0.001.


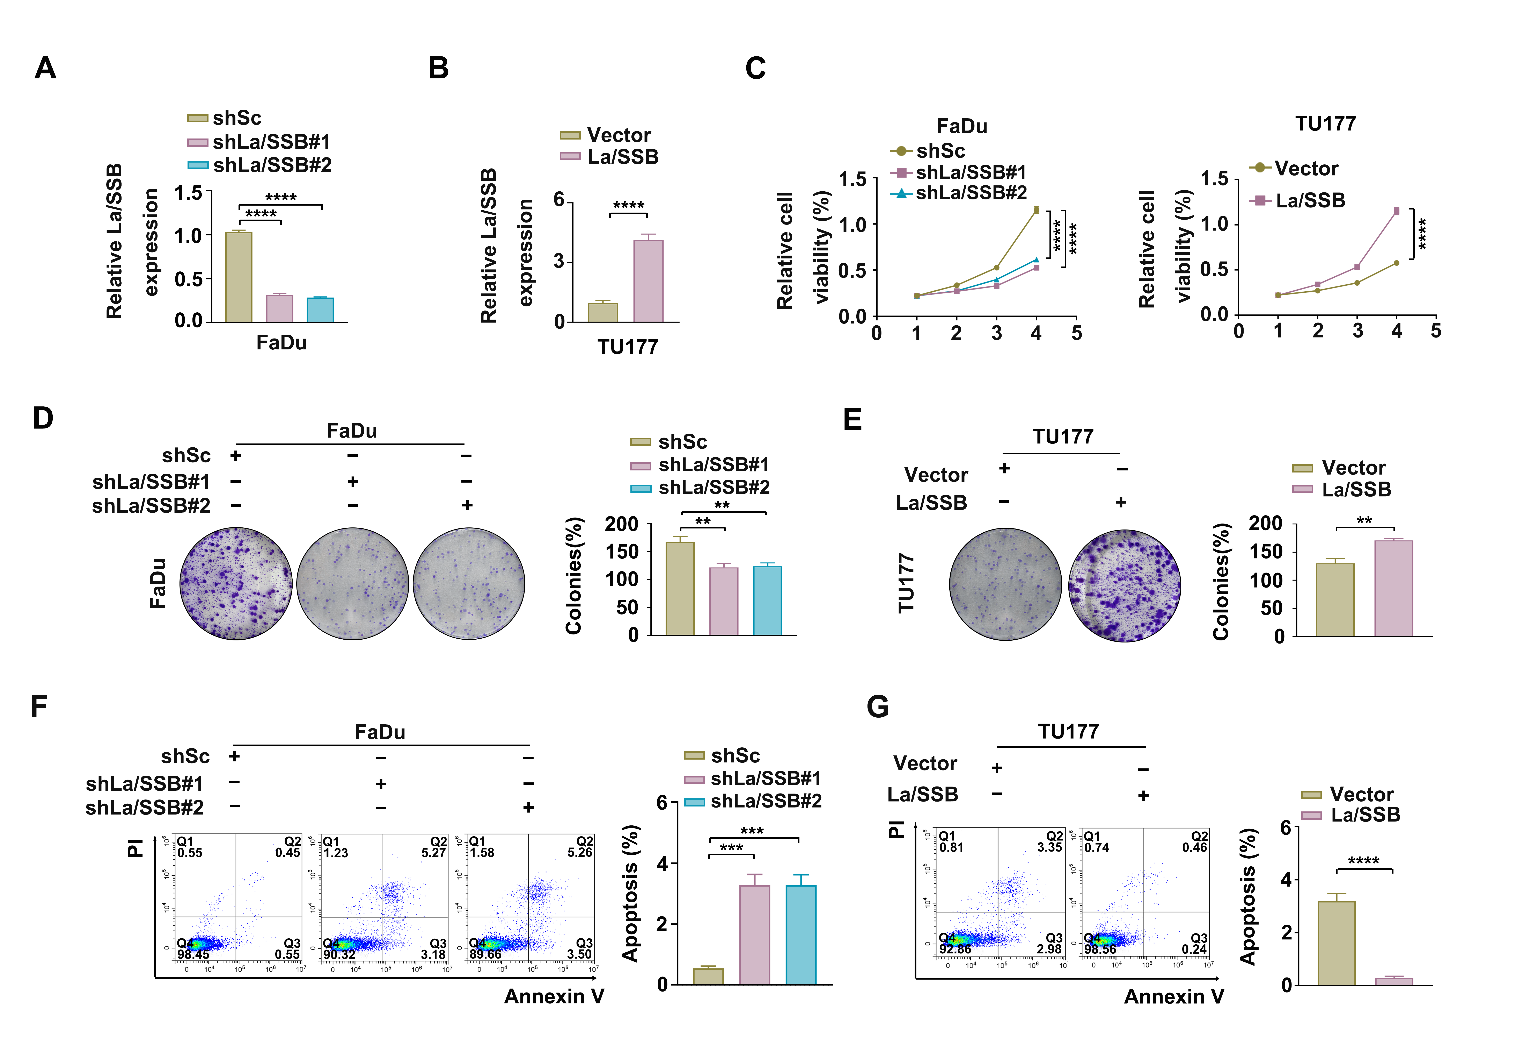


**Figure S2. La/SSB enhances tumorigenic capacity of HNSC cells in vitro.**

(**A** and **B**) FaDu cells were transduced with lentiviruses expressing shRNAs targeting La/SSB (shLa/SSB #1 and shLa/SSB #2) or a control scrambled sequence (shSc) (**A**). TU177 cells were transduced with either a control vector or lentiviruses encoding La/SSB (**B**). The expression levels of La/SSB were assessed using qRT-PCR. Error bars represent mean ± SD; ****P < 0.0001. (**C-E**) CCK-8 (**C**) and colony formation (**D** and **E**) were performed to evaluate cell proliferation. Scale bar, 100 μm. (**E** and **F**) Cells were analyzed for apoptosis using flow cytometry. Error bars represent mean ± SD. ***P < 0.001, ****P < 0.0001.


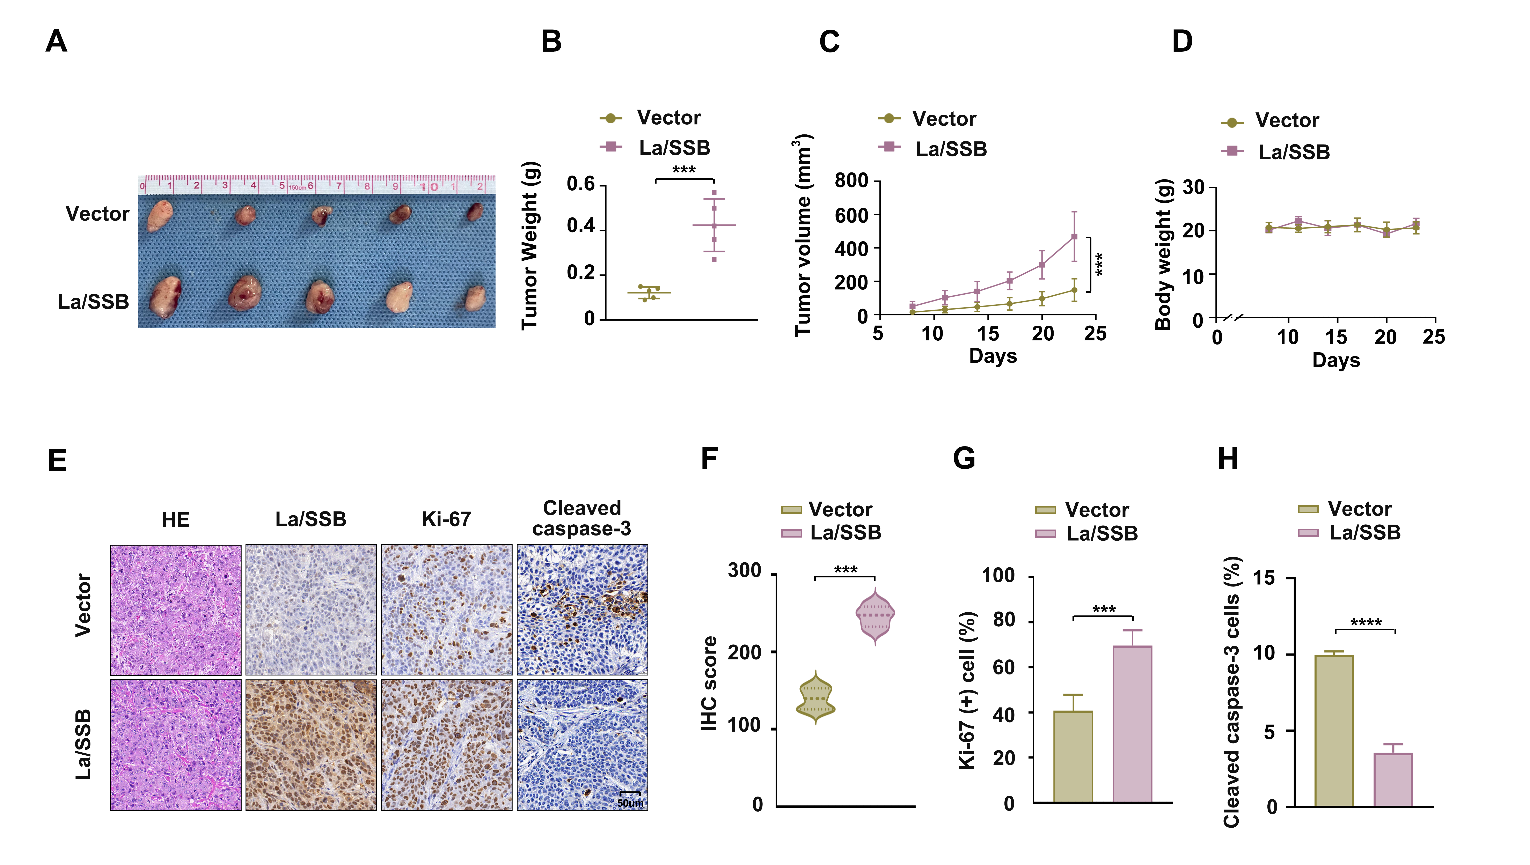


**Figure S3. Overexpression of La/SSB promotes tumor cell proliferation *in vivo*.**

(**A**-**H**) The indicated TU177 cells were subcutaneously injected into mice for monitoring tumor growth. Tumor images **(A)**, tumor weight **(B)**, tumor volume **(C)**, body weight (**D**), and representative IHC images of La/SSB, Ki-67 and Cleaved caspase-3 (**E**) were shown. Scale bars, 50 µm.The quantitative analysis results for La/SSB, Ki-67 and Cleaved caspase-3 (**F** -**H**). Error bars, mean ± SD (n = 5 mice/group). ***P < 0.001, ****p<0.0001.

**
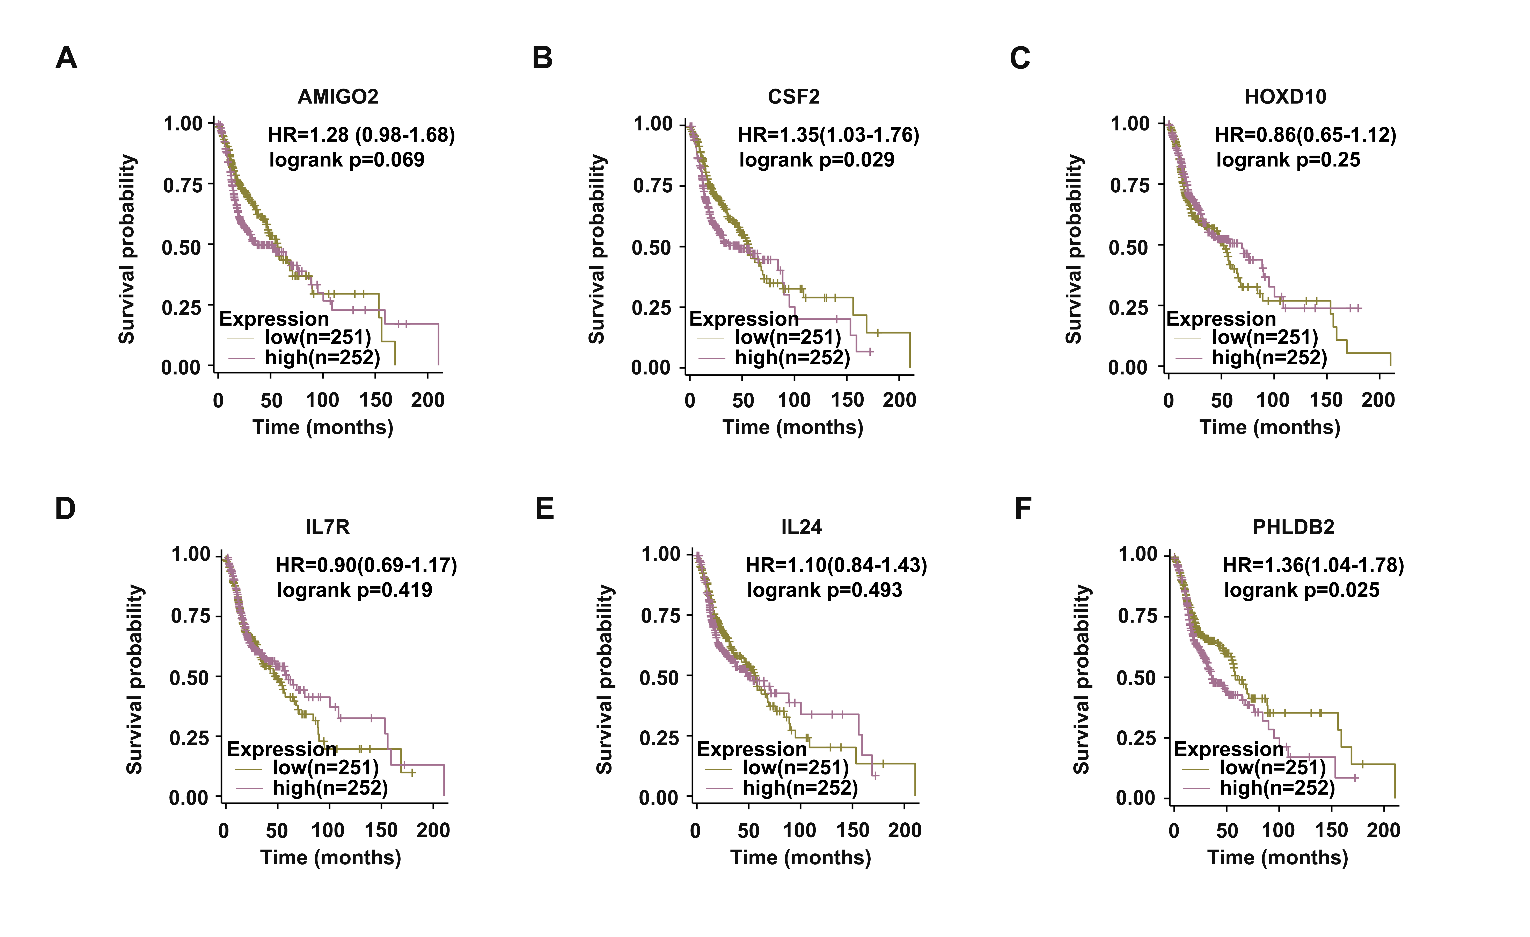
**

**Figure S4. Analyze the expression profiles of the specified genes and their association with patient survival using the TCGA-HNSC dataset.**

Kaplan-Meier survival analysis was conducted for HNSCC patients in the TCGA dataset, stratified into high (n = 251) and low (n = 252) expression groups based on the median expression levels of AMIGO2, CSF2, HOXD10, IL7R, IL24, and PHLDB2.

**
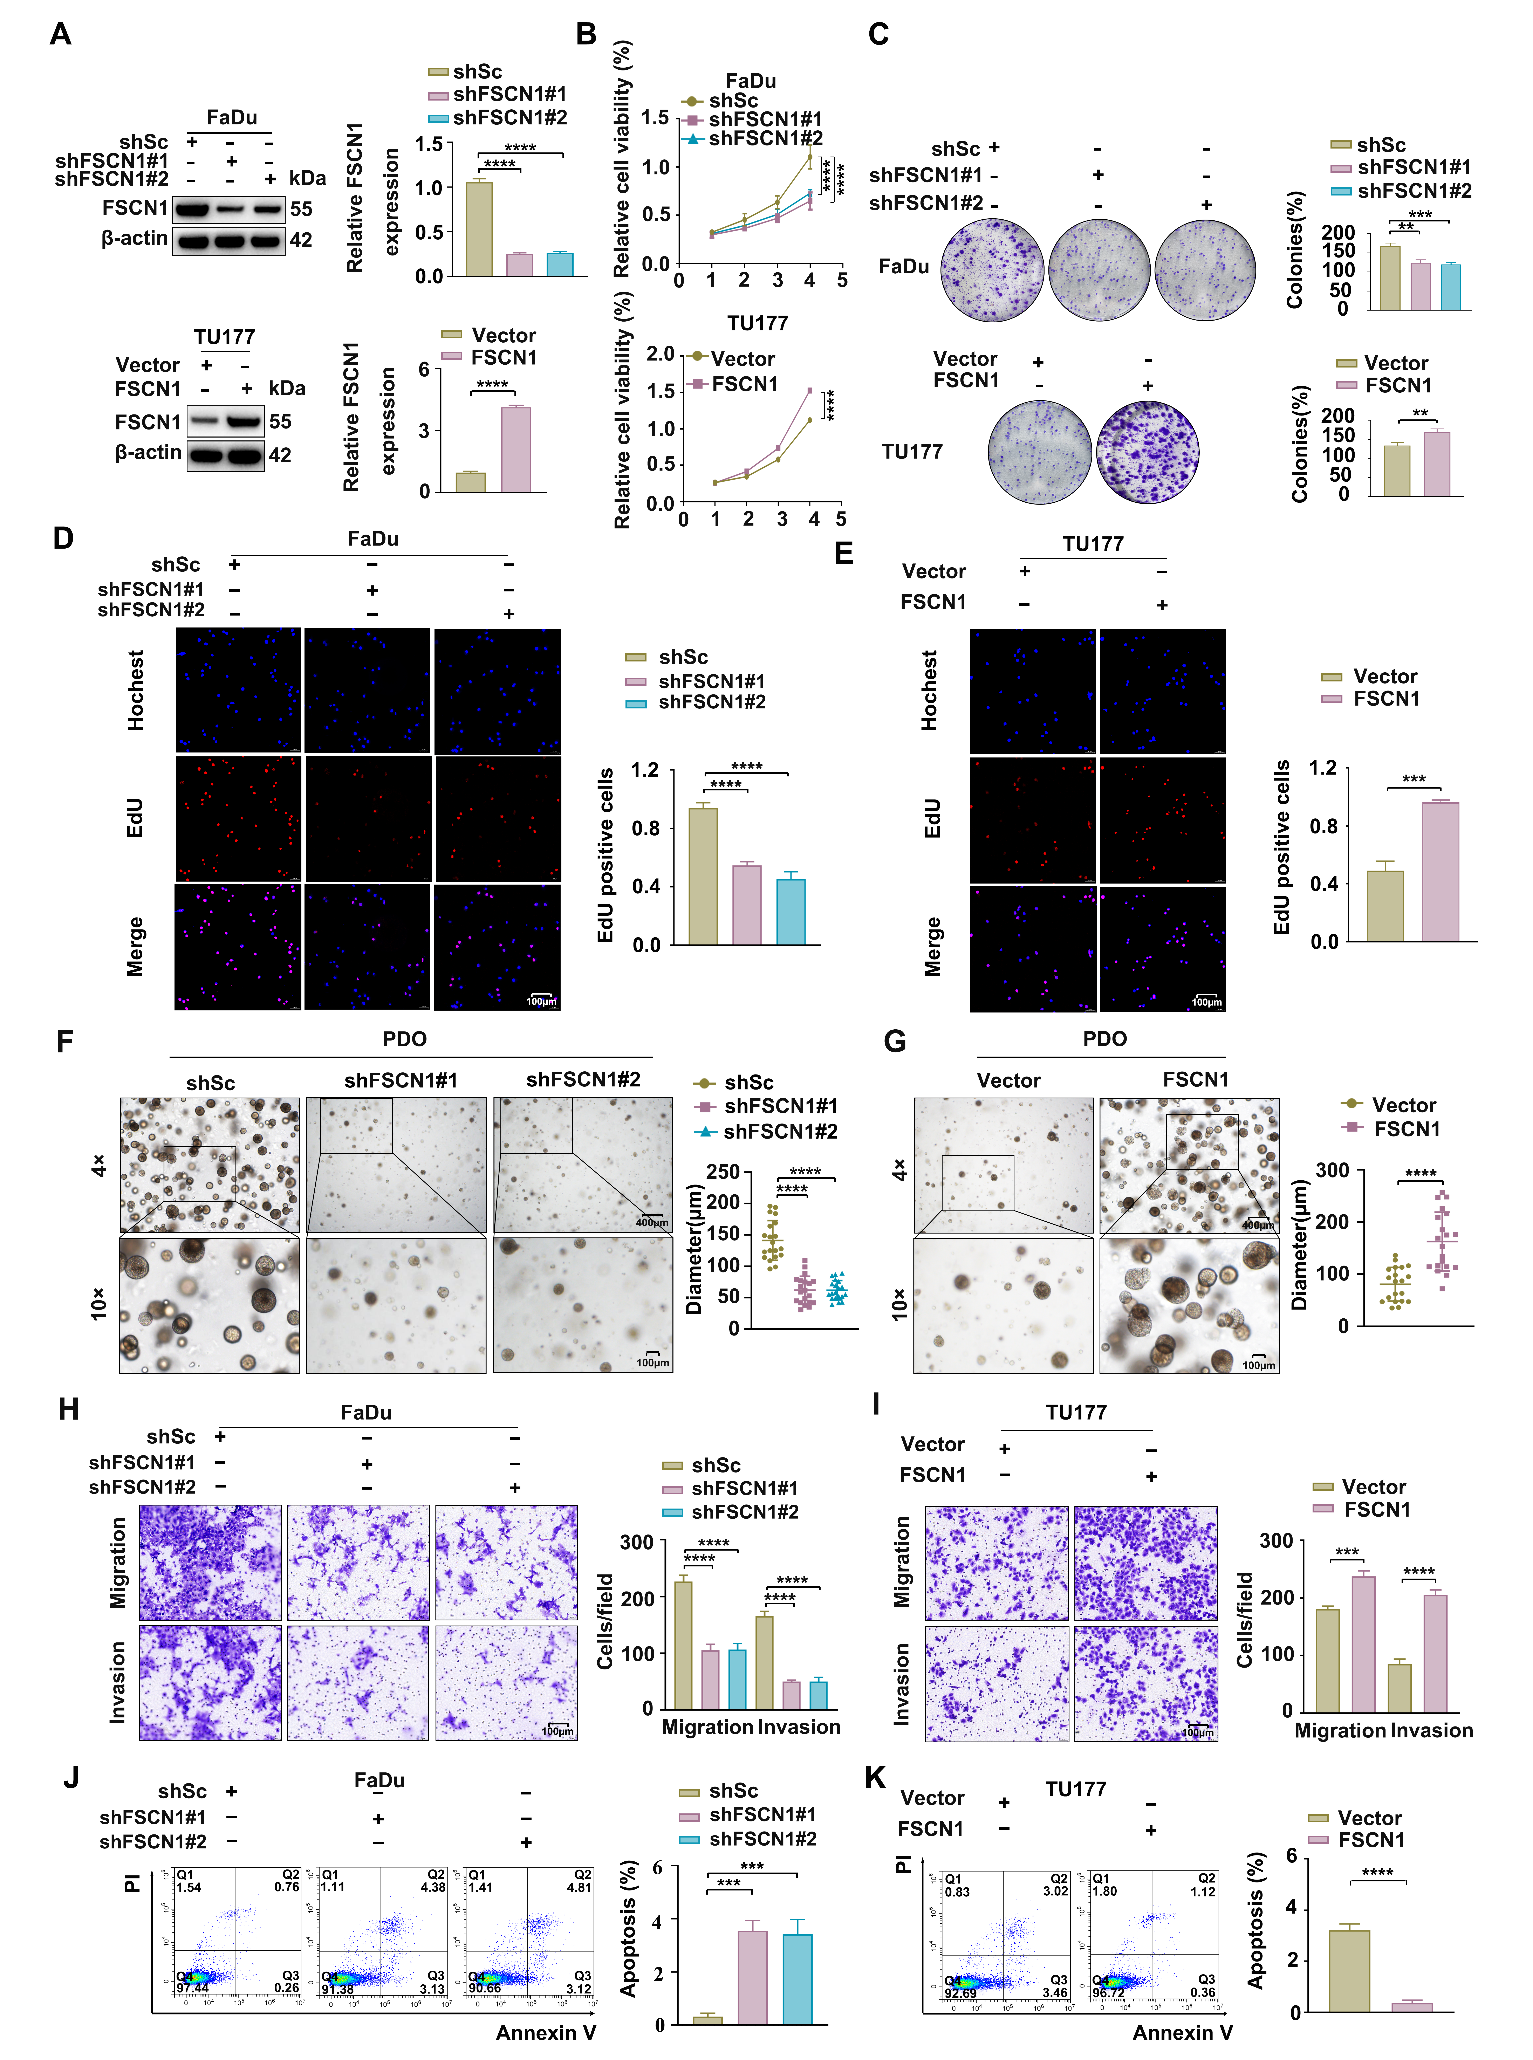
**

**Figure S5.** **FSCN1 exhibits tumor promoter activities in HNSC cells.**

(**A**) FaDu cells were transduced with lentiviruses expressing shRNAs targeting FSCN1 (shFSCN1#1 and sh FSCN1#2) or a control scrambled sequence (shSc). TU177 cells were transduced with either a control vector or lentiviruses encoding FSCN1. CCK-8 (**B**), colony formation (**C**) and EdU assays (**D** and **E**) were performed to evaluate cell proliferation. (**F** and **G**) Representative images of organoid diameter after knockdown or over-expression of FSCN1. Scale bar: 400 μm (low-magnification), 100 μm (high-magnification). Statistics of tumor organoid diameter (*n*=30). Error bars indicate mean ± SD. ****P < 0.0001. (**H** and **I**) Transwell assays showed the migration and invasion rates in FSCN1-knockdown FaDu cells and FSCN1-overexpressing TU177 cells. Scale bar: 100 μm. Error bars represent mean ± SD. ****P*<0.001, ****P < 0.0001. (**J** and **K**) Cells were analyzed for apoptosis using flow cytometry. Error bars represent mean ± SD. **P < 0.05, ***P < 0.001, ****P < 0.0001.

**
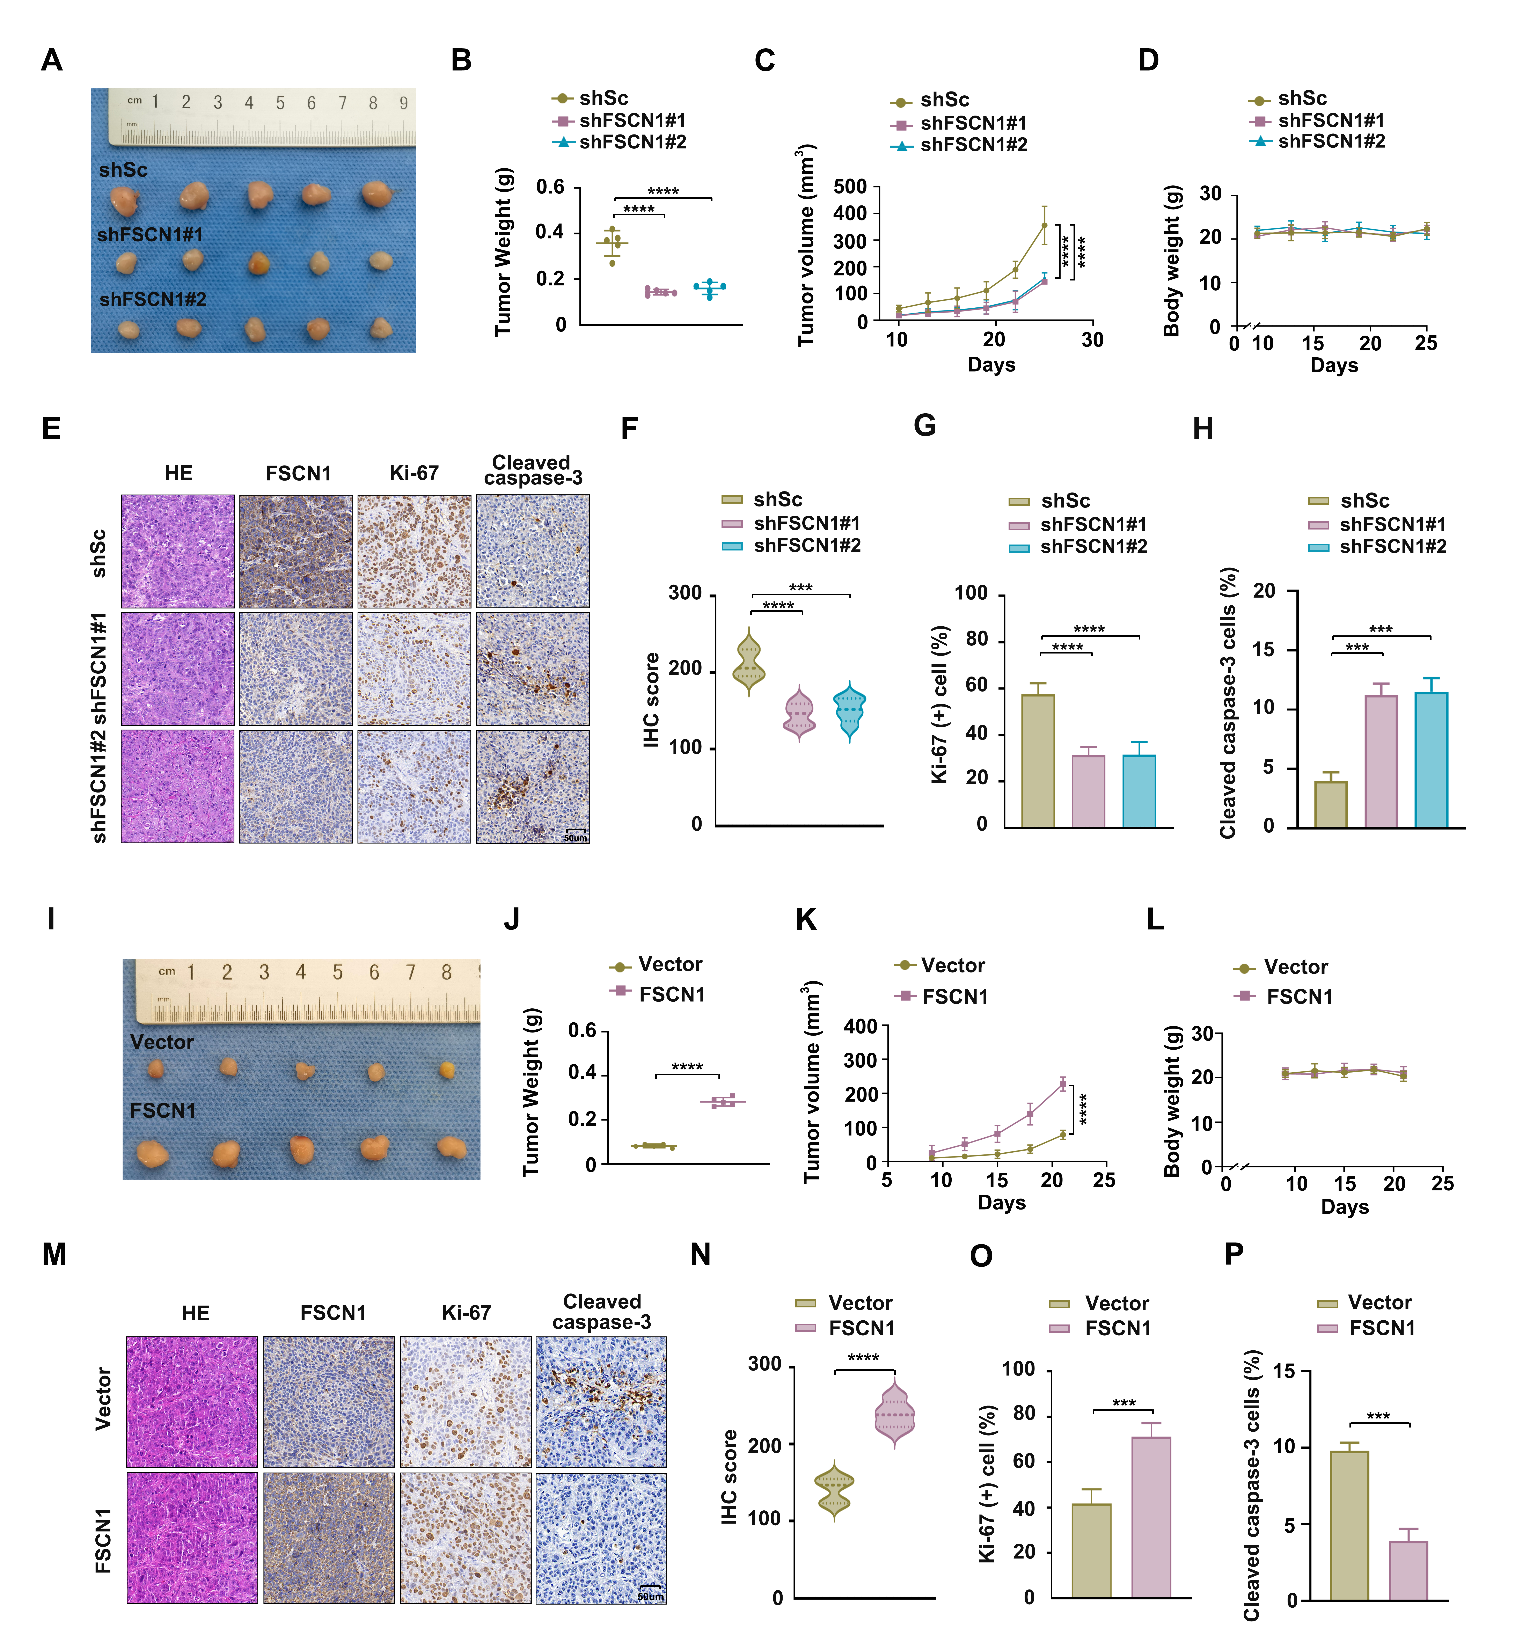
**

**Figure S6.** **FSCN1 exhibits tumor promoter activities *in* *vivo*.**

(**A**-**H**) The indicated TU177 cells were subcutaneously injected into mice for monitoring tumor growth. Tumor images (**A**), tumor weight (**B**), tumor volume(**C**), body weight (**D**), and representative IHC images of La/SSB, Ki-67 and Cleaved caspase-3 (**E**) were shown. Scale bars, 50 µm.The quantitative analysis results for La/SSB, Ki-67 and Cleaved caspase-3 (**F**-**H**). Error bars, mean ± SD (n = 5 mice/group). ***P < 0.001; ****P < 0.0001. (**I-P**) The indicated FaDu cells were subcutaneously injected into mice for monitoring tumor growth. Images of tumors (**I**), tumor weights (**J**), tumor volumes (**K**), body weight (**L**), and representative IHC staining for FSCN1, Ki-67 and Cleaved caspase-3 in xenograft tissues (**M**). Scale bar: 50 μm. The quantitative analysis results for FSCN1, Ki-67 and Cleaved caspase-3 (**N**-**P**). Error bars indicate mean ± SD. ****P < 0.0001.

**SUPPLEMENTARY TABLES**

**Supplementary Table S3.** Clinical features of 60 HNSC patients

| **Characteristics** | **Number of Cases (%)** |
| --- | --- |
| Age |  |
| < 60 | 23(38.3) |
| ≥ 60 | 37(61.7) |
| Gender |  |
| Female | 6(10) |
| Male | 54(90) |
| T Stage |  |
| T1 | 9(15) |
| T2 | 15(25) |
| T3 | 18(30) |
| T4 | 18(30) |
| lymph node metastasis |  |
| N0 | 36(60) |
| N+ | 24(40) |
| Distant metastasis |  |
| M0 | 59(98.3) |
| M1 | 1(1.7) |
| Tumor location |  |
| Hypopharynx | 24(40) |
| Larynx | 36(60) |

**Supplementary Table S4.** Cell lines and growth medium

| **Cell line** | **Source** | **Tissue source** | **Complete growth medium** |
| --- | --- | --- | --- |
| TU177 | Otwo Biotech Inc. (Shenzhen, China). | HNSC | RPMI 1640 (Gibco: Cat#11875093) + 10% FBS (Gibco: Cat#10099141C) + 1% penicillin/streptomycin (Beyotime, Cat# C0222) |
| LIU-LSC-1 | newly established cell line | HNSC | Epithelial Cell Complete Medium (VivaCell: Cat#C3650-0100) + 1% penicillin/streptomycin (Beyotime, Cat# C0222) |
| NOK | Otwo Biotech Inc. (Shenzhen, China). | Normal oral mucosal tissues | RPMI 1640 (Gibco: Cat#11875093) + 10% FBS (Gibco: Cat#10099141C) + 1% penicillin/streptomycin (Beyotime, Cat# C0222) |
| FaDu | ATCC (Manassas, VA, USA) | HNSC | RPMI 1640 (Gibco: Cat#11875093) + 10% FBS (Gibco: Cat#10099141C) + 1% penicillin/streptomycin (Beyotime, Cat# C0222) |
| TU686 | BeNa Culture Collection (Beijing, China) | HNSC | RPMI 1640 (Gibco: Cat#11875093) + 10% FBS (Gibco: Cat#10099141C) + 1% penicillin/streptomycin (Beyotime, Cat# C0222) |
| TU212 | Otwo Biotech Inc. (Shenzhen, China). | HNSC | RPMI 1640 (Gibco: Cat#11875093) + 10% FBS (Gibco: Cat#10099141C) + 1% penicillin/streptomycin (Beyotime, Cat# C0222) |
| HEK293T | ATCC (Manassas, VA, USA) | kidney; Embryo | DMEM (Gibco: Cat#11995065) + 10% FBS (Gibco: Cat#10099141C) + 1% penicillin/streptomycin (Beyotime, Cat# C0222) |

**Supplementary Table S5.** Clinical features of 12 HNSC patients

| **Characteristics** | **Number of Cases (%)** |
| --- | --- |
| Age |  |
| < 60 | 4(33.3) |
| ≥ 60 | 8(66.7) |
| Gender |  |
| Female | 3(25) |
| Male | 9(75) |
| T Stage |  |
| T1 | 3(25) |
| T2 | 1(8.3) |
| T3 | 3(25) |
| T4 | 5(41.7) |
| lymph node metastasis |  |
| N0 | 10(83.3) |
| N+ | 2(16.7) |
| Distant metastasis |  |
| M0 | 11(91.7) |
| M1 | 1(8.3) |
| Tumor location |  |
| Hypopharynx | 5(41.7) |
| Larynx | 7(58.3) |

**Supplementary Table S6.** Clinical characteristics of donor patients

| Clinical characteristics of PDO donor patients | | | | | | |  |
| --- | --- | --- | --- | --- | --- | --- | --- |
| NO. | Age | Gender | T stage | Cancer lymph node metastasis | Distant metastasis | Cancer type | HPV  Status |
| Patient | 59 | Male | T4 | N2 | M0 | laryngocarcinoma | negative |

**Supplementary Table S7.** Antibodies used in this study

| **Antibodies** | **Source** | **Application** |
| --- | --- | --- |
| Mouse monoclonal antibody anti-Ki-67 | Cell Signaling Technology (Cat# 9449) | 1:800 for IHC |
| Mouse monoclonal antibody anti-β-actin | Sigma-Aldrich (Cat #A1978) | 1:1000 for WB |
| Mouse monoclonal antibody anti-SSB | Abcam (Cat# ab75927) | 1:200 for IHC; 1:1000 for WB; 1:200 for IF |
| Mouse monoclonal antibody anti-FSCN1 | Santa Cruz (Cat #Sc- 21743) | 1:50 for IHC; 1:200 for WB |
| Rabbit monoclonal antibody anti-TFAP2C | Abcam (Cat# ab324045) | 1:50 for Chip |
| Rabbit monoclonal antibody anti-TFAP2C | Abcam (Cat# ab218107) | 1:250 for IHC; 1:1000 for WB |
| Goat Anti-Mouse IgG HRP | Abcam (Cat# ab6789) | 1:2000 for WB |
| Goat Anti-Rabbit IgG HRP | Abcam (Cat# ab6721) | 1:2000 for WB |
| Rabbit monoclonal antibody anti-GAPDH | Cell Signaling Technology (Cat #2118) | 1:1000 for WB |
| Rabbit polyclonal antibody anti-p63 | Proteintech (Cat # 12143-1-AP) | 1:200 for IHC |
| Mouse monoclonal antibody anti-Cytokeratin 13 | Proteintech (Cat #66684-1-lg) | 1:1000 for IHC |
| Rabbit polyclonal antibody anti-Cleaved Caspase-3 | Cell Signaling Technology (Cat# 9661) | 1:400 for IHC; 1:400 for IF |

**Supplementary Table S8.** Primer sequences for qRT-PCR used in this study

| **Prime name** | **Primer sequence (5'-3')** |
| --- | --- |
| (human) La/SSB FORWARD | AATTTGCCACGGGACAAGTTT |
| (human) La/SSB REVERSE | TGTTGTTAGACGGTTCAACCTG |
| (human) β-actin FORWARD | CCTGGCACCCAGCACAAT |
| (human) β-actin REVERSE | GGGCCGGACTCGTCATAC |
| (human) FSCN1 FORWARD | CCAGGGTATGGACCTGTCTG |
| (human) FSCN1 REVERSE | GTGTGGGTACGGAAGGCAC |
| (human) TFAP2C FORWARD | TGAAGAGGATTGCGAGGATCG |
| (human) TFAP2C REVERSE | AGATGCGAGTAATGGTCGGC |

**Supplementary Table S9.** Targeting sequences for shRNẠs used in this study

| **Note** | **Sequences (5'-3')** |
| --- | --- |
| shSc | TTCTCCGAACGTGTCACGT |
| shLa/SSB#1 | CCGTCTAACAACAGACTTTAA |
| shLa/SSB#2 | CTGGCCAGAAGTACAAAGAAA |
| shFSCN1#1 | CAAAGACTCCACAGGCAAATA |
| shFSCN1#2 | AGAATGCCAGCTGCTACTTTG |
| shTFAP2C#1 | CCTCAGCTCTACGTCTAAATA |
| shTFAP2C#2 | ATGGAGAAACACAGGAAATAA |

**Supplementary Table S10.** Primers used for ChIP Assays in this study

|  | **Sense (5'-3')** | **Antisense (5'-3')** |
| --- | --- | --- |
| La/SSB binding site  (PCR) | TAACTGGCCGGTACCGTTCTGGGGCTCAAGGCCCT | CTTGATATCCTCGAGGGCCGGGCACTGAGATAACT |
| La/SSB binding site  (qPCR) | AAGCAGGATGGCAAGAAGGTG | GGCCGGGCACTGAGATAACT |
