# Supplementary material for: The RNA-binding protein La/SSB drives head and neck squamous cell carcinoma progression through TFAP2C-mediated transcriptional activation of FSCN1
Source: Research Square preprint supplement (doi:10.21203/rs.3.rs-8395850/v1), 2026-01-21
Supplement: Supplementary file 3 [file e06a460de105f09133b6195a.xlsx]

## Sheet: Sheet1
Supplementary Table S1. Differentially expressed genes of the RNA-seq (shSSB FaDu cells vs. shSc FaDu cells)
gene_name	EntrezID	FPKM.sh_1	FPKM.sh_2	FPKM.sh_3	FPKM.NC_1	FPKM.NC_2	FPKM.NC_3	log2(fc)	pval	regulation
KRT13	3860	464.223	450.028	468.326	88.2311	97.5654	89.74	2.32704	0	up
CALB2	794	6.00763	6.54077	6.34889	51.1817	54.8823	52.8925	-3.07238	0	down
KRT4	3851	138.401	132.873	137.405	12.804	14.2063	12.3601	3.37579	0	up
KRT15	3866	71.1626	67.4778	70.9291	13.2685	14.511	13.5677	2.34157	0	up
NDRG1	10397	11.3953	11.4674	12.0679	45.7599	44.3079	42.7104	-1.92645	0	down
MMP12	4321	77.051	78.6439	76.9347	7.52634	7.87777	7.98292	3.31425	0	up
ALDH1A1	216	41.8847	40.0604	38.3476	0.928699	1.00547	0.791064	5.46403	0	up
PHLDA1	22822	4.55129	4.92444	4.87674	24.8475	22.423	23.3092	-2.29795	0	down
GDF15	9518	11.9531	13.1642	13.057	61.8522	67.6933	61.3064	-2.32178	2e-304	down
SAT1	6303,10861,81539	84.4717	80.9877	78.4511	269.226	289.635	254.02	-1.73669	1.99259e-286	down
MMP10	4319	57.2133	58.2583	57.5363	9.73095	11.1258	11.0143	2.44052	1.5277e-277	up
HMGA1	3159	140.546	145.92	143.429	337.415	355.994	345.53	-1.27306	1.70216e-275	down
TNS3	64759	25.1341	26.0592	25.7038	9.59591	9.26782	9.47019	1.4404	2.49914e-256	up
MAT2A	4144	228.539	229.286	235.722	92.7188	97.7652	89.4337	1.30899	1.60875e-251	up
PSAP	5660,23787,653509,729238	274.739	274.184	284.203	592.451	631.013	592.87	-1.12442	4.44017e-249	down
KRT5	3852	728.132	705.803	747.303	360.634	361.944	363.816	1.0056	5.05683e-243	up
GCNT3	9245	1.37796	1.39839	1.37375	8.55944	8.72996	8.11461	-2.61383	1.60966e-241	down
UPP1	7378	6.70052	6.4535	7.02494	22.5037	23.6778	22.9921	-1.77737	5.83843e-220	down
P4HB	5034	38.3225	38.1877	39.2348	75.0895	75.3213	77.2102	-0.975685	1.5872e-219	down
LYN	4067	9.14903	9.525	9.25856	25.1394	25.2517	25.1751	-1.43579	2.22862e-205	down
FSCN1	6624	34.0608	33.9463	34.1218	74.606	76.9126	76.1975	-1.15684	5.84119e-204	down
ARPIN	348110,100526783	31.2939	31.7167	33.2425	13.529	13.2634	13.4485	1.25817	1.24638e-202	up
BHLHE40	8553	46.907	47.7032	49.146	101.368	102.347	99.851	-1.07839	5.03072e-201	down
SLC16A3	9123	8.44916	8.75134	9.08775	21.5824	22.2866	22.1864	-1.32926	1.13203e-199	down
PDP1	54704,403313	32.5838	32.2247	31.8655	74.2439	69.5272	73.6034	-1.16898	3.09026e-193	down
GPNMB	10457	11.802	10.9298	11.3539	30.3358	31.2962	29.3625	-1.41661	7.41096e-192	down
FAM83A	84985	24.421	25.3846	25.1376	58.6936	56.9504	61.7561	-1.24314	4.19952e-191	down
FAM3C	10447	21.732	19.6119	20.8351	54.3496	57.0496	56.3489	-1.4318	3.70078e-190	down
FOSL1	8061	30.5438	28.672	29.9454	77.4149	79.2757	81.192	-1.41576	4.0395e-187	down
TINAGL1	64129	28.9212	30.5711	31.7403	76.4459	81.7675	73.4814	-1.3446	3.15228e-185	down
VEGFA	7422	9.73108	10.0604	10.8328	23.4823	24.4333	23.7	-1.2256	1.64378e-184	down
PPP4R4	57718	3.22673	3.21486	3.46365	13.9182	13.0461	12.9124	-2.00928	1.09835e-183	down
MIR205HG	642587	46.6784	42.6291	49.6438	111.557	112.819	109.603	-1.26518	1.50451e-173	down
CYP24A1	1591	1.94586	2.06262	2.07304	11.6282	10.639	10.6293	-2.43543	2.51813e-171	down
VAT1	10493,6570	19.1019	20.4812	20.4395	49.2585	51.5746	50.1191	-1.33051	1.18377e-168	down
XAF1	54739	12.8824	13.1856	13.0328	2.01119	2.68181	2.48538	2.44547	8.28121e-167	up
ANGPTL4	51129	0.85007	0.689352	0.807601	10.1225	11.2851	9.44451	-3.71646	7.82688e-165	down
ABLIM1	3983	0.739295	0.843098	0.90259	4.51869	4.43947	4.35721	-2.42179	5.71933e-162	down
KRT16P6	353194	0.572553	0.865521	0.872081	13.6946	15.5907	12.4096	-4.17381	1.41335e-161	down
OGT	8473	28.0237	28.8588	27.8166	55.6902	55.7108	54.2769	-0.967963	2.03023e-161	down
SOX2	6657	23.1112	24.839	24.4674	5.28502	5.83627	5.73313	2.10321	5.84108e-159	up
IFIT1	3434	51.296	49.6404	48.0729	20.4757	20.5669	19.6566	1.29565	5.87722e-159	up
SERPINE1	5054	1.57473	1.83543	2.07497	13.1435	12.5371	11.938	-2.77785	8.42376e-157	down
SAMHD1	25939	13.1348	13.586	13.1947	4.81509	5.11177	5.06514	1.41276	3.83336e-154	up
KLK6	5653	28.3781	30.0317	26.3393	89.5373	103.895	90.3371	-1.74345	5.3443e-152	down
HEG1	57493	0.985138	1.01158	0.952963	4.72117	4.27735	4.61268	-2.20616	8.12762e-149	down
MET	4233,8731	23.8489	24.5494	24.7595	51.3405	48.0356	51.3551	-1.04289	8.70086e-149	down
MALAT1	378938	27.6795	24.8393	29.0753	73.8282	64.6741	72.6198	-1.37154	3.4995e-148	down
CFB	629	39.4209	40.4117	41.9115	18.388	18.4845	17.8241	1.15433	4.47358e-147	up
PIM1	5292,9361	6.98828	6.95874	7.07562	21.8478	22.9239	21.7138	-1.6611	1.50227e-146	down
HK2	3099,29911,3741,3796	5.93884	5.36973	6.07652	18.1404	16.5327	17.699	-1.59095	2.05817e-146	down
ALDH3A1	218	197.754	196.001	209.997	96.4852	103.301	100.298	1.00859	7.55699e-145	up
TRIM22	10346	12.0061	12.2751	12.1895	5.03488	4.94683	5.17921	1.26638	1.1433e-143	up
LOXL2	4017	19.8672	20.7056	20.6641	41.2137	40.6301	41.7127	-1.0127	2.12646e-141	down
HAS3	3038	3.13998	2.7732	3.57571	13.3562	13.4492	12.6003	-2.05409	3.12399e-140	down
BCLAF1	9774	42.6229	41.9932	42.4027	18.5778	16.978	19.2298	1.21317	5.19844e-139	up
JADE2	23338	29.5164	28.5992	30.4304	14.6049	14.4583	15.0232	1.00609	5.62575e-138	up
IFNGR1	3459	89.3977	88.2212	85.7513	40.6174	41.9633	39.4595	1.10974	6.55095e-138	up
CXCL1	2919	60.5687	63.0886	63.9317	20.4645	20.3576	21.7604	1.58375	2.25801e-136	up
WSB1	26118	8.89242	9.10378	9.51693	20.6097	19.7711	19.5552	-1.1233	1.33582e-135	down
AKAP12	9590	11.6684	11.0725	10.9382	23.7728	23.5394	23.6295	-1.07478	1.45844e-133	down
CORO6	84940	2.11536	2.02926	2.25812	10.9479	10.5281	9.23891	-2.26217	3.21377e-133	down
CCND2	894	1.81803	2.32278	2.11057	9.29323	8.47688	8.80686	-2.08793	4.30709e-132	down
SHANK2	22941	2.65772	2.83752	2.82773	8.03893	6.99855	7.8278	-1.45799	7.48595e-132	down
KRT19	3880	549.793	529.274	562.828	292.164	308.172	292.374	0.879097	1.43703e-131	up
IGFL1	374918	73.5162	66.9888	74.7411	17.5796	19.5057	17.4112	1.98175	2.03044e-129	up
LBH	81606,221491	11.0197	10.2017	10.3192	2.29678	2.35699	1.93577	2.25896	9.95392e-128	up
EREG	2069	18.3296	19.505	19.9651	48.5588	43.7827	50.9693	-1.31001	2.96319e-127	down
PHLDB2	90102	4.27576	4.37385	4.16329	9.87415	10.2639	10.3247	-1.24945	3.51222e-127	down
SLC4A7	9497	6.13938	5.75985	5.67776	17.0779	14.7263	16.6862	-1.46401	4.11141e-126	down
PRMT6	55170	16.461	15.2229	16.1717	4.627	5.12233	4.89662	1.70819	5.18485e-126	up
TNFAIP3	7128	42.1597	45.0975	44.7554	21.3166	21.0344	21.1468	1.0559	1.08329e-125	up
IL7R	3575	1.70683	2.21496	2.13283	9.15936	8.98167	9.33579	-2.18211	4.35403e-123	down
DDIT4	54541	122.169	118.742	126.97	233.774	256.329	234.094	-0.977145	1.15702e-122	down
PLIN2	123	3.92341	3.81893	4.06655	12.4178	13.5881	12.0417	-1.68794	1.37341e-122	down
FLNB	2317	15.002	14.8999	15.389	29.78	27.5019	30.928	-0.961719	4.01047e-122	down
LYPLA1	10434	17.2783	18.359	18.5827	38.4693	37.2556	38.838	-1.07924	1.21225e-121	down
TXNRD1	7296	127.397	125.558	129.698	208.908	221.424	210.451	-0.7438	6.41676e-121	down
MMP14	4323	33.851	32.6675	33.8927	61.4683	63.8879	65.7557	-0.928498	5.20916e-119	down
SRSF6	6431	84.2027	80.9148	85.6368	46.4974	46.6623	45.8383	0.851209	1.27129e-117	up
ITGA2	3673	5.48211	4.85283	5.21606	13.8493	12.7862	13.3655	-1.36303	2.89015e-116	down
FHL1	2273,3075,27259	3.11683	3.2209	3.55617	10.0619	10.1877	10.0371	-1.61407	3.12737e-116	down
S100A14	57402,729659	87.9109	86.3791	95.0172	182.966	202.847	192.37	-1.10227	1.84854e-115	down
CLDN4	1364	12.4372	12.576	13.2997	28.5757	30.8341	28.1933	-1.19315	3.19862e-115	down
RUNX2	860	0.398927	0.381982	0.329375	2.83073	2.61982	2.87412	-2.90647	5.999e-115	down
TEF	7008	30.5636	31.149	31.7838	14.5755	14.6984	14.6826	1.08883	1.04672e-114	up
MCM4	4173	22.6931	23.5449	23.8419	40.7038	41.9525	40.5575	-0.814092	4.30449e-114	down
EIF3E	3646	10.6607	10.4419	10.7675	16.9999	17.2051	16.8643	-0.68025	7.0449e-114	down
ETS2	2114	16.9765	16.4493	16.7671	33.1212	35.0831	33.3887	-1.01725	1.25627e-113	down
SLC6A6	6533	2.17499	1.58308	1.8881	8.17881	7.82579	8.9086	-2.14156	4.82937e-113	down
TCEA1	6917	66.2278	65.2365	61.5169	123.061	120.503	127.405	-0.942841	5.16625e-113	down
FHL2	2274	3.29971	3.61333	3.30217	10.504	10.644	9.76341	-1.59742	5.74332e-112	down
TIPARP	25976	12.7465	11.7775	12.3799	26.2792	26.7008	27.4318	-1.12364	1.02948e-111	down
COTL1	23406	17.5495	18.5391	18.6956	36.3625	34.7784	37.1527	-0.983116	2.66849e-111	down
PRSS22	64063	8.27644	8.16699	9.19793	27.3784	28.62	25.1688	-1.66242	4.52871e-111	down
PRSS23	11098	4.03813	4.24617	4.22548	9.65764	10.3765	9.52311	-1.24046	1.1325e-110	down
XPR1	9213	8.18412	8.51116	8.19077	17.9183	17.5201	19.0932	-1.13175	6.01551e-110	down
APP	351	44.5925	43.5567	44.3663	74.4969	75.8582	72.299	-0.748643	8.85562e-109	down
MYO1E	4643	7.30613	7.05984	7.41721	14.5425	14.9365	14.48	-1.01294	4.9896e-108	down
DCTN1	1639	11.4851	11.6275	12.2597	5.25876	5.40674	5.26118	1.15117	3.39321e-107	up
APOBEC3B	9582	24.8002	24.0867	24.3184	58.2893	65.856	58.2571	-1.3171	8.0597e-107	down
CRTAP	10491	10.697	10.3909	10.1828	21.7659	23.8741	22.8404	-1.13088	1.46039e-106	down
TXNIP	10628	84.7231	85.9477	78.5506	165.792	181.621	165.426	-1.04108	1.99508e-105	down
PARP9	83666	37.9463	38.7703	38.5807	21.0632	21.628	20.9791	0.856665	4.1118e-105	up
TGFB1	7040	1.80419	1.62538	1.80826	7.97354	8.69022	8.58151	-2.26897	3.17489e-104	down
STAT6	6778	31.4082	30.5376	32.0007	16.941	16.9662	16.7166	0.892025	7.50302e-104	up
MT-CYB		3786.75	3873.58	3632.42	1760.65	1684.54	1936.25	1.06933	4.29065e-103	up
AREG	374	31.2553	33.2246	30.4675	80.5214	92.0714	78.6962	-1.40415	2.6858e-102	down
RAB31	11031	4.87954	5.61945	5.60351	14.3167	15.2851	14.9571	-1.46843	9.13352e-102	down
DUSP5	1847	13.5723	14.0391	14.7438	34.2403	36.4622	33.0559	-1.29262	4.32394e-100	down
TTPAL	79183	11.9122	12.2234	12.6713	5.21776	5.11494	5.15633	1.24873	1.17736e-99	up
IL20RB	53833	4.2436	4.09398	3.86115	14.8109	15.2929	14.4011	-1.86723	7.13324e-99	down
PYCR1	5831	25.2869	24.6803	27.9392	56.8705	64.1027	57.7974	-1.19829	9.56359e-99	down
LRATD2	157638	24.2649	24.5585	24.8196	43.8687	42.2534	44.554	-0.827375	3.34062e-98	down
IL4R	3566	8.7962	8.39999	9.64424	19.5776	20.4698	19.6515	-1.1533	1.9412e-96	down
ERO1A	30001	13.6149	13.7616	13.3752	28.1178	26.4516	25.5013	-0.974412	3.0953e-95	down
SPIRE1	56907	3.62345	3.62729	3.9547	10.1012	9.36511	9.61877	-1.37608	3.83672e-94	down
DSC3	1825,1824	26.4576	26.7454	27.1794	13.2797	11.9346	13.1943	1.06545	5.32859e-94	up
IL1RN	3557	11.8677	12.6132	11.2357	3.34245	3.43341	3.05189	1.86166	8.94628e-92	up
ENSG00000275216		16.2593	15.3068	15.3542	34.6605	31.576	36.2473	-1.12711	4.11998e-91	down
P4HA1	5033	17.5606	16.6325	15.5679	38.0012	37.1353	36.6863	-1.16813	5.40031e-91	down
CAB39	51719	20.3994	21.4003	21.8545	37.815	37.6685	37.9825	-0.833934	5.16147e-90	down
LCN2	3934	65.6841	63.7436	63.3738	118.23	120.391	113.966	-0.870864	8.79296e-90	down
TRA2A	29896	48.0556	46.7997	49.4848	23.9593	21.9407	23.9971	1.04617	9.22377e-90	up
LIMA1	51474	22.3014	23.0244	21.1577	41.4253	41.859	41.0443	-0.903089	1.31829e-89	down
EHBP1L1	254102	22.5165	20.1208	24.5493	47.2662	45.1965	47.9556	-1.06348	6.89345e-89	down
PLAT	5327	4.58719	4.34841	4.61851	10.5021	11.1212	10.009	-1.22266	7.95463e-89	down
ASS1	445	50.4208	48.2303	50.6348	90.8585	102.492	93.0222	-0.939815	3.3114e-88	down
SAMD9L	219285	15.7286	15.2322	14.7814	7.17971	6.6643	6.94662	1.13759	4.89485e-88	up
NSD1	64324	14.6702	14.6491	15.3453	8.43094	7.93242	8.45142	0.847933	5.1528e-88	up
FUS	2521	126.19	108.963	135.757	55.0925	49.9636	56.0964	1.20264	1.0947e-87	up
TMEM123	114908,10360	105.642	106.655	108.04	167.694	161.993	170.623	-0.64323	2.54865e-87	down
MXD1	4084	1.59586	2.10896	1.81791	7.74484	6.90539	7.26454	-1.98845	4.3078e-87	down
PABPC1	26986	143.871	148.212	142.124	274.793	253.972	298.431	-0.929844	7.32546e-87	down
KCNC4	3749	0.151006	0.123219	0.156854	0.826526	0.777141	0.795477	-2.4765	9.73853e-87	down
DUSP6	1848	2.45866	3.11184	3.23073	11.42	11.6299	10.8254	-1.94446	2.27754e-86	down
LTBP3	4054,4053	8.94133	7.86001	9.07878	17.0795	16.8612	17.2458	-0.983919	4.79955e-86	down
CRYBG2	55057	0.914821	1.01939	1.25682	5.05563	4.58739	5.00493	-2.1986	5.16821e-86	down
CD55	1604	4.37542	4.84847	4.62556	10.7766	11.3245	10.0271	-1.21401	9.17759e-85	down
CEACAM6	4680	1.21835	1.06949	1.15886	6.00823	6.69354	6.76097	-2.49743	2.61287e-84	down
APCDD1	147495	2.54672	2.73057	2.32524	0.278867	0.294335	0.232747	3.23772	4.42874e-84	up
UCA1	652995	6.97999	6.92621	6.64205	17.0146	15.6658	16.559	-1.2608	7.31452e-84	down
CAV1	857	377.997	380.172	376.935	241.252	245.679	243.623	0.635762	1.05181e-83	up
S100P	6286	2.18787	3.81272	2.38537	36.41	44.7874	32.4201	-3.76006	1.27778e-83	down
IGF2BP2	10644	2.72252	3.07682	2.84706	8.67583	8.98441	10.0512	-1.68031	1.38307e-83	down
IER5	51278	8.29817	8.27255	8.20524	19.2359	18.8206	17.5493	-1.16629	5.50873e-83	down
MRPS11	64963	19.8277	18.373	20.767	9.11053	9.10779	8.78616	1.12673	8.67597e-83	up
HSPB1	3315	154.952	147.744	159.078	255.145	281.419	277.109	-0.817262	1.26674e-82	down
CAPG	822,64151	13.0149	13.0838	12.7518	28.3419	29.2847	28.7072	-1.15199	2.26872e-82	down
GRB7	2886	13.6978	14.9144	13.8165	30.5303	34.481	31.736	-1.18918	4.96577e-82	down
TOMM20	9804	49.3191	47.4926	48.5053	79.7711	78.6126	82.2162	-0.727432	7.97844e-82	down
ATP1B1	481	9.56314	9.66306	9.62517	16.2797	16.1691	15.9726	-0.747006	1.86266e-81	down
PANX2	56666	5.99872	6.34224	6.21833	15.7854	16.4277	15.6003	-1.36527	4.99952e-81	down
HOXB9	3219	0.889635	0.867754	0.737543	5.61387	6.16791	6.60803	-2.88183	5.97441e-81	down
MAL2	114569	93.8602	100.671	91.4631	166.984	167.522	174.14	-0.830678	6.61502e-81	down
CXCL3	2921	11.3399	9.63279	11.6582	2.29592	1.99199	2.07491	2.3585	1.28451e-80	up
ADAM8	101	3.74702	3.80529	3.4552	9.83668	10.671	10.4258	-1.49068	2.49938e-80	down
ANXA8	653145,728113	66.0188	66.3997	66.6225	35.5037	38.1793	34.3823	0.881164	4.38231e-80	up
TNFRSF21	27242	17.1625	17.1112	16.5754	35.6402	35.4419	40.5261	-1.13415	9.87661e-80	down
RPSA	3921	191.099	180.744	199.831	306.94	333.555	306.419	-0.728043	1.24075e-79	down
NAP1L1	4673	25.2067	25.5755	25.4932	37.7852	37.9722	37.7343	-0.573297	1.8035e-79	down
EML2	24139	3.46652	3.5161	3.88134	8.23581	8.43977	8.24567	-1.19783	2.00231e-79	down
NAMPT	10135	6.74106	6.76263	6.87551	11.7205	11.0007	11.1231	-0.731816	2.43355e-79	down
FZD6	8323	91.1763	91.5825	93.8619	57.6718	56.5291	56.8159	0.69377	2.98663e-79	up
GPX2	2877	68.274	70.8131	74.6435	28.0201	31.8526	28.092	1.2808	4.08601e-79	up
FNDC3A	22862	12.5757	12.6704	12.7566	22.4085	21.8601	23.3916	-0.832206	7.72566e-79	down
DHCR24	1718	90.1844	91.9797	89.5962	55.7368	53.4274	55.1366	0.725995	1.44509e-78	up
HNRNPH3	3189	46.4498	47.1712	47.4198	71.6443	72.4195	72.3635	-0.61777	2.05184e-78	down
NPTXR	23467	3.41934	3.20776	3.26477	8.35596	8.13371	8.54932	-1.33986	7.10109e-78	down
WARS1	7453	41.045	42.3256	44.0098	66.6329	68.9584	66.6347	-0.666825	9.65717e-78	down
PER3	8863	8.33252	8.48139	8.6703	3.7677	3.77331	3.60893	1.19257	9.95937e-78	up
APOL3	80833,23780	11.2536	9.67444	11.3031	3.86592	3.5731	3.93982	1.5021	1.296e-77	up
MYADM	91663	7.31462	8.08585	7.55823	17.5182	17.3257	17.1094	-1.17817	1.43154e-77	down
APOL1	8542	25.3999	24.5007	24.4087	10.5721	10.8286	11.4789	1.17635	1.92473e-77	up
SEZ6L2	26470	2.9005	3.46781	3.17147	9.92566	9.71225	10.2772	-1.64885	2.71518e-77	down
TICRR	90381	18.9558	18.5671	20.1563	10.1962	9.25266	9.62589	0.988287	6.5025e-77	up
GDI1	2664	24.8275	25.3161	25.513	41.6427	42.0368	43.9571	-0.754503	2.11815e-76	down
MT-RNR1		591.878	584.242	576.94	904.817	889.785	947.987	-0.645663	5.61706e-76	down
SLC5A3	6526	13.5455	11.8605	12.4829	29.8853	24.63	28.6842	-1.1348	8.96423e-76	down
YBX3	8531	35.715	35.5687	37.0848	54.378	56.3344	57.3427	-0.632988	2.62867e-75	down
B3GNT5	84002	8.40787	7.57137	8.7075	16.4548	15.7786	16.4083	-0.978456	4.78739e-75	down
C3	718	20.9583	20.6004	20.3599	11.4933	10.8349	11.6964	0.863794	8.58175e-75	up
COL7A1	1294	5.77265	5.95006	6.12797	13.1256	11.4111	11.9452	-1.0312	1.77363e-74	down
POLR3H	171568	13.472	13.7814	15.0349	6.39545	6.62948	6.29551	1.13013	1.87079e-74	up
TGM2	7052	5.57068	6.22438	5.72715	13.0391	12.7725	12.1161	-1.11407	1.9102e-74	down
PLXNA1	5361	23.0748	22.5172	24.0615	13.8594	13.6896	13.9257	0.747963	5.26097e-74	up
BLM	641	17.3824	18.0237	17.6143	9.37303	8.86324	8.53255	0.985994	4.18727e-73	up
PCNX3	399909	36.7161	36.9478	38.221	23.1096	22.6991	22.945	0.702509	9.55335e-73	up
CMIP	80790	5.72088	6.36225	5.80948	12.1042	11.4035	12.2309	-0.998118	1.46218e-72	down
RPL3	6122	200.611	197.08	208.116	327.095	361.616	319.198	-0.734434	4.11947e-72	down
ATF3	467	2.35515	2.28774	1.87755	8.69319	8.18254	7.75196	-1.91724	1.14694e-71	down
ITGB2	3689	0.561974	0.669381	0.625084	2.83592	2.85605	3.45193	-2.30027	2.33173e-71	down
SREBF1	6720	44.1751	46.2163	46.0508	26.1553	26.3348	27.6499	0.767696	2.44953e-71	up
LTBP4	8425	2.01915	2.12379	2.19593	5.41334	5.46277	5.22979	-1.34529	2.82993e-71	down
CD44	960	14.2807	13.7878	14.4796	23.7856	22.6966	24.4416	-0.737174	4.34665e-71	down
PPP1R14C	81706	1.55516	1.26512	1.42054	7.21678	7.61028	8.12952	-2.43649	4.79652e-71	down
HYOU1	10525	32.4744	31.3309	33.1601	52.7769	53.0862	57.9852	-0.756821	9.83132e-71	down
SUPT6H	6830	24.1688	23.5194	23.5556	14.0935	13.7132	14.2408	0.760745	1.41679e-70	up
SSB	6741	14.5832	14.3852	14.4358	25.2264	25.5261	24.8119	-0.799868	1.89204e-70	down
HERPUD1	9709	10.1035	9.66841	9.61767	19.1254	21.213	19.5911	-1.02796	2.14259e-70	down
MT-TN		1719.05	1747.68	1700.79	2945.68	2902.98	3150.35	-0.800293	6.25625e-70	down
NBEAL2	23218	2.70994	2.73728	2.8328	6.07736	5.90858	5.55068	-1.08266	8.64745e-70	down
EIF1AX	1964	20.1448	21.0027	21.8475	40.7478	36.6089	39.1736	-0.887394	9.72377e-70	down
OSMR	9180	10.9776	11.2906	11.0143	23.5391	20.2923	21.7504	-0.97853	1.35692e-69	down
SNHG29	125144	29.8125	30.1084	31.6196	46.5947	49.6037	47.3663	-0.649218	1.52847e-69	down
KRT8	3856	315.399	306.637	314.84	181.202	198.474	177.619	0.749417	1.69877e-69	up
GPRC5A	9052	42.5523	45.5665	43.8742	73.9887	68.8916	72.7302	-0.707966	2.50714e-69	down
CMTM6	54918	20.377	20.9314	21.7627	36.3942	37.1132	38.738	-0.831607	3.51152e-69	down
TPBG	7162	18.327	18.654	19.9973	37.8064	39.3128	34.8131	-0.974143	4.08977e-69	down
LAPTM4B	55353	55.827	53.8409	53.5335	86.1395	87.7975	85.196	-0.667039	6.08955e-69	down
COBLL1	22837	6.12063	5.48873	5.33009	2.43207	2.40091	2.53122	1.20179	3.85661e-68	up
FBXO32	114907	1.52934	1.64897	1.76575	5.09515	4.77351	4.61699	-1.55086	5.9331e-68	down
CCN1	3491,890,5530	25.3401	25.3016	25.4024	42.1065	41.4323	42.6055	-0.730167	8.42699e-68	down
EIF3H	8667	49.1547	48.9663	48.0681	76.684	84.2055	77.6076	-0.706137	2.91921e-67	down
DZIP3	9666	16.6277	15.7771	16.0378	8.14787	7.29113	7.06014	1.10641	3.64156e-67	up
ITPR3	3710	12.9924	13.2024	13.5051	22.7632	21.0848	22.6211	-0.743549	3.77584e-67	down
UBE2H	7328	24.2414	24.3143	24.5416	40.7577	38.9062	42.9626	-0.746379	7.30508e-67	down
CTSL	1514	15.3301	14.8665	15.542	27.7645	31.169	27.2538	-0.914063	1.13959e-66	down
L3MBTL2	83746	11.0717	10.5868	11.1489	4.79143	4.91445	5.18703	1.13939	1.4195e-66	up
TGFBI	7045	3.16199	2.9054	2.8311	7.05957	8.06268	7.30464	-1.3336	1.53084e-66	down
FLOT1	10211	30.3663	31.5575	30.7403	52.9874	52.9229	50.7577	-0.757628	2.59674e-66	down
ACTN1	87	35.2516	34.4117	33.3319	51.6035	51.9218	53.0823	-0.604576	5.16866e-66	down
ERRFI1	54206	6.79959	6.9298	7.41637	15.7634	14.8976	14.7194	-1.1017	5.30468e-66	down
SPOP	8405	17.0413	16.5539	18.5942	8.94102	8.61266	8.81505	0.984928	6.50497e-66	up
STT3B	201595	31.1562	30.3443	30.1409	49.6427	47.5802	48.2395	-0.666574	1.50063e-65	down
P2RY2	5029	3.80347	3.94367	4.10591	8.53317	7.85334	8.07239	-1.0451	1.65826e-65	down
PLAU	5328	55.7015	58.6121	59.5118	90.6551	94.8938	94.4016	-0.687533	2.58045e-65	down
PTPN13	5783	12.4037	12.4776	12.3289	6.79475	6.75006	6.77889	0.872534	3.14175e-65	up
ABCA2	20	2.40028	2.16754	2.32864	5.4155	5.00872	5.01832	-1.16298	6.48043e-65	down
TPM4	7171	22.7354	23.4195	23.2606	35.0633	35.5346	33.9238	-0.590473	8.15396e-65	down
INTS14	81556	28.1558	28.5624	28.54	15.3376	15.6605	15.7382	0.867295	1.209e-64	up
ALDH1A3	220	177.363	180.645	189.259	264.691	261.146	274.527	-0.548408	1.56636e-64	down
AMIGO2	347902	1.0293	1.31397	1.05143	5.00042	5.60501	5.13725	-2.21332	3.3234e-64	down
SINHCAF	58516	23.5848	24.8956	23.3196	41.0107	39.4833	41.9334	-0.76987	7.53975e-64	down
MAFG	4097	10.6994	10.4763	12.1763	22.6671	22.9018	21.0852	-0.998924	9.85695e-64	down
ARF4	378	38.4898	39.45	38.5669	63.0738	64.0618	63.348	-0.709253	1.41887e-63	down
EIF2S3	1968	60.3386	59.9742	62.512	97.2483	93.0289	102.634	-0.680004	1.98298e-63	down
PLP2	5355	67.9338	69.5177	72.0026	125.208	135.886	119.974	-0.86341	2.11887e-63	down
THSD4	79875	0.801025	0.768038	0.831485	2.52386	2.22816	2.88647	-1.66992	2.50604e-63	down
OGFR	11054	22.8725	22.491	22.7199	12.0494	12.5021	12.148	0.891542	3.7311e-63	up
CKAP2	26586	52.0721	53.3069	51.6593	31.2673	31.2503	31.7928	0.735627	4.88933e-63	up
NCOA5	57727	18.8186	20.633	20.4998	8.54796	8.18198	8.93584	1.22395	6.22073e-63	up
SEMA3B	7869	1.43425	1.75933	1.63097	5.68302	5.5873	4.96902	-1.75103	1.50604e-62	down
GADD45A	1647	13.3363	12.9886	14.1767	30.79	37.0034	31.7876	-1.29789	1.76584e-62	down
NPDC1	56654	8.06656	9.42122	9.8127	22.1813	26.4494	23.8508	-1.40869	4.74262e-62	down
ADA	100	0.799484	0.86436	0.804914	2.35068	2.54789	2.40521	-1.56486	6.10054e-62	down
DAGLA	747	5.55284	5.60422	5.73109	2.02431	2.06251	1.97397	1.47843	6.43024e-62	up
SERINC2	347735	24.4555	28.004	24.5364	48.6422	50.4923	50.2664	-0.956336	1.37377e-61	down
MYL6	4637	124.887	120.583	137.591	65.9446	74.1689	65.2309	0.899528	1.6261e-61	up
CHPF	79586	7.03612	6.94291	7.24122	14.7711	14.8747	14.402	-1.05363	1.92473e-61	down
FGFR3	2261	29.0701	31.9011	32.0649	15.8777	16.7479	15.4338	0.95297	2.00182e-61	up
FAM107B	83641	2.16233	2.25024	2.6138	6.14354	6.05067	6.03251	-1.3752	2.36335e-61	down
JUNB	3726,10535	72.8408	72.3505	71.6964	114.529	123.104	115.934	-0.705038	2.83829e-61	down
HLA-A	3105	117.681	109.792	117.487	169.818	179.477	174.907	-0.603692	3.44986e-61	down
SLCO4A1	28231	1.51158	1.59876	1.64765	5.33409	5.97514	5.43209	-1.81499	4.89835e-61	down
EWSR1	2130	54.3294	51.8217	55.7588	34.8019	35.0643	35.6826	0.617281	5.69264e-61	up
RNASEH2C	84153	18.7041	18.7643	19.6237	9.32123	8.96393	7.89816	1.12464	5.724e-61	up
TMEM184B	25829	36.1388	35.3139	36.4205	22.3945	21.4427	22.5766	0.699782	5.93915e-61	up
MAZ	4150	59.1814	59.1789	64.3384	34.8562	36.3758	35.3478	0.777533	6.20749e-61	up
ADAR	103	59.9986	60.9284	63.2966	39.5211	40.406	41.2153	0.604753	8.94905e-61	up
TIMP2	7077	1.73836	1.99539	1.70311	5.56054	5.44423	6.0394	-1.64843	1.14322e-60	down
RPL7	6129	214.951	193.263	222.497	348.346	376.677	337.55	-0.75251	1.28979e-60	down
ATP6V1H	51606	8.07682	8.59552	9.10737	16.6707	16.6052	16.3947	-0.946155	1.40838e-60	down
HDAC9	9734	0.371361	0.454553	0.419999	1.48682	1.54434	1.38184	-1.82456	1.4711e-60	down
KRCC1	51315	19.2255	20.4021	19.7371	7.11418	7.41405	6.22479	1.51628	1.57015e-60	up
LIF	3976	6.52211	7.41195	7.78137	16.9709	16.6332	15.9456	-1.19015	2.1153e-60	down
STAG1	10274,56937	7.61957	7.6538	7.86699	3.72715	3.62491	3.60584	1.07844	2.3652e-60	up
ITPRIP	85450	5.38623	5.85323	6.45041	12.1033	12.2926	12.0399	-1.04243	2.77424e-60	down
SLC25A37	51312	7.09891	6.37097	7.23193	13.4319	12.8352	12.7387	-0.913933	3.44215e-60	down
KIF18B	146909	13.3266	14.186	14.3271	6.38401	6.36682	6.6539	1.10846	3.50699e-60	up
FTH1	2495	3572.38	3408.55	3574.21	5626.25	5356.73	6211.98	-0.704041	3.85328e-60	down
ST6GALNAC1	55808	6.76742	6.91412	6.58762	1.36203	1.79523	1.63616	2.08016	3.94804e-60	up
GLUL	2752	26.7472	27.9688	26.8345	16.484	16.9068	16.8098	0.699991	4.25908e-60	up
FKBP4	2288	29.4753	29.1635	31.9914	47.6651	50.5622	48.3144	-0.693247	4.56823e-60	down
SLC2A1	6513	40.5976	41.3783	40.8097	60.3328	59.1614	60.3006	-0.550209	5.06306e-60	down
ETS1	2113	7.7019	6.73648	7.51255	14.01	13.785	14.5148	-0.946711	5.20047e-60	down
AHNAK2	113146	1.79796	1.60564	1.85174	4.20615	3.62221	4.01205	-1.17186	1.24982e-59	down
RPL4	6124	208.359	214.178	209.991	334.982	368.988	320.995	-0.696374	1.3221e-59	down
ETV4	2118	2.29092	2.08175	2.16585	6.9485	6.74824	6.71687	-1.64249	1.45906e-59	down
SULF2	55959	15.9045	16.166	15.8367	7.85378	8.50702	7.43784	1.00936	1.87854e-59	up
CCND1	595	132.078	130.523	136.955	203.578	194.276	215.843	-0.619131	2.43042e-59	down
ALOX5	240	0.114292	0.104877	0.0816105	1.81072	1.75174	1.91518	-4.18678	5.47041e-59	down
FAM13B	51306	10.1973	9.72654	10.0534	4.68849	4.78512	4.97914	1.05252	8.53571e-59	up
CMBL	134147	4.65912	4.89204	4.87042	10.2413	10.2801	10.1397	-1.08818	1.13382e-58	down
NEB	4703	0.794771	0.621649	0.645945	0.152256	0.123545	0.101962	2.44874	3.28098e-58	up
SMAD3	4088	24.2903	23.6867	25.4442	37.9203	35.7187	36.6884	-0.587522	4.37737e-58	down
ZNF185	7739	1.77208	1.6988	1.74744	5.15527	5.00745	5.01448	-1.54025	4.86251e-58	down
ARNTL2	56938	6.47285	6.50998	6.63022	13.1773	11.7308	12.6641	-0.937854	1.27975e-57	down
SRSF3	6428	61.9849	61.2168	63.3054	41.1956	42.1345	40.3517	0.592597	1.65396e-57	up
SRSF2	6427	136.663	142.247	149.264	87.3629	90.9518	85.2341	0.700125	1.86326e-57	up
KITLG	4254	16.6546	16.8481	16.7014	9.26981	8.75997	9.17678	0.883852	1.86451e-57	up
ANXA8L1	728113	78.4952	76.0153	78.7578	42.2145	45.5887	39.2408	0.876663	2.26134e-57	up
ETV5	2119	0.894224	0.87966	0.846877	3.42095	3.24835	4.11063	-2.04029	4.62833e-57	down
PAF1	54623,5828	37.5949	37.6296	38.7996	19.8695	19.9153	21.3956	0.898197	5.42809e-57	up
IFI16	3428	33.3018	33.4223	31.8871	50.4223	52.5911	51.5819	-0.648674	7.32481e-57	down
HERC6	55008	16.2054	15.7069	16.3525	8.26232	8.26772	8.82115	0.928917	7.36671e-57	up
ARL8B	55207	23.0453	22.6793	23.2613	40.1832	37.8924	37.1633	-0.740255	8.04463e-57	down
CHD3	1107	35.4676	33.7431	37.0734	22.6033	21.2547	22.1246	0.687766	8.5049e-57	up
SEPTIN2	4735	76.9107	77.5776	76.5654	49.8729	51.4866	51.5286	0.595752	2.00455e-56	up
IDS	3423	3.58634	3.71558	3.99038	7.22724	7.43055	7.62148	-0.980363	2.31452e-56	down
CLDN7	1366	45.0842	44.0863	43.9211	71.6477	74.7765	69.3347	-0.697001	2.59965e-56	down
CMTM4	146223	10.2911	9.88854	10.3595	17.3216	16.2372	17.3113	-0.736163	3.74098e-56	down
EGR1	1958	37.6047	38.9718	39.6927	59.7865	60.9988	62.556	-0.657063	4.35361e-56	down
SEMA3A	10371	8.6857	8.01381	8.02094	4.09804	3.69949	3.70489	1.10377	1.07266e-55	up
ARRDC3	57561	2.74746	2.78361	2.90896	7.05297	6.61913	7.14565	-1.30249	1.11572e-55	down
ERGIC1	57222	6.89311	6.99464	6.83473	10.7545	11.4461	11.0041	-0.680191	1.75656e-55	down
SMIM19	114926	18.7525	19.6349	19.6055	10.0102	9.65887	10.0794	0.963064	1.80007e-55	up
AMOTL1	154810	4.13911	3.71648	3.78176	7.58436	7.50702	7.43548	-0.952884	4.29913e-55	down
MPRIP	23164	11.3355	10.8941	11.9334	17.8773	16.8788	18.0389	-0.627969	6.08717e-55	down
TC2N	123036	11.7605	11.2162	11.8806	21.2795	19.1617	20.7414	-0.811658	6.89866e-55	down
GFPT1	2673	8.17668	9.17319	9.04355	16.3379	15.2306	15.8808	-0.846209	7.45596e-55	down
SLC1A5	6510	39.3702	39.0808	38.8658	60.3891	61.4292	58.5813	-0.620787	7.8595e-55	down
ARHGAP23	57636	25.6432	26.4653	26.9314	16.4702	16.6327	16.237	0.679826	7.91716e-55	up
MYOF	26509	81.0087	82.9915	84.8432	115.495	113.056	117.149	-0.474284	8.70736e-55	down
PTGR2	145482	5.95462	5.92591	6.62553	11.3992	11.6918	12.0829	-0.926507	1.05018e-54	down
KIF20A	10112	33.0383	32.874	34.2094	18.8715	19.8413	18.5292	0.806608	1.33585e-54	up
RASSF6	166824	3.86122	4.10177	4.27773	1.41026	1.28601	1.21102	1.64745	1.45183e-54	up
NCOA6	23054	10.7738	11.0598	11.5369	6.33471	5.97707	6.34288	0.839035	1.64997e-54	up
MAP2K1	5604	8.68235	8.6784	9.24557	15.3946	16.6634	15.4258	-0.835669	1.92354e-54	down
PPFIBP1	8496	5.79104	5.7741	6.15903	10.8369	10.0732	11.5379	-0.872409	2.74428e-54	down
MAP4K4	9448	5.11442	5.04273	5.25375	8.58706	8.58232	8.44755	-0.733147	2.85422e-54	down
GBP1	2633	27.1835	27.2517	26.8488	16.0215	14.9561	16.1028	0.787844	3.58166e-54	up
NUS1	116150,11049	11.9365	11.8747	12.4475	22.8391	20.5337	22.9077	-0.870261	4.7523e-54	down
DET1	55070	4.42041	4.1571	4.38658	0.921113	1.32625	0.950816	2.0192	1.04056e-53	up
NCR3LG1	374383	1.7515	1.67491	1.68531	5.38338	4.38569	5.16785	-1.547	1.87537e-53	down
MT-RNR2		2505.89	2472.17	2361.75	6283.87	5562.99	6765.04	-1.34241	1.87585e-53	down
PRMT2	3275	32.418	30.4617	31.8916	19.7636	19.5915	18.4209	0.713981	2.17981e-53	up
TRIM21	6737	23.7465	22.185	25.4397	9.92956	9.92379	10.3733	1.23952	2.24458e-53	up
IVD	3712	14.3844	14.5147	15.2043	8.27288	8.34793	8.01492	0.840135	2.53643e-53	up
KRT80	144501	31.0481	32.2592	34.4197	50.7151	54.608	54.2986	-0.707828	2.95585e-53	down
LINC00342	150759	0.119492	0.0742381	0.0955901	1.06437	0.892327	1.24829	-3.46958	3.56483e-53	down
YWHAZ	7534	191.991	194.229	190.586	259.871	260.434	265.491	-0.446068	3.76817e-53	down
LY6K	54742	0.866428	0.677926	1.04464	4.37248	4.51693	3.97984	-2.31347	5.00438e-53	down
CCDC92	80212	3.47351	3.46478	3.26051	1.06942	1.07112	1.20854	1.60656	5.89577e-53	up
DNAJB1	3337	19.6964	19.295	19.49	29.9847	29.3188	28.3332	-0.583556	6.35431e-53	down
HNRNPA1	3178	172.072	166.054	175.249	120.888	121.404	121.058	0.498655	1.15855e-52	up
OSBPL3	26031	3.02056	3.10468	3.12101	6.7052	6.11697	6.87882	-1.09133	1.37898e-52	down
GRINA	2907	18.9139	18.6241	20.4384	33.7291	35.8608	36.3119	-0.869188	1.46985e-52	down
MKI67	4288	47.201	45.7015	44.9082	24.5557	20.4705	25.4917	0.966626	2.04521e-52	up
GSR	2936	16.3828	18.1793	16.7523	31.1284	34.1575	31.2718	-0.91203	2.12212e-52	down
FXYD3	5349	51.7032	56.4361	55.5071	28.6379	31.5745	28.0893	0.890068	2.16614e-52	up
HBEGF	1839	5.38362	6.05726	5.47192	13.6523	13.9585	12.9572	-1.26222	2.97994e-52	down
FXYD5	53827	4.5991	5.34153	4.66906	13.1998	11.9088	12.8871	-1.37891	3.64688e-52	down
ACAD9	28976	7.08672	7.03821	7.32501	3.35991	3.83153	3.51253	1.00283	4.07048e-52	up
SEMA4B	10509	101.675	103.646	103.833	70.5367	71.6443	71.7944	0.530881	6.26249e-52	up
IKBKB	3551	15.3842	14.8652	15.2263	9.50076	9.16769	9.38602	0.696867	7.64032e-52	up
FOXM1	2305	54.5219	53.639	52.5277	29.2359	27.6712	32.1201	0.851948	8.19587e-52	up
VDAC2	7417	51.7249	53.1665	51.3433	79.4504	78.0073	80.7731	-0.608643	1.29775e-51	down
CDH3	1001,1013	64.8934	65.1161	65.8032	89.9856	92.3656	95.3247	-0.503927	1.30738e-51	down
CDH1	999,51343	47.5383	47.9898	48.3256	75.0095	68.4083	74.4711	-0.59899	1.48725e-51	down
CHD6	84181	11.8404	11.8776	12.3602	7.60856	7.4653	7.44363	0.680078	2.16029e-51	up
DHRS9	10170	0.677603	0.564667	0.664668	2.99657	3.41954	3.56398	-2.3878	2.33824e-51	down
CEACAM5	1048	0.175221	0.197929	0.136797	2.00394	1.72697	1.83468	-3.44812	2.41263e-51	down
TMTC3	160418	15.3544	14.0934	14.8126	7.08777	5.67608	6.90986	1.16975	2.93224e-51	up
RAB29	8934	6.01705	5.7611	5.30562	12.9217	12.1262	13.1547	-1.16105	3.45383e-51	down
LPCAT1	79888	9.98796	9.67742	10.0992	17.7468	16.1784	16.8596	-0.770798	4.44302e-51	down
TUBB4B	10383	292.106	289.441	284.981	171.668	190.401	173.333	0.694624	7.48852e-51	up
H2AW	92815	10.8426	11.9543	13.1582	28.273	34.5853	28.9463	-1.35237	9.06135e-51	down
MX1	4599	9.82975	9.42253	9.56289	6.0225	5.97781	5.86239	0.689878	9.69857e-51	up
ZMPSTE24	10269	30.6829	32.085	30.3841	17.7693	17.8611	17.6339	0.806419	1.02783e-50	up
VANGL1	81839	10.1114	10.1625	9.5129	4.97842	4.91535	5.31068	0.970177	1.05703e-50	up
CAPRIN2	65981	3.06089	2.66759	2.92216	6.09885	5.78558	6.02067	-1.04949	1.23238e-50	down
ATAD1	84896	13.9863	13.8308	13.3736	24.0525	22.4441	22.4163	-0.742453	1.33224e-50	down
EPPK1	83481	4.57202	4.59461	4.92219	7.71391	7.6945	8.23528	-0.746904	1.55312e-50	down
ANKFY1	51479	10.2441	10.5346	11.0263	6.32286	5.82102	6.19611	0.794261	1.75389e-50	up
LAMC2	3918	26.674	26.8692	27.2426	38.3934	39.0785	38.3028	-0.519147	3.95276e-50	down
TUBA4A	7277	6.37917	5.99676	6.45103	12.9818	14.7047	13.1031	-1.1154	5.02797e-50	down
ALG6	29929	11.8452	11.5407	10.7988	5.52633	5.41565	5.43759	1.06145	5.44787e-50	up
GALNT3	2591	7.44376	8.24366	8.32198	15.16	15.1746	15.4462	-0.931143	5.95183e-50	down
CPVL	54504	17.747	17.3991	15.7491	7.76364	7.54738	7.42548	1.16252	6.89653e-50	up
GNL3	26354	23.4686	23.3927	24.2259	37.3672	37.4506	36.9204	-0.652463	8.09691e-50	down
BDKRB2	624	3.49047	3.38296	3.64265	7.11976	6.9393	6.92534	-0.99672	9.88541e-50	down
CRTC3	64784	11.2654	11.1368	11.878	6.48786	5.94688	6.57633	0.850541	1.06001e-49	up
DAG1	1605	31.2186	30.9312	31.9252	20.3214	20.1935	20.7694	0.618292	2.36648e-49	up
STK17A	9263	12.2337	11.0964	11.9881	20.2196	19.4347	19.5767	-0.745942	3.4793e-49	down
C2CD2	25966	2.573	2.63769	2.47788	5.4962	5.16291	5.45764	-1.06777	3.64508e-49	down
SPIN1	10927,83985	43.2828	43.7135	44.3048	26.6932	25.1677	27.7157	0.722464	4.19775e-49	up
PSD4	23550	3.43451	3.85183	4.07822	1.62371	1.65123	1.62252	1.21444	4.4636e-49	up
RPS6	6194	192.137	192.771	197.438	283.617	323.274	291.688	-0.625766	4.7149e-49	down
S100A10	6281	455.131	464.399	479.87	267.885	277.589	302.916	0.722009	5.20784e-49	up
GDA	9615,8034	27.372	26.5533	27.3319	16.8863	15.0927	16.3776	0.748782	5.30457e-49	up
SQSTM1	8878	41.3146	41.5747	42.0166	59.8089	64.8266	59.6681	-0.561243	9.85257e-49	down
HEXIM1	10614	47.1402	48.7775	47.8736	29.8216	29.3508	30.1146	0.687454	1.03272e-48	up
HCAR3	8843	13.4778	13.5482	12.2625	28.4242	28.6329	25.9755	-1.07957	1.10745e-48	down
COPA	1314	11.6954	11.8082	12.26	16.77	16.9207	16.8034	-0.497623	1.21182e-48	down
LINC00431	104355135	1.13011	1.01056	0.536633	9.16711	8.08453	8.99764	-3.29342	1.36642e-48	down
WNT7A	7476	1.82301	1.79083	2.08795	5.2972	6.10739	5.40975	-1.56021	1.65603e-48	down
CLMN	79789	7.71665	7.98563	7.87557	12.7448	11.744	12.4065	-0.646003	2.28886e-48	down
LCP1	3936,9878	7.37889	6.3644	6.83026	13.8656	14.7125	13.1022	-1.01857	2.34401e-48	down
MCF2L2	23101	0.2063	0.213931	0.214222	0.717464	0.772471	0.794985	-1.84856	2.8508e-48	down
TRUB2	26995	9.44239	9.46077	10.0007	4.7506	4.9276	4.62671	1.01475	3.20212e-48	up
BCAT1	586	10.2885	9.72551	9.69994	19.0527	15.9697	18.0427	-0.836622	4.33829e-48	down
HOXD10	3236	0.958253	0.787701	0.624817	4.99548	4.60804	4.60796	-2.58363	6.04776e-48	down
PYGL	5836	38.82	39.1126	40.4958	56.8567	61.0026	58.022	-0.570588	6.15582e-48	down
GART	2618	42.6113	44.092	41.8278	62.2076	65.0066	61.6711	-0.555392	6.254e-48	down
SGK1	6446	5.76463	6.42509	6.57296	10.9674	11.2641	10.8353	-0.817517	6.9569e-48	down
HIP1R	9026	5.60838	5.68992	5.57219	10.4428	9.98774	9.78787	-0.840926	7.89052e-48	down
CCT8	10694	25.8015	25.568	24.9296	39.7147	41.2815	39.9684	-0.664846	1.02571e-47	down
KIF14	9928	22.2841	22.4645	22.8726	12.7642	10.5799	12.1606	0.929466	1.11999e-47	up
MT-TA		1052.59	1075.62	1067.53	1793.94	1751.1	1971.33	-0.787569	1.2742e-47	down
MYC	4609	30.8684	32.9922	31.2775	47.9412	50.2803	50.3628	-0.643188	1.63953e-47	down
PARP14	54625	38.6525	35.923	36.5035	23.617	21.3128	22.9414	0.710717	1.65405e-47	up
SMC2	10592,83452	20.8785	19.9336	20.2276	12.3611	11.3659	11.8213	0.779968	1.8263e-47	up
ZNF618	114991	7.35876	7.27481	6.97501	3.6892	3.39673	3.77182	0.992879	2.26358e-47	up
FKBP10	60681	27.7531	27.7205	30.7558	44.2618	45.0291	45.5702	-0.645223	2.38343e-47	down
EGLN3	112399	1.79732	1.67656	1.82429	4.21168	4.56897	4.08428	-1.27988	3.6968e-47	down
HENMT1	113802	24.3951	26.6413	26.4059	13.1456	12.1884	12.5923	1.02992	4.17072e-47	up
MPZL2	10205	12.9102	13.5579	13.9806	22.5369	22.858	21.7121	-0.730371	4.38972e-47	down
TARS1	6897	63.5229	67.2256	61.6906	97.0616	100.038	95.8791	-0.606393	5.6953e-47	down
MBOAT2	129642	5.25846	4.94545	4.78771	9.27418	8.94491	9.86255	-0.905471	7.33017e-47	down
GJB2	2706	3.90445	3.57999	3.15129	10.0038	11.3359	10.5332	-1.58341	8.4914e-47	down
UTP20	27340	6.87362	6.21875	6.46804	3.1089	2.90196	3.29676	1.07145	9.3201e-47	up
RPS5	6193	68.6481	67.1032	73.4706	111.358	130.12	111.229	-0.753439	1.04897e-46	down
ACADVL	37	24.4819	23.6568	25.681	40.1104	37.9837	36.8829	-0.639268	1.18676e-46	down
NEK9	91754	14.2578	14.5534	15.0368	8.6047	7.89697	8.96716	0.783777	1.20374e-46	up
CD46	4179	25.5539	24.418	25.2638	34.457	33.6997	34.3534	-0.446277	1.6722e-46	down
SYT8	90019	26.4817	25.0035	26.7463	13.7278	14.6641	12.2875	0.943453	1.86237e-46	up
WNT4	54361	5.39257	5.1818	5.25643	1.95323	1.80178	1.93376	1.47655	2.1236e-46	up
ZNF207	7756	22.8464	22.1626	22.3761	15.4241	14.5729	14.8981	0.585872	2.53586e-46	up
RIOK3	8780	21.6493	22.4757	21.2776	34.8266	33.3924	33.8728	-0.642448	5.38133e-46	down
SIPA1	6494	13.0258	12.8953	13.9939	21.4514	21.8547	21.8159	-0.706212	5.54772e-46	down
AOC2	314	1.7302	1.42598	1.62849	7.49521	5.82212	6.05004	-2.01714	6.10106e-46	down
CAPRIN1	4076	58.2585	59.2342	57.3909	39.0261	40.3397	39.0866	0.562088	6.34722e-46	up
GRHL1	29841	1.3547	1.29045	1.5505	3.51195	3.62576	3.94253	-1.40102	9.544e-46	down
EAF1	85403,10847	8.73722	8.91741	8.64312	15.089	15.6376	16.5061	-0.844848	1.0592e-45	down
QSOX1	5768	5.48082	5.09789	6.00417	10.0107	9.76191	9.7715	-0.833176	1.22847e-45	down
ZNF268	10795	3.88885	3.87773	3.96086	1.92088	1.66843	1.8972	1.09593	1.6051e-45	up
CDC25B	994	34.3501	35.7063	35.4224	20.7555	20.9918	21.8383	0.730182	1.79468e-45	up
ZNF121	7675	5.3819	4.81354	5.35638	10.459	9.61675	11.4631	-1.02005	2.21085e-45	down
MYL9	10398	17.4671	17.261	17.5427	8.35151	7.21744	8.15196	1.13985	2.74096e-45	up
IL1RAP	3556	6.41995	6.75528	6.95777	10.5506	10.6352	10.7859	-0.667236	2.8097e-45	down
AGFG1	3267	8.84486	9.23918	8.69286	15.0072	14.2714	14.1406	-0.697345	2.99515e-45	down
CBLC	23624	12.3082	12.3749	13.0105	26.9366	29.5101	25.3498	-1.11772	3.05954e-45	down
PPARG	5468	0.591723	0.572371	0.594237	1.62718	1.6526	1.71109	-1.50508	4.24717e-45	down
TNNT3	7140	3.62898	3.44781	3.95937	0.666238	0.666941	0.534295	2.56308	4.96909e-45	up
CDKN1A	1026	8.05039	8.52794	8.1032	16.0721	17.603	16.2744	-1.01704	5.21914e-45	down
KLF11	8462	1.79812	1.62602	1.98185	5.46407	4.8024	5.55075	-1.54887	8.08086e-45	down
CNP	1267,4880	13.1549	14.3978	13.9732	7.09545	7.85294	7.18616	0.907707	9.00652e-45	up
CYP26B1	56603	4.07528	4.4407	3.93347	8.9752	9.23584	8.69291	-1.11173	9.61565e-45	down
RPL15	6138	92.9011	93.4022	94.6548	139.053	159.582	138.175	-0.63665	1.02672e-44	down
DBNL	28988	8.92934	8.79842	9.43297	5.45215	5.46956	5.47593	0.728035	1.23636e-44	up
ENSG00000257732		0.859944	1.51546	1.9366	12.1297	14.2774	15.0552	-3.26537	1.35664e-44	down
APC	324,5624	7.69314	8.00869	7.23153	3.75309	3.08384	3.71145	1.12043	1.92679e-44	up
SETD2	29072	8.32884	8.26649	7.91433	4.89773	4.77539	4.71794	0.768177	2.01387e-44	up
ILF3	3609	36.5737	36.9823	37.4426	24.7779	25.0119	25.9445	0.551523	2.55095e-44	up
HMGN3	9324	74.1183	78.2805	74.578	41.1849	41.7607	40.5511	0.878073	2.58364e-44	up
MT-TC		1195.92	1310.11	1151.22	2087.34	2138.83	2073.05	-0.784413	3.12452e-44	down
PICALM	8301	12.5887	13.2704	12.1559	21.5114	20.9388	20.2968	-0.722975	5.95741e-44	down
DBN1	1627	5.38825	6.13124	5.23014	11.2383	11.7536	11.9369	-1.06029	6.3783e-44	down
NET1	10276,55119,6530,9152,10103	27.7138	27.7632	27.9606	41.8914	43.7888	40.09	-0.592019	9.64458e-44	down
LAMB1	3912	4.47034	4.4282	4.56644	6.74837	6.79812	6.99992	-0.609674	1.07571e-43	down
COL12A1	1303	6.75437	6.64288	6.87027	4.13012	3.84658	4.15835	0.739989	1.11551e-43	up
VPS41	27072	15.5186	14.8767	15.1796	9.29341	8.8534	8.42044	0.778591	1.1607e-43	up
AQP3	360	59.0821	60.1022	62.6882	86.0261	90.2547	86.3061	-0.529868	1.23735e-43	down
TYRP1	7306	7.24372	7.42311	7.21906	2.42103	2.0749	2.72278	1.60019	1.27193e-43	up
FNDC3B	64778	5.41834	5.5903	5.53981	9.03683	8.46362	9.04099	-0.68155	1.33182e-43	down
RPL7P1	6174	136.982	139.97	142.35	237.202	257.704	217.192	-0.764086	1.45531e-43	down
RAPGEFL1	51195	20.8061	21.5366	22.3096	12.3221	12.9824	11.5664	0.810216	1.49135e-43	up
EP300	2033	23.419	22.8176	22.7353	13.5839	11.8958	14.0061	0.804671	1.66815e-43	up
FGF3	2248	9.07068	7.51447	9.46617	1.8309	1.21668	1.72318	2.44906	2.50315e-43	up
TTC7B	145567	2.76749	2.86643	2.80734	4.5132	4.90868	4.64296	-0.736563	3.50285e-43	down
B3GNT3	10331	2.78738	3.15886	3.1503	8.45394	8.34456	7.85498	-1.4384	3.77469e-43	down
MYCBP2	23077	5.37214	4.99467	5.0506	3.15939	2.76348	2.81105	0.81986	4.33546e-43	up
ATP10D	57205	6.11408	6.05034	6.18007	3.13731	3.08121	3.12293	0.973627	6.80669e-43	up
PPARA	5465	7.71737	7.54256	8.11159	12.0191	11.6313	12.6476	-0.635137	8.19843e-43	down
PKP2	5318	9.43063	9.48463	9.1165	14.6795	14.4642	13.9713	-0.621127	8.58001e-43	down
MT-TY		1431.24	1582.36	1469.61	2366.1	2406.83	2428.54	-0.683758	9.14853e-43	down
SPAG5	10615	38.9884	37.329	37.1035	22.9757	23.7851	21.1728	0.739489	9.63998e-43	up
FADS3	3995,285489	9.21542	10.092	10.247	17.4195	19.665	16.9053	-0.869314	1.23899e-42	down
COQ8B	79934	4.52076	4.3539	4.7989	2.04584	2.33954	2.19979	1.0541	1.44743e-42	up
UBTF	7343	19.9105	19.968	20.9436	13.0664	12.8313	12.632	0.658621	1.84432e-42	up
SLC7A11	23657,682	14.2846	13.0848	14.1737	26.897	21.9629	27.195	-0.872431	2.29799e-42	down
IL1A	3552	53.9887	54.9602	55.2978	83.4521	82.9173	78.62	-0.576855	3.01241e-42	down
PDLIM1	9124	92.9221	94.9201	92.0942	137.572	155.259	140.65	-0.630868	3.25275e-42	down
LDHA	3939	96.4995	93.9803	95.9852	126.091	126.21	123.083	-0.390009	3.95126e-42	down
FAM83D	81610	35.3609	38.7015	34.7112	18.2975	19.7578	17.8139	0.961203	4.00798e-42	up
PROSER1	80209	5.22172	5.46564	5.12529	9.34588	9.25351	9.92872	-0.851306	4.07962e-42	down
ZBTB38	253461	4.74336	4.83564	4.83671	2.41064	1.91425	2.26869	1.12851	4.15925e-42	up
RBM3	5935	42.8925	42.6866	46.4212	27.3497	26.2183	28.7814	0.680711	4.24377e-42	up
SMS	6611,10743	56.8235	52.7739	55.722	81.0564	84.0535	82.005	-0.579925	4.51718e-42	down
VDAC3	7419,10187	102.4	110.063	111.879	63.3924	69.8754	61.403	0.73648	4.61769e-42	up
ZNF217	7764	17.2764	16.5384	17.1621	25.7353	24.6175	25.1529	-0.566741	4.62042e-42	down
DGKA	1606	6.3758	6.31092	6.17267	10.2355	10.9398	9.98023	-0.724205	5.5047e-42	down
ENDOD1	23052	3.46981	3.21711	3.48681	7.10356	7.18882	7.39884	-1.09226	6.48201e-42	down
MMP1	4312	47.0531	45.3424	45.7573	26.7238	28.0289	24.6757	0.798539	8.37529e-42	up
DUSP1	1843,11266	3.92456	4.17893	5.32734	12.6658	13.3128	13.1028	-1.54093	9.68882e-42	down
RBM47	54502	6.17007	6.14044	6.40602	9.9797	9.97748	9.94382	-0.67588	1.05576e-41	down
ATXN1	6310	0.684547	0.612648	0.720393	1.68152	1.52668	1.81919	-1.31718	1.07878e-41	down
TNFAIP8	25816	2.75124	2.69977	2.57714	5.42794	5.1236	5.2272	-0.974841	1.20465e-41	down
SERPINE2	5270	1.41942	1.48937	1.67956	3.65204	3.54168	3.43012	-1.21126	1.27451e-41	down
FEN1	2237	72.0474	69.7295	76.1008	43.5025	46.6239	43.2918	0.707564	1.38722e-41	up
NOTCH1	4851	13.9055	13.592	13.7929	9.05666	8.27159	8.48128	0.677902	1.95575e-41	up
CDCA7	83879	13.1792	12.9614	14.0506	21.6951	21.5216	20.767	-0.670821	2.23861e-41	down
ZNF274	10782	2.42271	2.36623	2.39206	4.97781	4.94291	4.56497	-1.01237	2.52197e-41	down
RPL6	6128	138.21	134.558	139.265	197.274	219.853	192.795	-0.565867	2.54276e-41	down
RCC1L	81554	16.9768	17.475	17.0024	9.74235	9.39562	9.59819	0.840422	2.6056e-41	up
STK24	8428	15.0286	15.4357	15.0914	21.7132	21.3067	22.4833	-0.523932	2.86785e-41	down
PPIA	5478	280.81	270.516	286.408	178.95	198.335	178.737	0.591348	2.89938e-41	up
BACE2	25825	0.699382	0.745173	0.762851	1.9835	1.99924	2.09691	-1.46164	3.58904e-41	down
PICK1	9463	13.3294	14.0163	13.9948	7.07724	7.51141	6.82826	0.948805	3.74551e-41	up
SEL1L3	23231	5.91001	6.86104	6.49119	11.2507	12.1031	11.7892	-0.86746	4.23124e-41	down
MATN2	4147	1.60101	1.5648	1.57474	3.56204	3.92539	3.93677	-1.26897	4.9297e-41	down
TES	26136	14.4131	15.7539	15.615	24.3962	25.8883	25.0757	-0.719024	5.19439e-41	down
IFIT5	24138	17.6532	17.0288	16.4702	9.59175	9.32411	9.33884	0.856306	5.6834e-41	up
TBC1D2	55357	11.7163	12.3045	12.6182	21.3875	20.3042	20.4245	-0.761593	6.46652e-41	down
PPP1R18	170954	8.52372	8.84919	8.82747	14.5076	15.6929	15.4699	-0.801674	8.05707e-41	down
C6orf132	647024	3.92818	3.74159	3.95609	6.38956	5.98106	6.5102	-0.699585	8.42036e-41	down
OSBPL1A	114876	4.62834	4.36191	4.41039	7.67871	7.83881	7.85692	-0.802629	8.44736e-41	down
ENO2	2026	3.60401	3.03451	3.60446	9.50621	9.08726	7.56381	-1.35258	9.08348e-41	down
TEX261	113419	18.089	18.4209	17.7336	9.17282	10.0552	10.0031	0.891943	1.12804e-40	up
PTK2B	2185	2.78208	3.10457	3.05842	6.39841	6.02171	5.71144	-1.01934	1.20592e-40	down
NUDCD3	23386	14.0608	13.7253	14.5829	8.26633	8.9078	8.8379	0.70383	1.40093e-40	up
BRD8	10902	15.6505	17.3722	17.6217	9.93711	9.44819	9.29176	0.820506	1.47683e-40	up
ITGA3	3675	48.994	49.1953	50.7127	66.5364	65.5006	69.4505	-0.436327	1.60197e-40	down
STK3	6788,8428	2.90271	2.79321	2.79529	4.94346	4.87825	4.83745	-0.787759	1.71247e-40	down
PTPRH	5794	1.66078	1.82547	1.96908	4.97082	4.74689	5.16412	-1.44782	2.06002e-40	down
ARHGEF4	50649	2.15384	1.98958	1.96961	4.17745	4.03224	3.93256	-0.990076	2.73633e-40	down
DHX58	79132	14.6774	14.1563	14.4063	7.1682	7.82149	7.06729	0.971128	3.09738e-40	up
TMEM156	80008	2.90566	3.43582	2.84021	9.42007	8.79164	8.31645	-1.53069	3.29412e-40	down
FIGNL1	63979	16.3782	16.4643	17.1678	9.59348	9.38416	9.98785	0.78789	3.89052e-40	up
LINC01234	100506465	3.62318	3.38547	3.51907	1.71159	1.65406	1.4912	1.1161	4.22742e-40	up
LAMA3	3909,3910	2.97121	2.95376	2.96782	5.06137	4.79188	4.98677	-0.738784	4.29549e-40	down
SUPT4H1	6827	47.5194	48.15	49.6204	26.3919	29.4631	27.6249	0.799431	4.78069e-40	up
HGS	9146	9.7732	8.98029	9.25239	14.072	14.9054	14.1654	-0.623389	5.0261e-40	down
PIGR	5284	0.520177	0.627196	0.7229	2.66972	3.02971	2.64108	-2.15689	5.14329e-40	down
NOLC1	9221	59.087	61.8818	61.7105	83.4712	84.5518	86.1527	-0.476512	5.3255e-40	down
RPS3A	6189	250.74	242.501	258.73	350.938	385.236	345.372	-0.524347	5.65509e-40	down
RNF169	254225	3.32469	3.10634	3.12097	6.85147	5.98244	7.26258	-1.07307	6.80614e-40	down
KPNB1	3837	49.7087	50.3681	50.2426	34.2025	35.176	35.9075	0.513718	7.379e-40	up
SOX7	83595	2.39471	3.10057	2.85043	8.46873	7.31452	8.75866	-1.55614	7.40861e-40	down
INO80	54617	5.3852	5.6002	5.28089	3.18396	3.1808	3.17571	0.769753	7.57889e-40	up
EMC10	284361	9.94259	9.82303	10.5341	6.30823	6.15687	6.17198	0.70113	7.7153e-40	up
TBC1D16	125058	4.22421	3.95208	4.15972	7.1799	6.62461	7.32591	-0.776447	1.02165e-39	down
ABR	29	3.98493	3.74644	4.17371	1.89449	2.05915	1.87536	1.03026	1.02611e-39	up
OLA1	29789	12.7802	13.0129	13.2249	19.3572	19.5749	19.9245	-0.593064	1.16359e-39	down
GANC	2595	5.24079	5.2477	5.61827	2.62668	2.4567	2.6582	1.05697	1.18407e-39	up
GAS5	60674	19.8873	20.2957	22.3881	33.8146	37.6768	32.8895	-0.738292	1.28614e-39	down
MAPK6	5597	22.781	22.5412	22.2959	31.9651	31.5131	31.7537	-0.494037	1.75977e-39	down
COPB1	1315	56.6178	54.8427	56.3015	76.6567	76.9633	73.5834	-0.437569	1.76351e-39	down
POLR2L	5441	25.4537	26.6462	25.7616	10.1865	10.9037	8.84832	1.37891	2.48294e-39	up
CCNJL	79616	3.64197	3.54413	3.31848	1.50238	1.54458	1.48944	1.2114	2.60564e-39	up
RPL5	6125	159.364	149.484	157.245	227.591	255.298	220.399	-0.5935	2.86897e-39	down
PROM2	150696	4.93875	4.85266	5.33526	9.72907	8.88967	9.09395	-0.873452	3.07206e-39	down
RIPOR1	79567	4.93502	5.08347	5.4628	10.9129	9.45952	12.1973	-1.07301	3.09068e-39	down
NBL1	4681,100532736	5.63466	6.33098	6.72863	12.7125	12.733	12.6622	-1.02749	3.09302e-39	down
CEL	1056	19.9475	17.6742	19.1442	8.89173	9.18245	9.35926	1.04909	4.5544e-39	up
GFOD1	54438	1.40642	1.49167	1.65432	3.52569	3.34243	3.15167	-1.13815	4.59606e-39	down
ENO1	2023	167.891	163.648	169.303	218.471	232.128	217.797	-0.416345	4.83617e-39	down
C18orf25	147339	3.90624	3.96636	4.13898	7.47874	6.63667	7.34488	-0.837242	4.99919e-39	down
GALC	2581	9.09348	9.22755	9.32777	4.71172	4.88498	5.1936	0.902566	6.02906e-39	up
LAMP2	3920	26.7193	27.5287	26.6118	37.4606	36.8089	38.3391	-0.477824	7.10392e-39	down
RCN1	5954,1827	55.2028	57.1599	55.2123	36.1219	36.6752	37.8883	0.598343	8.50319e-39	up
GTSE1	51512	45.7569	47.2525	49.9229	29.4277	31.5111	29.889	0.654126	9.33744e-39	up
TRIM37	4591	22.4587	22.4061	21.2357	13.2065	13.6677	12.9126	0.73237	1.33458e-38	up
IRF2BP2	359948	10.258	10.9085	10.4139	16.6435	17.3802	17.2164	-0.698246	1.59161e-38	down
ALDH3B1	221	5.2132	5.8984	5.58669	10.4408	10.4073	9.65786	-0.869391	1.78699e-38	down
ELL2	22936	6.15011	6.08324	6.05973	12.7719	10.4631	11.1367	-0.909921	2.41406e-38	down
UBE2V2	7336	12.6046	12.0025	12.9928	18.8707	19.1094	18.442	-0.585534	2.74274e-38	down
TRIB3	57761	7.62561	8.97206	8.91921	16.501	18.866	17.0238	-1.03786	2.79694e-38	down
LRP11	84918	16.6242	16.2982	16.699	23.8098	23.6681	24.383	-0.534247	3.5509e-38	down
TCF25	22980	8.51521	8.60549	9.00236	5.11388	4.77751	4.80932	0.829438	3.66791e-38	up
FANCI	55215	23.1851	22.3043	22.2748	15.8943	14.6597	14.851	0.577672	4.24596e-38	up
TPT1	7178	111.323	114.737	113.542	159.925	176.886	155.615	-0.536065	4.9547e-38	down
TNNT1	7138	4.9171	4.56116	4.05708	12.4196	14.4561	11.3664	-1.49843	5.20416e-38	down
SH3KBP1	30011	1.80924	1.87882	1.97324	3.47545	3.54896	3.23734	-0.858071	5.39633e-38	down
NAA60	79903	9.49305	9.45065	9.46395	5.47271	5.55735	5.28546	0.800034	7.38647e-38	up
DHX9	1660	54.9078	54.495	53.9293	34.8354	37.8859	36.1369	0.585358	7.45318e-38	up
ENSG00000262879		3.32959	3.23344	3.37159	1.69632	1.80082	1.81927	0.902015	7.56704e-38	up
SNRPA1	6627	54.5068	53.764	55.1849	76.3904	83.0216	75.8931	-0.525634	8.36256e-38	down
PDXDC2P-NPIPB14P	283970	5.18724	4.61887	5.31679	9.89751	9.46477	8.89786	-0.902034	8.99227e-38	down
SERTAD2	9792	6.40925	6.65037	7.28014	11.9444	11.3511	12.4795	-0.814646	9.11133e-38	down
ZFX	7543	7.7568	7.41734	7.37145	4.02991	4.24756	4.25449	0.847232	9.73429e-38	up
CXCL2	2920	7.96674	9.43865	8.38704	1.92888	2.15573	2.09967	2.06027	1.12259e-37	up
SLC38A2	54407	61.196	61.5604	61.3055	87.1153	81.4945	89.6848	-0.488825	1.14691e-37	down
MRPL46	26589	10.2232	10.1321	10.9906	5.0636	5.8463	5.43243	0.93966	1.2499e-37	up
NOP53	29997	9.69143	8.64335	9.89688	15.865	16.6076	15.4616	-0.763741	1.59917e-37	down
ANO1	55107	14.8134	16.2127	16.0204	9.21577	8.92464	9.32398	0.776525	1.72093e-37	up
LITAF	9516	26.9562	28.0281	27.5856	39.3048	38.4648	39.7488	-0.509197	1.83354e-37	down
TFPI2	7980	9.8565	12.0029	9.86937	21.682	23.0574	22.4823	-1.08313	2.3231e-37	down
HLA-B	3106	67.8867	66.1838	66.7011	92.0068	99.1447	90.9272	-0.490543	2.3876e-37	down
VASP	7408	15.8274	16.1584	16.2729	25.1677	28.9769	27.3783	-0.756417	2.76817e-37	down
INHBE	83729	0.917661	1.16782	1.0709	3.70251	4.66613	4.51974	-2.02973	2.95796e-37	down
TCP1	6950	57.2787	58.698	57.7094	77.5955	77.9579	77.0042	-0.421106	3.08566e-37	down
PTK2	5747	8.94841	9.27657	9.29688	12.8927	13.346	13.0496	-0.513522	3.08662e-37	down
MAP1B	4131	0.397324	0.42081	0.502725	1.38774	1.283	1.51242	-1.66311	3.09313e-37	down
NFKB1	4790	5.81956	5.93743	6.13427	3.56905	3.42684	3.68621	0.744061	3.20285e-37	up
LMNA	4000	27.0527	25.3143	27.3851	36.7978	38.804	36.6723	-0.493431	3.23659e-37	down
GPSM1	26086	3.30197	3.3037	3.67753	6.68925	7.17597	7.15422	-1.03144	3.5173e-37	down
THRAP3	9967	41.6426	42.4496	41.5135	26.2581	27.5691	28.0358	0.617619	3.75563e-37	up
CMTR2	55783	9.04533	8.50473	9.17568	13.7538	13.4794	13.5151	-0.608511	4.4428e-37	down
CSF1	1435	12.9783	12.6952	12.5019	6.92771	7.16258	7.34399	0.832725	5.21354e-37	up
DDX42	11325	31.2802	29.3546	30.836	21.0978	21.1292	20.7189	0.539199	6.48429e-37	up
RBM15B	29890	11.085	11.3902	10.325	5.92656	5.64673	6.04972	0.896245	7.13873e-37	up
SLC39A9	55334	23.7143	24.1439	24.3104	14.9465	15.6761	16.0803	0.627858	7.27502e-37	up
DLGAP1-AS2	84777	3.10415	2.93605	2.93602	6.53692	7.26031	6.97844	-1.21072	8.09958e-37	down
GOLT1B	51026	16.4942	14.523	14.8576	29.517	25.1534	27.4744	-0.840468	8.40107e-37	down
LHFPL2	10184	1.46502	1.50361	1.2805	3.54601	3.25845	3.46257	-1.27278	9.21318e-37	down
RBM4B	83759	10.2886	9.66204	10.8522	5.16413	5.21167	4.77975	1.02322	9.28647e-37	up
DTX3L	151636	34.7173	36.8792	34.7663	21.8541	22.4175	23.289	0.65474	1.04817e-36	up
MMP7	4316	5.84046	5.38697	5.84702	1.2731	1.65965	1.22101	2.03935	1.13778e-36	up
SH3BP5L	80851	7.18786	6.79472	6.9871	3.58597	3.45902	3.4495	0.998674	1.30648e-36	up
TPCN2	219931	9.385	9.76056	10.3458	4.94577	5.56739	4.74171	0.951021	1.38908e-36	up
SHC1	6464	27.5769	28.2035	28.4005	40.1117	38.979	40.4289	-0.505682	1.42501e-36	down
IFI44L	10964	23.0591	20.79	21.865	13.93	12.1191	13.5244	0.731666	1.62918e-36	up
RIC8A	60626	15.9546	16.7723	16.8792	8.34908	9.89855	8.42902	0.894942	1.6466e-36	up
CCAR1	55749	30.5645	30.6423	29.5238	19.9705	18.6899	19.7334	0.635775	1.65387e-36	up
KDELR3	11015	13.2491	12.9422	11.2986	25.0344	24.7368	25.1769	-0.99939	1.69673e-36	down
TUBB	203068,7280	211.345	218.061	217.48	146.863	157.251	144.513	0.527994	1.9338e-36	up
EDEM1	9695	7.57401	8.27229	8.61127	16.0913	13.4926	16.5277	-0.914851	2.2289e-36	down
BRIX1	55299	10.8543	11.1736	12.1672	18.6409	18.0521	19.1024	-0.706354	2.37319e-36	down
RPL32	6161	52.8559	56.5982	58.4062	84.8046	99.5761	85.9122	-0.687263	2.40207e-36	down
KIF22	3835	20.726	20.7844	22.06	13.8857	14.1121	13.9111	0.601099	3.21002e-36	up
MRPS35	60488,28957	31.9602	30.9631	32.2022	47.944	52.2732	49.5618	-0.654931	3.79167e-36	down
HNRNPDL	9987	61.6911	59.2465	61.328	43.0653	43.662	41.7255	0.504804	4.10295e-36	up
MIR4435-2HG	541471	0.491645	0.472517	0.482986	0.98144	0.988271	0.929206	-1.0023	4.69294e-36	down
S100A11	6282	474.094	500.057	488.974	293.944	331.82	304.507	0.65333	6.22147e-36	up
CENPH	64946	11.1442	10.5037	11.7936	20.181	20.2903	20.8191	-0.874021	6.36584e-36	down
BCAN-AS1	105371453	0.210982	0.18187	0.197159	1.78325	1.52119	1.76003	-3.1016	6.68061e-36	down
BAZ2B	29994	3.79317	3.6898	3.8974	2.31943	2.18732	2.13111	0.777756	6.91345e-36	up
MIR31HG	554202	1.02812	1.0643	1.14508	0.333247	0.341504	0.392686	1.60073	7.35177e-36	up
RSL24D1	51187	13.6407	14.0766	14.2575	20.0058	20.6223	20.6781	-0.546512	7.62191e-36	down
ITGB8	3696	1.72678	1.60561	1.8045	0.687705	0.538041	0.65762	1.44758	8.29915e-36	up
TP63	8626	32.4927	32.0747	34.137	45.3741	44.1318	47.4771	-0.47281	8.48359e-36	down
KDM7A	80853	1.12272	1.41225	1.2522	3.44748	2.96278	3.10748	-1.3295	1.009e-35	down
LARP1	23367	31.409	31.881	32.3978	20.9301	19.5786	22.154	0.610728	1.08036e-35	up
TMEM40	55287	8.14678	7.26151	7.62643	14.3754	14.3851	13.7657	-0.884543	1.29875e-35	down
OXSR1	9943	10.5673	10.8942	11.9117	17.6533	17.3464	17.195	-0.645214	1.37231e-35	down
CHTOP	26097	33.5611	31.7565	33.7554	22.0571	22.6609	22.0344	0.569672	1.37297e-35	up
RPL8	6132	351.681	338.76	366.13	479.354	535.947	482.919	-0.50386	1.63797e-35	down
WBP1L	54838	7.50538	7.39205	7.73362	4.19763	4.01213	4.35061	0.849426	1.84661e-35	up
CALR	811	178.104	175.124	177.242	232.893	258.174	243.116	-0.468866	2.05914e-35	down
FHOD1	29109	3.06416	3.1261	3.72501	6.95898	6.85644	7.18678	-1.08282	2.17061e-35	down
ZWINT	11130	58.7432	59.2052	59.9517	36.0384	39.1136	34.8456	0.693596	2.27189e-35	up
CHMP6	79643	18.9483	19.5468	18.6449	8.57385	9.62591	8.10863	1.11898	2.45137e-35	up
PEG10	23089	19.6743	21.4498	20.8994	11.5513	9.4705	11.6348	0.92544	2.52033e-35	up
KDM3A	55818	5.37705	5.03704	5.15714	9.53708	8.45418	8.115	-0.745513	2.89508e-35	down
IFITM2	10581	11.092	9.69258	8.65628	21.5595	23.2524	24.5324	-1.23596	3.08741e-35	down
TTLL3	26140	1.3923	1.39481	1.47043	2.8735	2.98059	2.82233	-1.02708	3.15085e-35	down
STRA6	64220	0.0902022	0.101618	0.0910992	0.663949	0.823456	0.774506	-2.99908	3.62981e-35	down
CRNDE	643911	0.976709	0.959524	0.857284	2.20594	1.95088	2.13282	-1.17089	3.78895e-35	down
PLEKHB2	55041	12.0988	11.7995	11.4739	18.1635	17.585	17.4317	-0.588273	3.81245e-35	down
PDGFA	5154	7.11221	7.1547	7.79693	12.4695	12.4047	12.7195	-0.768806	4.28085e-35	down
SERPINA3	12	4.5627	4.63549	4.92138	1.80477	2.01741	1.73501	1.34527	4.78815e-35	up
DUSP7	1849	8.00325	8.57655	7.79828	13.8579	15.022	13.4673	-0.796682	6.05491e-35	down
AOC3	8639	0.533853	0.54938	0.679066	3.50671	2.699	2.24099	-2.26093	6.88321e-35	down
RBL2	5934	17.0883	17.316	16.911	24.3982	23.7781	23.5877	-0.483871	7.2145e-35	down
SCNN1A	6337	35.2044	36.2217	35.0457	47.8189	49.8848	49.5833	-0.468159	9.24655e-35	down
CHD2	1106,1826	10.1989	9.3037	10.2733	14.055	13.7557	14.2979	-0.499968	1.00699e-34	down
ATF5	22809	6.86463	6.83748	6.70039	2.40909	2.6639	2.17267	1.49356	1.06391e-34	up
PLAG1	5324	2.19503	2.21459	2.15933	4.35535	4.17406	4.62968	-1.00233	1.3641e-34	down
SERPINB1	1992	52.0282	51.6572	52.2199	73.2164	80.1831	72.7065	-0.536328	1.75141e-34	down
TRO	7216	2.5148	2.29366	2.45872	0.826696	0.633816	0.758716	1.71134	1.82122e-34	up
URB1	9875	1.95889	1.82131	2.06889	3.72195	3.58548	3.59207	-0.897978	1.84132e-34	down
CASP7	840	17.0693	18.4477	17.6452	8.65828	10.0153	8.82602	0.950991	1.93878e-34	up
LTB4R	1241	6.26476	5.82465	6.39265	11.5906	10.5824	11.0131	-0.844455	2.43735e-34	down
ARFGAP3	26286	29.5946	29.9381	30.6713	44.0373	46.7061	42.6098	-0.563989	3.65035e-34	down
PRKDC	5591	19.3515	18.4417	19.4118	27.1283	24.7619	27.3828	-0.470686	3.72042e-34	down
HDDC3	374659	10.5762	9.95586	9.81037	4.19816	5.26283	4.71748	1.09763	4.09197e-34	up
SH3BP1	23616	14.4463	13.9453	14.4428	20.7955	22.1626	22.4865	-0.611501	4.24222e-34	down
CRKL	1399	15.8285	17.5796	17.5073	26.4722	25.3283	26.5011	-0.620942	4.43874e-34	down
PEX11A	8800	10.1197	9.84174	10.1793	4.94787	4.57075	4.80881	1.07294	4.58221e-34	up
KIAA0100	9703	34.2252	35.2302	35.6771	25.0686	24.684	25.2071	0.488021	4.83518e-34	up
PRKAB2	5565	5.4027	5.16228	5.71395	9.86707	9.10002	9.89886	-0.826363	4.98555e-34	down
TMBIM6	7009	173.066	177.488	177.473	221.333	231.906	226.342	-0.364035	5.26724e-34	down
BCAR3	8412	5.13716	4.48985	4.18775	8.8877	9.51976	8.58152	-0.966159	6.46666e-34	down
EXOC7	23265	10.6214	11.4006	11.4547	6.7626	7.11515	6.84951	0.69163	6.91024e-34	up
RHOG	391	18.4473	18.5193	19.5654	7.69555	8.62617	9.07617	1.15436	7.06045e-34	up
NAE1	8883	14.1997	13.6582	13.9145	20.7439	21.3816	20.4891	-0.583947	7.27691e-34	down
LANCL2	55915	4.80792	4.72887	4.91283	1.91249	2.18614	1.83192	1.28479	7.41662e-34	up
SPDL1	54908	16.0335	14.727	15.5944	8.96053	8.9688	9.28401	0.768408	7.56631e-34	up
FAIM	55179	5.20973	5.91277	5.90593	2.02464	1.9079	2.32662	1.4439	7.67727e-34	up
LIG3	3980,121227	5.39851	5.87517	5.76501	3.37577	3.2162	3.18978	0.800649	8.89785e-34	up
SLC6A8	6535	1.84826	1.83199	1.4432	4.83532	4.22433	4.56834	-1.41139	9.93057e-34	down
RNF187	149603	11.9405	12.245	12.4592	17.6304	17.4279	18.1831	-0.538942	1.35514e-33	down
CTCF	10664	12.2034	11.3334	12.4249	7.74574	7.47906	7.70413	0.649291	1.61983e-33	up
KIF23	9493	23.855	23.2511	23.4049	16.0785	15.8598	15.7909	0.562975	1.93238e-33	up
MRPS10	55173	35.4124	35.7256	35.381	52.5796	51.4223	54.4482	-0.572919	2.03991e-33	down
RPL14	9045	25.6971	25.9864	31.2319	42.4425	47.9002	44.0022	-0.696229	2.13809e-33	down
ACSS2	55902	6.22556	6.57668	6.89566	11.7521	11.4766	10.7406	-0.78619	2.18442e-33	down
ST3GAL1	6482	5.0718	5.43867	5.26001	8.25069	8.85845	8.61601	-0.705954	2.2449e-33	down
MAFK	7975	3.41654	3.42105	3.32385	6.80393	6.61089	7.22236	-1.02214	2.32635e-33	down
PIGO	84720	6.33685	6.4195	6.73461	3.22365	3.2513	3.70361	0.937272	2.67923e-33	up
ERAL1	26284	47.5642	45.7464	47.9796	28.9083	30.5474	27.5424	0.699606	2.80678e-33	up
PPP1R10	5514	20.9779	21.6844	21.7158	13.8881	13.5198	14.0033	0.63655	2.93766e-33	up
BST2	684	57.0473	56.1735	60.9338	87.6506	97.5927	90.4086	-0.66248	3.23956e-33	down
MRPS30	10884	7.56722	8.18594	7.53188	12.6593	12.7058	13.7359	-0.747801	3.26952e-33	down
ASB7	140460	12.3231	12.1858	12.5918	17.9708	18.7024	18.3678	-0.56906	3.73609e-33	down
UBE2L6	9246	100.515	96.1981	95.9052	64.0584	67.2818	62.2343	0.596129	3.97746e-33	up
DOCK6	57572	2.98037	3.03427	3.12864	6.28275	5.04073	5.66903	-0.894115	4.11789e-33	down
CLEC2B	9976,51266	8.35773	7.51168	8.24601	15.1943	15.1007	14.8564	-0.904813	4.19127e-33	down
LOXL4	84171	24.123	22.249	22.6308	14.1452	13.5283	13.3621	0.749779	4.32787e-33	up
LGALS9	3965	4.45289	4.15141	4.54705	1.79987	1.98041	1.71523	1.25888	4.43515e-33	up
MMP13	4322	67.9372	70.7574	67.9409	94.5017	97.79	93.4587	-0.467668	4.78414e-33	down
TP53BP1	7158	12.9699	11.9374	13.0806	8.45642	8.2273	8.39726	0.598951	4.92138e-33	up
MIR29B2CHG	100128537	0.246305	0.204919	0.259767	0.813445	0.732598	0.751417	-1.69214	5.38182e-33	down
RPL11	6135	105.334	99.2675	102.073	146.365	161.109	140.52	-0.546773	5.41478e-33	down
NMD3	51068	21.5817	20.9845	20.7456	31.2285	29.966	29.7488	-0.522495	5.52461e-33	down
DOCK9	23348	3.29124	3.31033	3.3212	5.18902	5.0162	5.08392	-0.623692	5.56466e-33	down
VDAC1	7416	68.5113	69.2558	69.8775	91.9518	93.0695	90.1227	-0.40607	5.8505e-33	down
ZBTB10	65986	1.21906	1.32075	1.32431	3.09405	2.57912	2.96984	-1.16139	7.34115e-33	down
TKT	7086,4921	43.7022	43.4723	45.6721	56.2128	59.0169	58.2725	-0.385193	7.38999e-33	down
SLC1A3	6507	1.09986	1.11749	1.13596	1.98235	1.94864	1.9881	-0.819789	8.42777e-33	down
LMAN1	3998	17.3102	17.496	16.8134	25.6635	24.1642	25.7995	-0.550988	8.49771e-33	down
HES1	3280,8209	14.2526	13.2575	14.3911	23.5622	26.5966	24.9561	-0.842107	8.80546e-33	down
ZNF518A	9849	11.7449	11.1023	11.7415	7.05255	5.78629	6.71427	0.822907	9.24808e-33	up
LINC02577	111216280	2.43351	2.25072	2.58771	5.4832	5.97229	5.18604	-1.19438	9.51404e-33	down
SRSF1	6426	73.0433	69.0974	71.5571	51.746	48.5349	50.6354	0.501823	9.79363e-33	up
STX10	8677	10.8619	11.3418	11.3149	20.5103	25.1275	22.8485	-1.03085	9.93911e-33	down
STIL	6491	17.2083	16.5454	16.262	10.9198	10.1655	10.6675	0.6555	1.03234e-32	up
LINC00472	79940	0.324544	0.356907	0.377017	0.981608	0.87289	1.11361	-1.48757	1.05818e-32	down
PKN1	5585	8.03299	8.31225	8.57818	14.0062	13.7485	13.0817	-0.712354	1.0638e-32	down
IQGAP1	8826	89.5156	87.1363	85.0302	64.6787	61.8671	62.1859	0.471478	1.06618e-32	up
ADAM9	8754	4.41917	4.42989	4.48063	6.40562	6.43192	6.31552	-0.522933	1.14297e-32	down
SP2	6668	8.56219	8.9566	9.39887	4.36165	4.33988	4.277	1.05243	1.19829e-32	up
HOMER2	9455	2.39177	2.56804	2.50963	4.22531	4.07191	4.51997	-0.779007	1.23035e-32	down
PTPRE	5791	0.822102	0.88081	0.785726	1.91277	2.04337	1.91347	-1.23791	1.35402e-32	down
USP1	7398	55.8207	56.3006	55.3171	37.9066	37.3853	39.3529	0.54646	1.44852e-32	up
PDK1	5163,5170	0.724778	0.599772	0.671219	1.75889	1.48301	1.65091	-1.29372	1.52e-32	down
DMAP1	55929	13.4332	12.9151	14.0701	8.20596	7.9016	8.22004	0.732417	1.62545e-32	up
AP5M1	55745	6.30664	6.29517	6.21644	3.96308	3.81119	3.84607	0.69548	1.71104e-32	up
MKNK2	2872	12.9597	13.5868	13.8049	19.6083	21.2172	20.8557	-0.612208	1.84432e-32	down
CD68	968	3.79122	2.09462	3.70424	21.6705	23.3894	23.6168	-2.84021	1.97814e-32	down
DAB2IP	153090	14.0346	14.0654	14.167	9.70905	9.28174	9.35808	0.57624	2.23484e-32	up
RAB6A	5870	14.1405	15.0748	14.007	23.6744	22.1546	25.8397	-0.729566	2.54376e-32	down
LYPD3	27076	2.41346	2.72758	2.31704	6.97749	7.11065	6.46257	-1.46231	2.88029e-32	down
LRRFIP2	9209	5.14746	5.46777	5.22999	8.208	8.30104	8.00472	-0.629545	3.0396e-32	down
ZNF704	619279	0.426938	0.478877	0.548221	1.47497	1.18018	1.38222	-1.47335	3.56066e-32	down
CMPK1	51727	39.8523	40.2308	41.4891	57.2995	53.3577	56.0133	-0.455185	3.94853e-32	down
RRAGD	58528	0.765726	0.687614	0.649508	2.2614	2.42486	2.25704	-1.72327	3.96835e-32	down
DESI2	51029,27351	24.4246	25.8393	25.3618	16.4386	15.4416	16.3293	0.649562	4.08129e-32	up
DLG1	1739	10.0974	9.79991	10.1159	13.8557	13.2094	14.0369	-0.453611	4.20099e-32	down
DENND11	57189	7.92535	7.78968	8.56682	12.2801	12.2679	12.9328	-0.626274	4.47502e-32	down
SLC35A5	55032	14.5489	13.9193	14.338	8.20777	7.60821	8.58503	0.810878	4.52268e-32	up
KARS1	3735	32.5631	34.9827	34.1911	47.5295	52.0033	49.2293	-0.548165	4.99643e-32	down
SOCS3	9021	7.96739	9.5275	9.21925	16.6695	18.1706	17.0204	-0.957032	5.06517e-32	down
TLR3	7098	4.81945	4.87101	4.69132	2.44567	2.45311	2.41923	0.974716	5.46623e-32	up
TRIM29	23650	44.3398	44.6795	44.2795	31.4308	32.1945	32.8253	0.466802	5.74308e-32	up
SENP6	26054	9.8221	10.0801	10.2284	6.47454	5.6659	6.17024	0.718543	5.96631e-32	up
HERC5	51191	9.88318	9.26935	9.13962	16.1373	17.5611	15.0316	-0.784412	6.0589e-32	down
ERMAP	114625	3.96747	3.53358	4.10027	1.56468	1.62351	1.53137	1.29756	6.46703e-32	up
ZC3H14	79882	11.3949	11.2683	11.3388	7.85181	8.19048	7.89843	0.506157	6.63239e-32	up
ITGA5	3678	3.92532	5.16989	4.76698	9.10952	8.9542	9.52049	-0.992688	8.38172e-32	down
PI4K2A	55361	14.2849	14.5368	14.5696	23.2521	22.966	21.0454	-0.632419	9.02307e-32	down
KLF13	51621	6.27673	6.14268	7.1912	10.4595	10.2843	10.9668	-0.693329	1.44543e-31	down
PCDH10	57575	0.639716	0.540655	0.577479	0.0899708	0.081684	0.093422	2.72933	1.45451e-31	up
ZDHHC11	79844	0.830388	0.858066	0.865759	2.41391	2.21148	2.13602	-1.40444	1.54525e-31	down
CPLANE1	65250	3.82536	3.66901	3.70578	2.17397	1.69284	1.85882	0.968011	1.65968e-31	up
PALM2AKAP2	445815	1.04781	0.993935	1.13022	1.91711	2.07556	2.04015	-0.927455	1.77241e-31	down
TMBIM1	64114	10.3024	11.0843	10.6799	17.0223	16.3271	16.4394	-0.634745	2.03634e-31	down
GALNT12	79695	6.44134	6.16731	6.11921	11.4025	11.437	12.3923	-0.91169	2.06161e-31	down
LAMB2	3913,3915,84823	14.4259	13.841	14.4913	21.0419	19.6038	20.7353	-0.521595	2.23803e-31	down
KIF18A	81930	12.1307	11.5458	11.0996	6.33926	5.14546	5.45301	1.03786	2.30118e-31	up
PVT1	5820	0.710589	0.813774	0.885073	1.76658	1.53364	1.68165	-1.04799	2.37785e-31	down
CRK	1398	28.412	28.0409	28.9712	19.0507	18.8671	19.1131	0.582901	2.53084e-31	up
PRPF6	24148	34.1478	33.2126	35.3444	21.0877	22.1463	22.3889	0.646231	3.01613e-31	up
IFI35	3430	23.6718	22.2108	22.6195	10.6389	11.3838	12.4728	0.989739	3.55909e-31	up
STARD5	80765	5.38083	5.55382	5.64538	2.69305	2.79918	2.36144	1.07801	3.60776e-31	up
CHST11	50515	6.3028	6.59141	7.48583	11.8384	11.0726	11.584	-0.759229	3.81387e-31	down
GABRP	2568	2.20576	1.46301	1.33814	0.228006	0.241561	0.217959	2.86443	5.26541e-31	up
S100A16	140576,388697	80.6919	80.5227	80.3515	110.592	126.175	119.503	-0.560551	5.56614e-31	down
MPDZ	8777,84708	11.002	10.2158	10.801	7.04314	6.40615	6.79655	0.661296	6.23343e-31	up
MCM5	4174	22.5911	22.2785	23.8861	14.1615	13.9919	15.6407	0.650742	6.8093e-31	up
AGR2	10551	3.78243	3.72054	2.9334	0.740634	0.60954	0.816361	2.26816	7.14161e-31	up
SCEL	8796	1.59295	1.68097	1.72904	4.6505	4.55678	3.8476	-1.38373	7.36555e-31	down
MEAK7	57707	7.0856	7.32352	7.57218	10.9731	11.1639	10.7434	-0.580952	7.53371e-31	down
RABEP1	9135	14.6271	13.3735	13.8597	8.56797	8.85259	8.78491	0.675713	7.80478e-31	up
MTURN	222166	0.946742	1.17251	0.914488	3.07858	2.79562	2.72786	-1.50358	7.86451e-31	down
DELE1	9812	11.0158	12.0855	11.6679	6.74332	6.84066	6.80518	0.77001	8.3335e-31	up
HMGA2	8091	0.655909	0.762915	0.719281	1.646	1.51595	1.70284	-1.18605	9.3071e-31	down
YARS1	8565	16.1208	16.3143	16.5819	21.5425	22.4207	22.8114	-0.446017	1.00728e-30	down
MTSS1	9788	1.56661	1.90997	1.44209	4.15648	3.68967	4.32872	-1.30756	1.13302e-30	down
PITX1	5307	14.535	13.4262	14.5002	21.5904	23.3548	22.1305	-0.659638	1.13944e-30	down
PAPOLA	10914	59.4603	58.4875	58.4986	44.9201	42.6176	43.4201	0.430129	1.38543e-30	up
KCTD2	23510	11.0012	11.7145	10.8355	6.43274	6.32727	6.31197	0.814911	1.39497e-30	up
LAMB3	3914	66.4534	68.2271	72.1137	92.9499	92.0345	100.138	-0.463385	1.41123e-30	down
MPHOSPH9	10198	10.2213	9.72819	10.2615	6.13252	4.96644	5.75245	0.842203	1.57967e-30	up
POLE3	54107	52.2872	57.3899	53.5686	32.5938	35.1669	34.19	0.679175	1.62134e-30	up
STOM	2040	49.7235	50.8931	51.2881	68.5291	66.8641	67.3355	-0.416384	1.72479e-30	down
PRDX2	7001	40.9682	40.7914	43.227	26.8449	26.1291	26.3345	0.656226	1.83418e-30	up
DDR1	780	35.1393	33.6098	35.2745	24.198	24.3153	25.49	0.491249	1.84657e-30	up
DDB2	1643	10.2416	11.2266	10.3588	16.6532	19.0772	17.6797	-0.746861	2.09932e-30	down
COL17A1	1308	34.1916	36.5515	37.1181	50.2685	48.5616	47.7532	-0.442545	2.34196e-30	down
HNRNPR	10236	39.1761	39.5066	40.9359	27.9641	29.3625	28.9889	0.47075	2.44672e-30	up
ACOT2	10965	43.9843	40.8307	44.9729	24.7329	27.5921	24.1144	0.763767	2.93449e-30	up
PSAT1	29968	136.666	143.437	137.155	91.5646	98.5997	95.3829	0.547209	3.02436e-30	up
RPL26	6154	139.561	146.934	153.681	213.371	246.132	206.372	-0.597174	3.71809e-30	down
ZNF629	23361	11.7265	11.1752	12.0254	7.06928	6.83433	7.26382	0.722502	4.19004e-30	up
FAM53C	51307	14.1753	14.7706	15.597	9.56103	9.60841	9.24664	0.648488	4.37435e-30	up
TOGARAM1	23116	5.22402	5.20015	5.24137	3.13674	2.97498	2.89027	0.799278	4.80887e-30	up
BEX3	27018	60.2775	66.4023	69.2672	36.4087	38.3893	33.7948	0.851535	4.93528e-30	up
DHX35	60625	8.84151	9.00839	8.96023	5.03288	5.02338	4.94753	0.837452	5.14533e-30	up
SNHG32	50854	24.4939	24.0608	27.9231	40.9388	42.5289	40.9603	-0.702197	5.15009e-30	down
PMAIP1	5366	6.13033	5.96501	5.72421	11.8028	13.341	12.1392	-1.06506	5.36494e-30	down
ENSG00000272405		0.687247	0.480957	0.353126	2.7641	2.65467	3.13135	-2.49061	5.50042e-30	down
PLCG2	5336	0.898274	0.862248	1.06276	1.94454	2.14969	1.83244	-1.06985	5.82349e-30	down
ARRDC4	91947	3.90702	4.14017	3.50444	7.57582	8.17557	8.43987	-1.06639	6.70024e-30	down
LIMK2	3985	14.5726	14.1863	14.57	9.04834	9.52308	9.06857	0.648571	6.9638e-30	up
IL36G	56300	11.3512	10.4659	12.0721	4.18683	3.99228	3.4987	1.53705	7.20619e-30	up
GABRR1	2569	1.22138	1.39119	1.66597	0.165682	0.0586145	0.0571831	3.92602	7.32563e-30	up
POLR3G	10622	4.28558	4.4139	4.40487	8.14286	7.96708	8.82501	-0.928123	7.36341e-30	down
TP53I11	9537	3.45461	3.57611	3.45988	6.29832	5.89901	5.91907	-0.788199	9.601e-30	down
TGFA	7039	5.56471	6.48665	6.28253	10.9104	11.1201	10.4875	-0.82673	9.67783e-30	down
FKBP5	2289	4.80031	4.75441	4.95053	2.6756	2.67434	2.8795	0.817709	1.03309e-29	up
LSS	4047,64327	5.95271	6.02821	6.46448	3.40768	3.45068	3.23742	0.869509	1.0859e-29	up
RHEB	6009,6008	20.1195	18.0252	20.3752	29.1378	31.4662	29.6013	-0.624284	1.15852e-29	down
ULBP2	80328	13.2745	13.6263	13.8869	26.0756	29.1551	24.6089	-0.968972	1.17865e-29	down
SLC29A1	2030	3.5268	3.89776	4.40184	7.71123	9.10961	8.27846	-1.08564	1.22105e-29	down
GNG12	55970	40.2176	40.57	38.3835	55.7818	53.3018	56.8044	-0.477174	1.22811e-29	down
TMEM250	90120	24.6152	25.2912	28.297	13.7153	14.7817	15.784	0.820546	1.3112e-29	up
MEPCE	56257	24.8699	24.5358	25.1284	14.5923	16.0194	15.4526	0.694249	1.34137e-29	up
OAS2	4939	16.7495	18.3544	16.3515	10.7486	11.0897	10.9528	0.65002	1.37176e-29	up
HNRNPA2B1	3181	128.119	119.753	129.35	93.0044	90.7586	95.3182	0.434729	1.38255e-29	up
TET2	54790	2.99693	2.98594	2.96566	1.48479	1.72552	1.50923	0.923006	1.5987e-29	up
RPL18A	6142	65.1587	63.8333	69.8415	89.6354	98.862	90.4137	-0.488244	1.81683e-29	down
ANK3	288	2.26426	2.22708	2.2155	1.302	1.1579	1.29835	0.835574	1.82508e-29	up
ZDHHC16	84287	13.9412	13.6981	13.5942	7.58322	6.27816	6.7018	1.00376	1.84493e-29	up
YOD1	55432	9.13801	8.58933	9.27987	15.5036	13.3305	15.7964	-0.724682	1.91045e-29	down
ADNP	23394	19.2506	19.2797	19.7927	13.8291	13.1303	13.5039	0.527451	2.03567e-29	up
PEBP1	5037	93.6616	91.5212	100.022	56.6197	64.0013	56.2234	0.689518	2.14197e-29	up
KIFC2	90990	1.19122	0.872032	1.32667	3.63895	3.40911	3.55638	-1.64535	2.26436e-29	down
TBC1D5	9779	6.53878	6.83973	6.26221	10.0389	9.7209	10.6325	-0.629861	2.27267e-29	down
AP2B1	163	62.6884	62.9899	64.6019	80.7339	78.1435	80.3429	-0.330215	2.45802e-29	down
DNAH3	55567	0.596893	0.536078	0.549193	0.0894672	0.139193	0.0941341	2.38163	2.46866e-29	up
ENSG00000237550		268.392	272.844	306.592	401.327	442.062	400.699	-0.553245	2.47776e-29	down
JAG1	182	5.92224	5.47264	5.98444	8.98179	8.56956	8.87677	-0.604702	2.49782e-29	down
RAB5A	5868	16.8794	16.3504	16.4086	25.3196	26.368	23.777	-0.604347	2.62629e-29	down
USP40	55230	10.2735	10.4073	10.3152	6.25248	6.0014	6.75864	0.705131	2.78121e-29	up
SHOX2	6474	0.746325	0.719295	0.721963	2.20178	2.13933	2.36699	-1.61657	3.33114e-29	down
SKA2	348235	37.8344	40.1034	39.4079	24.2175	25.6249	26.0413	0.628905	3.66437e-29	up
RPL18	6141	54.1688	52.0878	56.2165	71.8689	80.9697	76.4133	-0.496732	3.76056e-29	down
SARM1	23098	0.542507	0.402118	0.43722	1.56399	1.53026	1.23675	-1.6481	3.93433e-29	down
GTF2F1	2962	59.2622	57.9703	60.4032	38.9004	40.7907	41.7289	0.548915	4.0122e-29	up
IFI27	3429	185.047	173.884	199.074	120.751	132.998	117.754	0.586907	4.03885e-29	up
MLPH	79083	2.08864	1.96314	2.41497	4.60864	4.26656	4.22366	-1.01833	4.16181e-29	down
MAP3K11	4296	18.8501	17.7982	19.2972	11.9953	12.887	12.8892	0.566728	4.4697e-29	up
RHOA	387	46.3846	49.5939	51.3584	65.4853	70.6435	68.865	-0.476462	4.85348e-29	down
TRABD	80305	30.6639	30.9885	32.4647	46.76	47.8852	42.8673	-0.547035	4.86342e-29	down
PLXND1	23129	0.810673	0.827444	0.662246	1.95541	1.9305	2.26462	-1.41885	5.78029e-29	down
FOXK1	221937	2.87695	3.21543	3.32891	5.71975	5.00322	5.79688	-0.810204	6.21369e-29	down
KNL1	57082	10.3165	9.92344	10.2047	6.11923	4.69774	5.54608	0.895745	6.36717e-29	up
MGLL	11343	0.212601	0.251895	0.296784	0.969925	0.887851	0.887416	-1.85041	6.91226e-29	down
NMI	9111,4641	16.5999	18.278	17.4843	10.3199	9.76015	9.56756	0.820609	6.98501e-29	up
SPG7	6687	2.74167	2.71836	2.94849	1.83153	1.84123	1.78764	0.622843	7.14931e-29	up
MBNL2	10150	13.9317	13.9034	12.476	22.8586	20.4025	23.3617	-0.724842	8.0887e-29	down
HELZ2	85441	10.2255	10.8128	11.1153	7.07935	7.2229	7.07134	0.589152	8.18392e-29	up
MPPED2	744	1.11382	1.14546	1.37451	0.32869	0.279511	0.324706	1.96167	8.76995e-29	up
CAP1	10487,5652,7187	100.499	102.311	104.237	131.362	134.13	127.373	-0.355568	9.34847e-29	down
ITCH	83737	12.1781	12.5723	12.6532	16.5081	18.0597	17.9728	-0.490257	1.02637e-28	down
RAB10	10890	35.0682	35.8255	35.0454	47.5903	49.1901	47.6035	-0.446675	1.06046e-28	down
FGD3	89846,619477	2.85451	2.55879	3.09099	1.1016	1.01074	0.940312	1.47813	1.10658e-28	up
HNRNPM	4670	52.573	49.0823	51.9005	35.9206	36.3246	37.3509	0.486566	1.22137e-28	up
SNRNP70	6625	56.3647	53.4663	55.8342	39.7572	40.4647	39.6877	0.466325	1.25877e-28	up
KIAA1522	57648	40.5581	42.909	43.0491	29.5657	29.5483	30.2896	0.500918	1.28446e-28	up
SPRY4	81848	0.149247	0.180773	0.149802	1.04034	0.79054	0.96623	-2.54336	1.31863e-28	down
SPOCK1	6695	0.667806	0.791474	0.655287	2.42854	1.92779	2.67647	-1.73374	1.36467e-28	down
IFIT3	3437	39.6075	36.0241	37.1615	24.8532	26.0717	24.5225	0.580135	1.36734e-28	up
NYNRIN	57523	1.24511	1.54189	1.41167	0.346797	0.416659	0.317159	1.95808	1.37071e-28	up
CCL22	6367	0.59828	0.476938	0.609712	2.3849	2.45212	2.79842	-2.18002	1.40835e-28	down
EEF1G	1937	245.257	254.201	256.245	334.954	379.132	335.535	-0.473978	1.4222e-28	down
HMGCS1	3157	16.6161	15.7783	15.9056	22.9355	21.869	22.6907	-0.482761	1.42972e-28	down
PIEZO1	9780	13.0698	12.4014	13.2496	8.57461	8.27845	8.96588	0.584682	1.48686e-28	up
PEX13	5194	5.7298	5.4714	5.96299	9.04657	9.14921	9.38457	-0.684239	1.52908e-28	down
PLXNA2	5362	3.02088	2.9989	3.01954	5.32305	4.57825	5.36925	-0.756464	1.71012e-28	down
VAPA	9218	15.4701	15.5209	15.6572	20.184	20.3199	20.0608	-0.376652	1.87028e-28	down
EXTL2	2135	8.26338	7.23336	8.19527	3.67038	3.80028	3.98106	1.04884	1.91392e-28	up
GOT2	2806	60.3644	62.5896	63.1204	79.7219	81.3362	81.7546	-0.383964	1.97735e-28	down
ANKRD10	55608	34.6874	33.7372	36.3354	51.1903	46.367	48.1303	-0.475791	2.52015e-28	down
ZNF780A	284323	5.82079	5.93798	5.5663	3.26263	3.21711	2.99609	0.870536	2.54051e-28	up
ARHGAP35	2909	8.41544	8.16336	8.76966	5.45797	5.07066	5.75549	0.638433	2.54985e-28	up
HR	55806	1.30101	1.30459	1.29317	2.81222	2.63411	2.73886	-1.07	2.60865e-28	down
PCSK9	255738	8.57324	8.47863	8.66383	5.08494	4.37308	4.52512	0.87896	2.81652e-28	up
CCDC88A	55704	2.23251	2.0502	2.34669	1.21755	1.01118	1.25472	0.92836	2.83087e-28	up
ARL4D	379	8.05815	8.00461	8.59306	16.0471	18.5001	16.3099	-1.04452	3.18853e-28	down
UFM1	51569	12.1578	11.9032	12.4648	19.0089	17.5267	19.1096	-0.607342	3.19748e-28	down
TMC7	79905	1.53655	1.62529	1.6724	3.38373	3.61863	3.68745	-1.14488	3.25571e-28	down
MRPS12	6183,65993	23.5754	24.7799	27.5611	12.9737	13.9322	12.9455	0.929781	3.31171e-28	up
CDKN2C	1031	10.9206	9.88076	10.463	5.20701	5.22232	5.35239	0.986263	3.35578e-28	up
DDIT3	1649	6.42016	5.98698	5.47148	14.9864	15.2772	13.3117	-1.28527	3.66798e-28	down
CAPN2	824	31.4031	31.4348	32.0214	39.9825	40.045	41.0783	-0.352406	4.12505e-28	down
POLDIP2	26073	52.7743	51.5379	54.395	36.1433	37.343	35.2374	0.545702	4.90218e-28	up
SERPINB13	5275	11.2729	11.029	12.0451	17.841	16.8125	17.2534	-0.595744	5.4709e-28	down
SPX	80763	0.119011	0.231812	0.215463	0.969155	1.15351	1.24407	-2.57175	6.06345e-28	down
ASNS	440	43.673	46.6561	47.0227	61.2786	60.5445	60.5912	-0.409343	6.3228e-28	down
UBE2G2	7327	11.5743	11.9326	11.8361	17.7812	16.2225	17.0945	-0.531851	6.80926e-28	down
SLC15A3	51296	2.9353	2.91331	3.16649	1.37638	1.2768	1.18363	1.23244	7.05422e-28	up
DNAJC13	23317	21.3896	20.726	20.6584	14.354	12.5028	13.9268	0.622182	7.10304e-28	up
PTTG1IP	754	46.4531	48.187	47.7978	64.1091	65.5755	61.7681	-0.426654	7.48449e-28	down
SLCO4C1	353189	2.3674	2.92497	2.99533	0.680674	0.926867	0.795723	1.78598	8.54859e-28	up
SYK	6850	14.4788	13.9619	14.1681	9.1799	8.55627	8.23121	0.714448	9.54057e-28	up
SF1	7536,2516	35.3139	35.4805	35.9635	25.6897	24.2426	25.6204	0.498787	1.02205e-27	up
MRPL16	54948	32.4778	31.2056	31.5851	18.6246	20.2881	18.5517	0.729331	1.05915e-27	up
POLG	5428	24.8166	23.8812	27.3437	16.9329	15.4312	16.8738	0.627021	1.12127e-27	up
RNF20	56254	17.0171	17.6846	17.0637	10.3714	11.1617	10.7131	0.682861	1.14644e-27	up
RNF170	81790	5.89288	6.1157	5.75695	3.23599	2.98703	3.00815	0.944495	1.17102e-27	up
KYAT3	56267	39.0582	37.4728	40.82	24.0208	25.2104	25.3657	0.653644	1.20592e-27	up
PPP2R2C	5522	0.12864	0.110421	0.173723	0.707328	0.68772	0.731967	-2.36537	1.23517e-27	down
CSNK2A2	1459	6.98423	6.60753	6.72184	10.4653	9.50783	10.3663	-0.578748	1.31112e-27	down
EXOC3L4	91828	2.51744	2.12348	2.48494	0.444811	0.635282	0.581385	2.1006	1.36742e-27	up
SMARCA1	6594	6.62947	5.82499	6.4205	2.47143	2.28856	2.99943	1.28245	1.45084e-27	up
SERP1	27230	19.7952	18.584	19.6597	25.932	27.0398	27.1631	-0.465409	1.51408e-27	down
FAM120C	54954	4.53594	4.75646	4.59164	2.48131	2.49636	2.62585	0.868689	1.76825e-27	up
SLC47A2	146802	8.24471	7.16304	8.39328	4.12854	4.38924	4.46124	0.874843	1.93323e-27	up
PAXBP1	94104	4.33423	4.22665	4.3077	7.39655	6.66665	7.37395	-0.73626	2.18041e-27	down
GAS8	2622	5.0255	4.84695	5.07959	2.50637	2.09526	1.96282	1.1876	2.22004e-27	up
LIFR	3977	2.5625	2.49763	2.32068	4.68932	3.99591	4.59067	-0.846957	2.24856e-27	down
TAPBPL	55080	10.5733	9.79772	12.0715	5.14951	5.30072	5.3454	1.03836	2.29141e-27	up
RFX7	64864	4.9758	4.94604	4.93464	2.57329	2.22419	2.84487	0.959003	2.44108e-27	up
THBD	7056	0.753331	0.961048	0.850703	2.92929	2.64974	2.64463	-1.68078	2.53386e-27	down
SUN1	23353	10.3595	9.86719	10.4927	14.6198	13.6149	13.9774	-0.45851	2.57026e-27	down
VPS35L	57020	1.74164	1.62481	1.33444	0.538551	0.523107	0.473793	1.61427	2.59854e-27	up
POGLUT1	56983	5.1235	5.06045	4.87791	2.67222	2.70792	2.68585	0.900977	2.60723e-27	up
KDM2A	22992	27.6035	27.0844	27.6431	20.05	19.9094	20.6002	0.443082	2.61029e-27	up
CGAS	115004	6.45834	6.83494	7.51529	11.9462	11.5703	11.7277	-0.76021	2.77402e-27	down
PLAUR	5329	0.909405	0.981667	0.898063	2.51671	2.83382	2.68711	-1.52695	2.84449e-27	down
MVK	4598	3.74415	3.72508	3.71552	1.86195	2.01999	1.97931	0.932253	3.03218e-27	up
UBC	7316,6233	278.245	275.291	280.361	392.17	442.054	363.685	-0.522578	3.21938e-27	down
PIGQ	9091	3.97662	4.11944	4.72375	2.10274	2.17018	2.04452	1.02096	3.31834e-27	up
ENTPD2	954	0.264782	0.305678	0.389875	1.78346	2.11065	2.2506	-2.67774	3.36507e-27	down
RPL28	6158	43.941	44.837	47.5816	58.3528	61.8303	59.3781	-0.397059	3.45201e-27	down
PPIP5K2	23262	3.73075	3.52479	3.94704	2.20986	1.90562	2.18262	0.830839	3.50086e-27	up
NELFCD	51497	19.9389	19.6116	20.5201	13.4332	14.0652	13.6445	0.546013	3.63394e-27	up
PSME1	5720	135.542	128.69	135.28	89.4897	97.0154	87.6505	0.543245	3.92789e-27	up
MT-CO3		9748.58	9931.15	9522.94	6387.11	6308.68	7244.45	0.550417	4.05132e-27	up
STXBP1	6812	1.47109	1.66589	1.38843	3.23295	3.00583	3.63389	-1.12539	4.30842e-27	down
HNRNPU	3192	47.9284	47.068	48.3745	36.3176	34.0957	36.6216	0.421671	4.66571e-27	up
PDLIM7	9260	8.25219	7.36467	8.23826	13.1598	13.3897	12.4173	-0.707945	5.21625e-27	down
FAM20C	56975	0.516156	0.788194	0.747895	2.20048	2.61535	2.53825	-1.84134	5.69047e-27	down
CREBBP	1387	7.53283	8.10665	8.05678	5.05253	4.47665	5.11073	0.694752	5.74742e-27	up
SH3BP2	6452	2.83845	2.90097	3.02615	5.0174	4.47305	4.53708	-0.678342	5.87197e-27	down
ZMYM4	9202	13.6045	12.4613	13.0616	8.76788	8.21792	8.29455	0.63016	6.82647e-27	up
PFKM	5213	9.25244	8.96861	10.0572	14.127	13.9173	13.4237	-0.552301	6.93321e-27	down
IRAK2	3656	1.04534	1.25874	1.38717	3.61577	3.49665	3.91851	-1.57937	7.33582e-27	down
USF2	7392	20.942	22.8886	23.0074	13.9009	14.7592	14.1063	0.644191	7.50022e-27	up
DHX8	1659	14.0152	13.3443	13.209	9.23166	9.30098	9.17785	0.549927	7.62787e-27	up
TOR1A	1861	20.3376	21.1106	19.3027	10.7799	12.5138	10.3483	0.852644	7.64701e-27	up
MORF4L2	9643	62.3841	64.5257	68.0106	89.1924	92.5301	85.1983	-0.453527	7.99535e-27	down
LAMC1	3915	26.203	26.8863	27.1919	34.3895	34.1403	34.2067	-0.355815	8.01773e-27	down
PARVA	55742	3.48812	3.26875	3.51274	1.88638	1.91523	1.98945	0.826483	9.09726e-27	up
CLDN12	9069	9.09642	8.69436	8.86416	13.2983	12.9195	12.5846	-0.541741	9.30785e-27	down
UPF3A	65110	18.3353	17.6616	19.4471	12.4659	12.2732	12.0137	0.593175	9.33103e-27	up
MRFAP1L1	114932	32.7234	31.2535	31.5468	19.7757	20.168	18.3799	0.711778	9.73734e-27	up
TPD52	7163	7.60235	7.91591	7.64599	11.2334	11.0812	11.2113	-0.533372	9.99335e-27	down
ZFYVE9	9372	9.85517	9.47698	9.84454	5.95623	6.38044	5.68858	0.694797	1.03682e-26	up
LINC00963	100506190	1.56862	1.58421	1.62541	3.0359	2.67222	2.7465	-0.82326	1.05812e-26	down
DBT	1629	8.4324	7.91425	8.21043	5.25733	4.53801	5.11694	0.719638	1.07751e-26	up
ZBED3	84327	4.57681	4.95937	4.92988	2.5215	2.44264	2.47619	0.959232	1.08427e-26	up
IDI1	3422	22.1004	20.3922	21.617	13.9948	13.8164	14.0467	0.615039	1.14685e-26	up
NGRN	51335	101.768	105.159	103.308	72.892	77.2741	73.0416	0.474978	1.25739e-26	up
NECTIN1	5818	35.4961	34.9743	36.6647	26.0397	24.8165	26.4984	0.469868	1.27955e-26	up
TRIM16L	147166	20.2624	20.8143	21.7699	13.4001	14.0461	13.2632	0.626474	1.30373e-26	up
AP3S2	10239	15.089	16.4406	15.3567	9.67711	9.93226	10.5484	0.636636	1.31152e-26	up
ADH1C	126	7.95504	7.2294	6.55543	1.99938	2.39768	1.96192	1.77347	1.35064e-26	up
SDCBP	6386	47.7085	47.8713	48.0302	60.7224	60.9926	60.7535	-0.34549	1.54279e-26	down
LPAR3	23566	1.5511	1.13792	1.16493	3.54863	4.18397	4.30327	-1.64293	1.62921e-26	down
ADD3	120	10.0413	9.62672	9.88365	6.10884	6.14445	6.26189	0.674531	1.64737e-26	up
H2BC5	3017	39.3656	41.3296	46.8777	19.1754	21.9316	17.1522	1.13076	1.75119e-26	up
ABCA12	26154	1.7867	1.59941	1.65597	3.52516	2.98908	3.51069	-0.9915	1.76307e-26	down
TMEM68	137695	4.13853	4.5928	4.17824	7.0891	7.40746	7.53678	-0.771248	1.77012e-26	down
VGLL4	9686	4.76537	5.35355	5.14189	8.39636	8.05268	8.21398	-0.692519	1.83595e-26	down
ENSG00000261578		0.747546	0.932589	0.859915	2.55231	2.8243	2.51436	-1.63535	1.85214e-26	down
MAPK8IP3	23162	8.10541	7.89554	8.48612	12.8771	11.8295	11.2248	-0.553223	1.8532e-26	down
MED11	400569	11.6246	11.7135	10.3228	4.049	4.60581	4.08052	1.40224	1.89325e-26	up
PKP1	5317	17.7355	17.9643	18.0988	11.9283	9.9084	10.799	0.721117	1.91206e-26	up
ADGRE1	2015	1.1777	1.13437	1.18213	0.172815	0.105189	0.113486	3.15792	1.93401e-26	up
SERPINF1	5176	6.12028	6.10706	5.89755	2.65914	2.5481	2.31789	1.26818	2.18733e-26	up
GGT6	124975	9.00853	9.1677	9.20499	4.55683	4.87344	4.48997	0.976002	2.93375e-26	up
ADGRF4	221393	2.26177	2.34318	2.75318	5.872	6.08634	5.26949	-1.22733	2.93505e-26	down
GLYR1	84656	29.1278	32.6605	31.6322	17.791	20.7663	19.1085	0.696024	3.24316e-26	up
AARS2	57505	5.81002	6.02472	5.83871	2.64144	2.76794	3.14032	1.04764	3.38595e-26	up
RAP2B	5912	10.3558	10.8336	10.0178	14.964	14.6628	15.3232	-0.526439	3.89095e-26	down
MAP3K9	4293	2.61246	2.6308	2.49153	4.37614	4.05534	4.13906	-0.700613	4.34642e-26	down
MALL	7851	1.35193	1.17105	1.03981	3.80462	3.81256	4.03007	-1.70891	4.53317e-26	down
H2AZ2	94239	28.9891	26.9002	30.1761	19.3431	18.4411	20.19	0.570024	4.57447e-26	up
MMP15	4324	8.74614	9.9087	9.45359	14.7276	15.677	14.9564	-0.690448	4.67928e-26	down
FLII	2314	32.475	31.954	33.194	41.9588	41.2119	41.0711	-0.347856	4.92844e-26	down
ZNF710	374655	10.8631	10.5162	10.963	5.07567	4.96822	6.32083	0.982836	5.07404e-26	up
SAXO1	158297	0.768632	0.769899	0.808561	0.198606	0.185233	0.16338	2.10068	5.13636e-26	up
WNK4	65266	1.04146	0.83694	0.904335	2.55161	2.64151	2.39257	-1.44678	5.22919e-26	down
PTGS1	5742	12.2125	12.9419	12.9708	17.7626	18.6053	18.1234	-0.515278	5.27961e-26	down
SGTB	54557	1.49658	1.79804	1.64447	4.22625	3.4099	4.01711	-1.23842	5.37887e-26	down
RPS20	6224	62.8749	62.9133	64.1987	84.7046	95.1412	82.366	-0.464832	5.89088e-26	down
KIAA1549L	25758	0.088218	0.154129	0.0534838	0.718406	0.641405	0.699666	-2.79943	5.96843e-26	down
CILK1	22858	4.27388	4.89015	4.23864	1.9938	2.14893	2.10473	1.10118	5.97829e-26	up
CDYL2	124359	0.391485	0.415509	0.434004	1.28689	1.1661	1.17173	-1.54637	6.03887e-26	down
WARS2	10352	8.65729	8.44923	8.58427	4.46665	4.60945	4.71804	0.897195	6.21712e-26	up
KLF7	8609	4.88232	4.93217	5.0799	7.77398	7.16839	7.84499	-0.613465	6.29273e-26	down
GARS1	2617	11.0924	10.9347	10.5904	15.1126	15.6163	14.1125	-0.459189	6.30712e-26	down
TAF15	8148	27.2362	23.9358	29.3226	16.749	15.5813	17.9473	0.678976	6.32502e-26	up
OXCT1	5019	13.2428	13.0161	13.4055	19.0523	18.8694	19.2853	-0.528349	6.32798e-26	down
AKAP6	9472	0.711606	0.645962	0.607393	0.227108	0.234622	0.205404	1.55845	6.68293e-26	up
ERI2	112479	7.82059	8.64627	8.76997	4.52773	4.8168	5.01082	0.813943	6.99135e-26	up
ZMYND11	10771	14.775	15.656	15.1648	9.8176	9.22556	9.79028	0.661156	8.81725e-26	up
IPO9	55705	15.1998	14.3686	14.4198	10.3207	9.97488	10.3884	0.51963	9.18054e-26	up
TMBIM4	51643	5.70931	5.23109	5.69554	2.50868	2.64625	2.63353	1.09489	9.51206e-26	up
LPCAT4	254531,129642	6.45643	7.02394	7.49528	12.0572	12.2092	11.0141	-0.750151	1.10535e-25	down
SOD2	6648,100129518	11.0047	11.7002	12.1352	15.4164	15.5084	16.4655	-0.443841	1.13171e-25	down
PPP1R13L	10848	13.4365	14.1034	13.9866	19.7436	19.5136	19.4414	-0.499298	1.14508e-25	down
GNAO1	2775	1.74077	1.93432	1.73632	3.21719	2.9963	3.44127	-0.835235	1.17998e-25	down
RPS18	6222,100131863	235.366	237.54	247.641	325.378	369.742	315.573	-0.48818	1.21286e-25	down
HK1	3098,51361,3739,255061	12.6639	14.4213	15.0295	20.885	21.0402	21.5948	-0.592885	1.22215e-25	down
LY6D	8581	6.8511	6.32944	6.77672	1.51634	2.08491	1.91287	1.85571	1.22567e-25	up
MUC20	200958	8.50609	9.1114	9.14502	5.37724	5.09126	5.54774	0.740678	1.26676e-25	up
PKD1	5310	3.26335	3.06607	3.57297	4.91201	5.01164	4.89819	-0.581876	1.35302e-25	down
PDLIM5	10611	6.47458	6.42401	6.8343	10.4413	9.11008	9.86556	-0.576044	1.36423e-25	down
C5orf15	56951	64.419	65.1398	62.337	44.3828	44.8107	43.395	0.533368	1.39823e-25	up
NACA	4666	32.5052	32.558	34.4089	43.0737	44.7661	41.1656	-0.375066	1.54789e-25	down
MLLT1	4298	16.818	18.8642	18.6229	10.8324	11.3154	11.403	0.694741	1.54818e-25	up
NTN4	59277,8079	7.47352	7.92898	6.97516	13.0244	12.0593	12.5163	-0.748672	1.58788e-25	down
ANKRD26	22852	1.56422	1.4172	1.47407	0.578694	0.502104	0.669275	1.34817	1.61417e-25	up
ANXA10	11199	0.521833	0.381411	0.436295	2.76502	2.88788	2.4289	-2.59294	1.6206e-25	down
SNHG1	23642	18.5182	18.8195	19.2557	28.436	30.4596	26.1605	-0.587781	1.66258e-25	down
COQ2	27235	6.59105	6.62677	7.78326	2.97457	2.95629	3.0311	1.22858	1.80547e-25	up
EEF1A1	1915	1104.43	1055.46	1097.76	1318.88	1381.75	1306.03	-0.298566	2.06272e-25	down
RIMS3	9783	1.33716	1.34918	1.57267	2.97271	2.9171	3.01153	-1.06351	2.13103e-25	down
TMPRSS4	56649	4.29939	4.19177	4.07718	6.39703	7.08742	6.40249	-0.662026	2.23074e-25	down
LTA4H	4048	15.351	14.323	14.985	21.0455	20.4513	19.7075	-0.454678	2.28344e-25	down
ATP13A3	79572	7.98147	7.77492	8.03789	11.343	10.2124	11.6096	-0.479044	2.35471e-25	down
CGNL1	84952	0.162095	0.159031	0.0963606	0.696238	0.96083	0.73803	-2.52028	2.59727e-25	down
SPTLC2	9517	12.1442	11.2966	12.5692	8.04263	7.25856	8.12222	0.620447	2.69097e-25	up
SPINT1	6692	34.0294	36.1351	36.2335	47.319	48.686	50.8431	-0.464854	3.32871e-25	down
SEC24A	10802	5.30063	5.14167	5.30202	8.9021	7.74974	8.7862	-0.692156	3.53086e-25	down
ALDOA	226,112694756	217.718	214.291	202.068	267.952	286.603	287.1	-0.408571	3.58978e-25	down
PDCD4	27250	9.95587	8.8025	9.55876	15.1672	14.4771	14.3003	-0.634008	3.61726e-25	down
PHLDA2	7262	14.158	12.0445	14.4224	26.2503	29.7594	27.4914	-1.03943	3.64774e-25	down
TFCP2L1	29842	0.476284	0.372285	0.550406	1.47303	1.36656	1.34148	-1.5795	3.68694e-25	down
FBXO45	200933	3.7197	3.89334	4.08896	6.39766	6.57617	6.83978	-0.759737	4.46061e-25	down
MBD3	53615,64180	7.71873	7.72907	7.58315	3.88537	4.70186	3.74747	0.900851	5.11867e-25	up
NIBAN1	116496	13.1536	13.3493	12.8632	18.4649	17.394	18.2817	-0.45976	5.16606e-25	down
NLRX1	79671	8.50915	8.4948	9.17482	4.61231	5.08104	5.12809	0.820712	5.25039e-25	up
ANKRD33B	651746	1.88995	1.88358	1.82266	3.39584	3.15173	3.29282	-0.814268	5.61171e-25	down
EIF4B	1975	68.7405	69.6041	71.094	85.9747	90.7167	86.7757	-0.331096	5.8946e-25	down
TTC9	23508	0.842277	0.933263	1.23075	2.96885	3.0645	2.67553	-1.5345	5.98988e-25	down
KNDC1	85442	0.0450164	0.0438266	0.0477342	0.221662	0.320724	0.219116	-2.47913	5.99522e-25	down
PRPF8	10594	33.6458	34.3986	35.6074	25.3114	23.644	25.7935	0.471622	6.09749e-25	up
ROGDI	79641	16.5973	16.9858	17.0083	10.4814	10.8299	9.98459	0.692917	6.69187e-25	up
MFSD14B	84641	22.6707	23.9198	22.3496	14.1689	14.5767	15.2506	0.647966	6.71287e-25	up
N4BP3	23138	0.365635	0.518625	0.545796	1.56048	1.75678	1.75821	-1.82747	6.999e-25	down
PSEN1	5663	8.64255	8.77847	8.73378	6.35969	6.49517	6.21398	0.455858	7.58737e-25	up
AKR1A1	10327	28.8416	27.0553	29.6911	39.186	44.3997	41.3163	-0.545317	9.70171e-25	down
SLC2A3	6515	0.317489	0.617325	0.439624	1.86384	1.91005	1.87145	-2.03822	9.78056e-25	down
FHOD3	80206,91010	0.499275	0.455291	0.506957	1.33965	1.38758	1.28998	-1.45872	1.0187e-24	down
KIF11	3832	34.0564	32.6368	31.9959	22.7293	21.6497	23.3508	0.543099	1.03723e-24	up
MTATP6P1	106480796	1230.33	1259.65	1086.37	801.897	764.238	818.113	0.584952	1.10697e-24	up
ZMIZ1	57178	6.61621	6.30354	6.67939	10.0508	9.01254	10.4198	-0.5891	1.12795e-24	down
GRAMD4	23151	22.7219	22.3024	24.8251	33.5675	31.1343	34.157	-0.501123	1.16659e-24	down
DEPDC1B	55789	21.0207	20.9559	22.3014	13.5577	14.4459	13.1142	0.644566	1.37713e-24	up
SHB	6461	2.20337	2.33832	2.20576	4.14961	4.21746	4.40253	-0.920298	1.3842e-24	down
NARF	26502,51444	4.09623	4.06036	4.08149	6.61282	7.13341	6.20253	-0.704922	1.50356e-24	down
EPHA2	1969	46.336	45.1905	46.846	58.6584	58.7122	61.4454	-0.369919	1.51777e-24	down
FOXA1	3169	18.0056	17.9475	16.5842	10.812	11.1264	10.9625	0.675211	1.59333e-24	up
GLO1	2739	79.5464	80.8691	80.8889	103.038	103.277	101.403	-0.350753	1.61569e-24	down
FAM149B1	317662	7.00641	6.83874	7.02798	4.42025	4.07375	4.10235	0.728643	1.78905e-24	up
PCNX4	64430	5.1762	5.00901	5.1182	3.25631	3.32206	3.57873	0.591366	1.83331e-24	up
LSM14A	26065	61.0865	57.4966	64.0002	43.6726	44.8211	42.551	0.478495	1.89561e-24	up
TRIB1	10221	4.26929	4.33068	3.72003	7.75599	7.63421	8.74324	-0.970031	1.96056e-24	down
FADS1	3992,4593	17.4828	17.1818	17.6644	12.8046	12.6082	12.835	0.452234	1.9945e-24	up
TBC1D22A-DT	119863861	9.01157	10.8642	9.57973	23.4928	29.6155	23.5842	-1.38055	2.06703e-24	down
AFAP1L2	84632	3.90785	4.49063	4.44328	7.49812	7.18876	7.25922	-0.773121	2.18723e-24	down
KCND1	3750	0.15094	0.189185	0.203123	0.973767	0.894544	0.849575	-2.3228	2.20689e-24	down
CCT5	22948	111.939	106.929	113.213	138.449	151.072	139.068	-0.368055	2.37642e-24	down
BAG3	9531	36.9489	37.2652	38.7883	51.8591	51.7699	57.8688	-0.515163	2.44815e-24	down
SETD5	55209	6.23914	6.24487	6.45102	8.4493	7.98058	8.31703	-0.38619	2.57441e-24	down
RRP7A	27341	18.1245	17.7246	18.1119	12.531	12.4871	12.2017	0.535847	2.57538e-24	up
CLIC1	1192	103.165	101.983	107.291	130.854	140.562	136.458	-0.384546	2.59181e-24	down
ELMO1	9844	1.45284	1.41858	1.37051	0.537598	0.59058	0.599063	1.29625	2.70788e-24	up
PDCD6IP	10015	21.3823	21.096	20.6238	27.7548	27.154	26.9259	-0.375023	2.75201e-24	down
PTPN1	5770	32.4061	30.736	31.9783	41.8387	41.1817	42.6518	-0.40184	2.75643e-24	down
MTND2P28	100652939	327.412	347.915	311.325	221.849	202.924	228.456	0.594953	2.83457e-24	up
RABEP2	79874	4.89682	5.36224	5.82013	2.57214	2.14097	2.43415	1.16973	2.84106e-24	up
CTR9	9646	14.6795	14.8265	14.3249	9.31902	9.75349	9.65197	0.609668	2.91779e-24	up
MT-TP		307.74	275.461	289.129	551.685	510.609	659.18	-0.980699	3.02765e-24	down
DSG2	1829	34.0885	35.5214	34.3018	43.6591	43.9412	44.5906	-0.347265	3.12077e-24	down
WNT7B	7477	22.3488	23.0447	22.2587	30.3209	30.1127	31.8869	-0.448514	3.13357e-24	down
GUCA1B	2979	0.406947	0.282419	0.30641	2.13441	1.92163	2.08406	-2.62437	3.21109e-24	down
DHX37	57647	8.59388	8.27459	8.00063	5.10345	4.99295	5.1241	0.708338	3.26295e-24	up
CLDND1	56650	25.0413	26.4574	25.8332	34.0187	34.643	34.1229	-0.41049	3.60688e-24	down
NPC1	4864,257641	6.64293	7.27761	6.93934	10.017	9.94699	10.4076	-0.54199	3.67178e-24	down
RAB15	376267	3.67421	4.12232	3.97199	1.64229	1.49916	1.81194	1.24845	4.37954e-24	up
NIPSNAP3A	25934	14.9833	14.4433	14.6788	6.46856	8.07337	7.75265	0.984262	4.47258e-24	up
HERC2P9	440248	4.93683	4.72047	5.12091	3.0429	2.90889	3.0341	0.717738	4.76234e-24	up
STX3	6809	2.21791	2.03967	2.11323	4.12303	4.17585	3.65473	-0.907895	5.15772e-24	down
C17orf80	55028	8.70969	8.86547	8.95186	5.18854	5.28707	5.13259	0.765158	5.22582e-24	up
TAGLN2	8407	138.465	140.478	148.256	180.012	194.545	181.588	-0.380554	5.35308e-24	down
CALML3-AS1	100132159	0.145544	0.100695	0.113901	0.725248	0.511883	0.7749	-2.48202	5.52179e-24	down
SCARB1	949	3.10785	2.89879	3.16183	4.63101	4.45138	4.49217	-0.566153	5.55016e-24	down
L1CAM	3897	0.450045	0.613509	0.680962	1.89836	1.60771	1.96032	-1.64776	5.62429e-24	down
CDC6	990	15.1859	14.9625	15.7418	21.2101	21.4795	20.3147	-0.457266	5.78804e-24	down
MIR23AHG	284454	0.506186	0.532059	0.656871	1.21774	1.21286	1.19235	-1.09578	5.79194e-24	down
ENOSF1	55556	6.81794	6.67764	7.65298	4.03839	4.52893	4.27539	0.71961	5.84123e-24	up
USP47	55031	9.42744	9.00503	8.89106	6.12104	5.04899	5.6608	0.699037	6.12456e-24	up
RING1	6015	27.3774	25.9092	28.2848	14.9139	14.4763	16.75	0.822041	6.6467e-24	up
EID3	493861	4.8901	5.21024	5.83352	0.768364	1.28059	1.2688	2.26382	6.66447e-24	up
RCBTB1	55213	5.69714	5.91079	6.4679	9.88282	9.65467	10.5245	-0.73388	7.48426e-24	down
PHETA2	150368	4.47135	4.57957	5.26584	1.31713	1.72809	1.56155	1.63588	7.89922e-24	up
NADSYN1	55191	2.16915	2.21578	2.25616	3.60749	3.85786	3.28293	-0.694613	8.2034e-24	down
HIRA	7290	9.84104	10.515	10.8198	5.17222	5.75475	6.08932	0.873513	8.33515e-24	up
CLK3	1198	2.66693	2.87222	2.91589	4.32664	4.17643	4.00612	-0.565104	8.73523e-24	down
TMC4	147798	21.0549	20.3384	20.7579	29.4776	28.7535	31.4141	-0.528444	9.16373e-24	down
ZC3H4	23211	7.95561	8.76638	9.13367	4.49425	4.42988	5.22724	0.869538	9.88421e-24	up
CRELD1	78987	1.53571	1.46834	1.88269	3.20359	3.52435	3.11407	-1.01008	9.98604e-24	down
FSTL1	11167	7.98566	7.88652	7.16284	4.61151	4.72784	4.55977	0.728835	1.00114e-23	up
ZNF146	7705	63.2019	64.8185	60.9325	46.1773	43.3259	44.6477	0.49417	1.01665e-23	up
FLI1	2313	0.297567	0.149817	0.147787	1.04908	0.962017	1.24846	-2.4533	1.03714e-23	down
INSR	3643	0.712899	0.701703	0.669021	1.78462	1.41931	1.81877	-1.26937	1.0641e-23	down
HRNR	388697	1.77956	1.65048	1.82587	0.472366	0.709623	0.632781	1.53415	1.08555e-23	up
SREK1	140890	19.2635	17.7241	18.2884	12.4203	10.3178	12.4791	0.650371	1.28715e-23	up
ALDH1L2	160428	1.22122	1.20474	1.34481	2.40743	2.42843	2.38138	-0.936589	1.30893e-23	down
CPT2	1376	7.8985	8.39078	8.00639	5.33633	5.20513	4.80333	0.662951	1.3352e-23	up
NAA40	79829	5.4853	5.85304	6.41226	3.15992	3.08295	3.05808	0.932418	1.58392e-23	up
CDK13	8621	3.78679	3.79036	3.87366	2.64163	2.45729	2.60466	0.57185	1.67325e-23	up
SLC44A1	23446	12.965	12.562	12.4436	9.12583	8.6128	8.9912	0.506429	1.77358e-23	up
MIRLET7BHG	400931	2.8797	2.9389	3.231	6.30295	7.08445	5.11763	-1.03199	1.80954e-23	down
DBI	1622,706	17.6763	19.5977	20.559	10.0065	11.4041	9.58496	0.89983	1.8486e-23	up
TXN2	25828	42.0503	40.8327	40.3168	24.7211	26.1555	21.9098	0.759261	1.92706e-23	up
HSPG2	3339	1.2767	1.41492	1.4828	2.64584	2.23476	2.53625	-0.82923	1.93342e-23	down
RPL17	6139,100526842	59.0193	64.3653	65.0212	91.2658	98.1851	83.7658	-0.536202	1.95773e-23	down
IER2	9592	27.436	26.0651	28.5226	36.6009	39.0447	38.8141	-0.480726	1.95966e-23	down
POGLUT2	79070	12.7536	11.6038	13.337	6.693	6.63439	6.1795	0.950364	2.29799e-23	up
UNC13D	201294	5.15706	5.04618	4.671	7.79309	7.55154	8.26457	-0.666534	2.36208e-23	down
TCF7	6932	0.56017	0.590486	0.613887	1.63488	1.28841	1.4678	-1.31528	2.44316e-23	down
EXT1	2131	10.2411	10.5865	10.1014	14.2515	13.7372	15.061	-0.477038	2.50186e-23	down
ANKRD36C	400986	0.122689	0.0642844	0.0802547	0.664323	0.532512	0.486403	-2.65509	2.58406e-23	down
PALMD	54873	0.713317	0.873757	0.808634	0.131709	0.143776	0.0581642	2.84405	2.79489e-23	up
DNAJB12	54788	10.2651	10.5311	10.3692	5.94104	5.72407	6.64654	0.767181	2.9269e-23	up
RPS12	6206,6183	428.308	436.191	491.089	647.487	726.084	605.85	-0.54616	2.9667e-23	down
DLK2	65989	20.59	21.8064	22.6578	10.5547	13.0576	11.3658	0.895192	2.96842e-23	up
XBP1	7494,7495	26.3279	26.5051	26.2894	36.1619	39.2382	35.9732	-0.493245	2.99345e-23	down
NUP188	23511	14.2823	13.1404	14.1381	9.36299	9.23834	9.66659	0.556055	2.99989e-23	up
PAICS	10606	21.5086	21.8424	21.8174	27.5011	28.536	27.8552	-0.364365	3.0424e-23	down
FUCA2	2519	25.0886	26.0928	28.5715	37.3907	38.414	40.7488	-0.547382	3.59494e-23	down
CHML	1122	4.06142	3.51973	4.2113	7.58175	6.18955	7.31973	-0.838766	3.76081e-23	down
POGLUT3	143888	8.38284	8.55926	8.37422	4.68623	4.67569	5.1449	0.803336	4.07768e-23	up
CKAP5	9793	44.8503	44.6482	44.1014	34.3213	33.9975	33.5583	0.39109	4.09875e-23	up
CLEC2D	29121	0.724179	0.635893	0.699696	1.73499	1.66197	1.88215	-1.35781	4.13332e-23	down
GPSM2	29899	8.44689	8.59612	8.29952	5.9512	6.11513	6.06094	0.483398	4.3427e-23	up
ANKZF1	55139	6.01034	6.09578	6.4506	10.0504	10.1029	8.96709	-0.650086	4.36186e-23	down
PLS3	5358	67.0422	66.9144	65.9568	86.4277	87.9411	81.938	-0.358496	4.43479e-23	down
FGD4	121512	4.02103	3.69088	4.05412	6.42102	5.67355	6.71465	-0.676813	4.442e-23	down
MT-TL1		202.244	212.755	212.007	455.783	386.048	583.098	-1.18434	4.60374e-23	down
CCNB1IP1	57820	7.38623	7.66042	7.42851	12.3264	12.3151	11.4287	-0.682475	4.81057e-23	down
PDGFB	5155	3.43873	3.57934	3.81187	6.52585	6.81597	6.4159	-0.867392	5.00278e-23	down
SLC6A10P	386757	3.75942	3.96784	4.11689	7.69234	8.19294	6.57597	-0.923264	5.50586e-23	down
ZFR	51663	33.2448	33.5745	32.189	24.2418	23.94	24.0617	0.454682	5.58e-23	up
HTATSF1	27336	41.9364	45.0601	43.0496	30.5536	29.6085	28.7599	0.548411	6.01251e-23	up
NAT10	55226	23.6959	24.6155	24.6908	17.2682	17.3815	16.8979	0.502032	6.35234e-23	up
RICTOR	253260	6.12354	5.77103	5.91969	10.8889	8.30636	9.94121	-0.709794	6.37171e-23	down
CCDC113	29070	2.68164	2.47176	2.63784	4.95437	4.58961	4.51422	-0.851487	6.65815e-23	down
TP53I3	9540	3.51952	4.71016	4.39097	1.08892	1.26879	1.24342	1.80926	6.80787e-23	up
CYP4F11	57834	2.24998	2.12412	2.10804	4.28262	5.00695	5.0762	-1.1481	7.24898e-23	down
HMGB3	3149	19.4389	18.33	18.6233	11.4386	12.3861	12.2634	0.643975	7.37658e-23	up
ZNF641	121274	3.64663	4.10077	3.78412	1.95008	1.90493	2.13201	0.945673	7.53879e-23	up
STAT3	6774	25.098	24.9809	25.7078	18.8413	17.4833	18.9543	0.455217	7.78512e-23	up
PKP4	8502	10.0563	10.577	10.3487	7.06257	7.13048	6.91025	0.55396	8.04947e-23	up
REV3L	5980	6.455	6.13611	5.80096	3.70192	2.82979	3.41548	0.886723	8.22278e-23	up
RPL7P9	653702	65.3007	64.3538	57.9367	102.569	110.463	93.3063	-0.70753	8.59683e-23	down
U2AF2	11338	35.9888	37.7949	39.6883	26.2523	26.606	26.8548	0.509448	8.7004e-23	up
C2orf49	79074	5.06225	5.23138	5.34327	8.47637	8.26456	8.42461	-0.686495	8.93245e-23	down
TRMT2B	79979	3.21664	3.31426	3.59946	1.3398	1.39801	1.33967	1.31293	9.34754e-23	up
ARFGEF3	57221	1.93638	1.89367	2.10647	3.93538	3.0685	3.57586	-0.833617	9.51136e-23	down
HMGN2	3151	79.81	82.5391	83.9389	59.5061	60.1883	62.2465	0.436877	9.66767e-23	up
CSRNP1	64651	3.66748	2.83579	3.3557	6.49862	7.99339	7.37387	-1.14917	9.92606e-23	down
SLC9A3R1	9368	36.1189	40.2937	36.817	22.6368	23.662	24.5533	0.67637	9.9485e-23	up
CCDC80	151887	5.47831	5.73427	5.05674	3.1594	3.14859	3.42167	0.741694	1.00372e-22	up
MAN1A2	10905	12.0081	11.9088	11.7772	7.2124	6.42921	8.00862	0.7213	1.01113e-22	up
DENND2D	79961	10.711	10.7032	10.0381	6.83671	6.65509	6.53568	0.651182	1.09455e-22	up
FER1L4	80307	1.71029	1.43415	1.71417	3.30309	2.97535	2.88419	-0.915217	1.2093e-22	down
DEPDC1	55635	22.6636	22.5874	23.0951	15.3449	13.9613	16.0897	0.590297	1.30469e-22	up
RALB	5899	13.8116	14.5841	14.2318	20.8651	21.6114	20.9437	-0.573159	1.32634e-22	down
ZNF592	9640	12.7476	12.9003	13.2642	8.70972	7.95354	8.99529	0.600779	1.37394e-22	up
SGO2	151246	4.8012	4.54379	4.50349	2.54542	2.1518	2.37893	0.968691	1.48667e-22	up
MTG2	26164	11.4037	11.0496	11.8901	7.46113	7.48172	7.28907	0.627404	1.48947e-22	up
MGST1	4257	18.7704	19.2529	19.672	24.5157	26.0765	25.1047	-0.391782	1.49173e-22	down
RIPK1	8737	3.821	4.01095	4.10874	2.45819	2.3687	2.45898	0.712713	1.51286e-22	up
THNSL2	55258	6.3954	6.69566	7.25643	4.13909	4.07962	4.02502	0.732808	1.55141e-22	up
ING3	54556	3.78912	3.92084	3.99191	1.54242	1.94422	1.55007	1.21619	1.58674e-22	up
DENND3	22898	1.16594	1.24712	1.27263	2.16137	2.04344	2.19391	-0.795851	1.59533e-22	down
DNAJC5	80331	21.499	22.6386	23.0398	15.1953	15.9639	15.0999	0.538238	1.60716e-22	up
ACP2	53	9.3523	9.92434	9.5096	5.09292	5.47965	4.62712	0.921337	1.6937e-22	up
KCTD18	130535	5.75246	6.46545	5.78461	2.91091	3.22275	2.98628	0.981103	1.70656e-22	up
SLC25A11	8402	29.6946	28.4959	28.8186	18.7719	19.5368	19.0143	0.602049	1.87049e-22	up
STK26	51765	21.9827	23.1506	22.7208	32.2437	30.3919	31.8049	-0.476969	1.90051e-22	down
ADAM15	8751	10.3577	9.86003	10.4062	13.8893	15.3762	14.4638	-0.513942	2.11912e-22	down
RPS23	6228	83.0001	83.2234	84.3644	107.805	117.84	104.408	-0.397383	2.14689e-22	down
CORO2A	7464	7.08576	7.11397	6.47947	10.6495	10.3981	11.1069	-0.636836	2.31843e-22	down
BACH1	571,83990	2.27318	2.07743	2.02137	3.9421	3.64425	4.08714	-0.87342	2.55787e-22	down
ZBTB1	22890	15.3949	15.0306	14.8456	10.4565	10.3015	10.3766	0.54007	2.60316e-22	up
AMN1	196394	4.65997	4.19941	4.63552	7.96851	9.04819	8.236	-0.904023	2.63642e-22	down
ERMARD	55780	7.69544	7.47586	7.66706	4.41973	4.28989	4.01004	0.844399	2.67577e-22	up
ADAT2	134637	1.68216	1.6815	1.60381	3.30875	2.96821	3.26939	-0.94244	2.78514e-22	down
SGPL1	8879	7.9165	7.72183	8.43005	5.52048	5.33097	5.49018	0.558586	2.82841e-22	up
SLC41A3	54946	10.7092	10.103	10.786	6.72854	7.04008	6.32171	0.653343	2.93532e-22	up
CERK	64781	20.1517	19.104	19.7861	26.1172	26.4738	25.7928	-0.408818	2.97405e-22	down
PSMD5	5711	20.7095	21.1412	20.548	14.338	14.1158	14.2102	0.548496	3.10765e-22	up
NIPA2	81614,4195	17.6038	17.1248	17.6995	11.5085	11.494	12.3368	0.569068	3.18915e-22	up
P2RY1	5028	2.20949	2.2554	2.34212	4.5245	3.90156	4.17801	-0.888797	3.28069e-22	down
PRKCSH	5589	29.9421	28.9553	30.5205	42.9753	41.1855	51.5672	-0.602084	3.35094e-22	down
SFXN3	81855	2.78906	2.67014	2.60592	5.02441	5.24311	4.82039	-0.903626	3.39281e-22	down
UCK1	83549	23.7825	23.2419	23.0046	13.0072	15.1268	12.427	0.787859	3.52781e-22	up
SCYL2	55681,6358	16.9802	17.2786	17.2531	12.3949	10.8832	11.2516	0.577068	3.53086e-22	up
HCAR2	338442	25.9993	26.5257	25.7752	37.0268	39.8383	36.7901	-0.537575	3.79619e-22	down
GFPT2	9945	3.86977	3.8771	4.07716	7.204	6.71278	6.42685	-0.782856	3.82478e-22	down
USF3	205717	3.58193	3.68652	3.69806	2.28707	2.02048	2.23879	0.744344	4.03576e-22	up
SH3BGRL	6451	17.9341	17.7391	17.3348	9.56161	10.4548	10.3237	0.804984	4.31029e-22	up
ACACA	31	27.266	27.0367	27.8466	20.6223	18.1501	19.91	0.485321	4.35043e-22	up
INTS8	55656	8.49908	8.64439	7.93001	12.2398	11.9253	11.8294	-0.521617	4.38931e-22	down
RXRA	6256	22.8487	22.8045	24.4007	16.8981	16.6376	17.7862	0.448888	4.48954e-22	up
C1orf115	79762	7.56209	7.34526	7.86098	3.58401	3.82599	3.90878	1.00831	4.75628e-22	up
MYPN	84665	0.769297	0.747985	0.757358	1.66601	1.73551	1.63466	-1.14669	4.77961e-22	down
ELFN2	114794	0.357619	0.525136	0.508032	1.28852	1.55581	1.37664	-1.60168	4.78188e-22	down
SEPHS1	22929	21.2276	21.2877	21.9929	13.5295	14.5954	14.6417	0.592999	4.82722e-22	up
PAWR	5074	4.96822	5.32811	5.14649	7.69947	7.24569	8.37147	-0.594423	4.83202e-22	down
DDAH2	23564	7.98464	8.30689	8.88314	13.9517	13.8972	14.6407	-0.755138	4.8768e-22	down
TSLP	85480	0.748543	0.374324	0.667832	2.33943	2.48202	2.32834	-1.99738	5.10299e-22	down
CSNK1E	1454	29.221	28.8925	30.0382	37.7094	38.3816	35.9531	-0.346007	5.20125e-22	down
H2AZ1	3015	236.574	220.344	248.073	152.682	175.819	151.996	0.553079	5.43373e-22	up
MFNG	4242	3.251	4.44723	4.25145	8.47451	8.45263	8.59434	-1.09474	5.7455e-22	down
VPS35	55737	19.4026	20.1336	18.9537	25.1177	25.9962	25.3168	-0.385964	5.79629e-22	down
KIAA0930	23313	11.2494	11.8535	12.0743	15.5321	15.9041	16.5901	-0.449182	5.80101e-22	down
CYB5D2	124936	9.33693	8.79923	9.69486	4.23102	4.67177	4.43994	1.06064	5.9412e-22	up
PRMT1	3276	44.8936	43.0071	47.9817	31.5857	33.2767	29.845	0.520809	6.75215e-22	up
RBM23	55147	6.90725	7.01038	6.92602	4.38216	4.77361	4.7773	0.581095	6.79997e-22	up
TOE1	114034	12.8979	12.2864	12.8919	6.57061	7.09067	7.12161	0.87349	6.82025e-22	up
NXF1	10482	12.4851	13.2361	13.5836	8.67247	8.52656	8.8654	0.592622	7.10167e-22	up
MXI1	4601	3.36993	4.02362	3.81498	7.19678	6.66229	6.21345	-0.840624	7.4414e-22	down
SMIM14	201895	3.24447	3.55883	3.05498	5.70587	5.5428	5.95407	-0.803231	8.54001e-22	down
DLL1	28514	18.3792	17.852	17.5693	11.421	11.4919	12.0387	0.62226	9.08853e-22	up
RAB12	201475	17.4214	16.8396	19.1629	25.867	27.3156	26.6222	-0.578993	9.38863e-22	down
BTBD11	121551	1.16742	1.16215	1.19217	2.29218	2.27528	2.54001	-1.01305	9.83678e-22	down
CUTALP	253039	3.31269	3.36992	3.18772	1.75698	1.70218	1.47634	0.999903	1.00683e-21	up
PA2G4	5036	47.7825	49.7521	48.8599	61.2875	65.7726	64.8063	-0.39024	1.03384e-21	down
SOWAHC	65124	8.05213	8.68573	7.97255	12.9942	12.2311	13.8317	-0.660463	1.07243e-21	down
KANK1	23189	0.72217	0.686258	0.729408	0.330476	0.345083	0.328614	1.09014	1.07461e-21	up
NIPSNAP2	2631	20.438	20.0897	20.0024	26.8219	28.5294	26.1057	-0.428386	1.07582e-21	down
GSDME	1687	1.59135	1.65609	1.65743	2.97415	2.9239	2.84201	-0.833428	1.12104e-21	down
PPP4R3A	55671	54.4676	53.4686	54.8682	42.4847	40.9602	41.6948	0.3796	1.13347e-21	up
SETD1B	23067	7.88346	8.14639	8.78515	5.50895	5.15322	5.2946	0.637044	1.18719e-21	up
SARS2	54938	11.1059	11.4944	11.9555	6.00015	6.89681	6.06676	0.865687	1.20918e-21	up
ZNF326	284695	9.36554	9.04797	9.4186	6.5728	6.42324	6.57691	0.507889	1.28212e-21	up
GTPBP1	9567	9.0071	8.81419	10.1374	13.1422	13.3252	14.5021	-0.551256	1.31999e-21	down
ZIC2	7546	0.760767	0.976543	0.819309	2.62581	2.58656	2.68146	-1.62649	1.42634e-21	down
PPM1E	22843	0.309466	0.214912	0.320857	1.19239	1.00283	1.07868	-1.95358	1.44211e-21	down
PLK2	10769	23.1993	22.5302	22.015	15.8861	14.8513	15.5036	0.550932	1.50372e-21	up
ARID1A	8289	5.07254	5.08697	5.05221	3.36279	3.18134	3.49704	0.599256	1.56857e-21	up
RSAD2	91543	1.43143	1.32725	1.15978	3.37293	3.20963	2.69622	-1.24365	1.58279e-21	down
RC3H2	54542	13.6197	14.1667	14.1036	10.0669	9.15967	10.0031	0.51917	1.61321e-21	up
DDX5	1655	131.653	127.477	130.075	101.198	104.684	99.3788	0.350488	1.64604e-21	up
PTGS2	5743	0.97383	1.02979	0.976686	2.34874	2.22352	2.37519	-1.22102	1.67093e-21	down
MRC2	9902	4.4585	4.11473	4.69969	7.40477	6.68319	7.23371	-0.683835	1.7102e-21	down
AFMID	125061	8.96436	8.71061	9.21059	12.9072	14.573	14.0256	-0.62648	1.71572e-21	down
TTC8	123016	16.8113	17.5424	17.319	11.7802	12.2455	11.1812	0.553542	1.74632e-21	up
NIPAL4	348938	0.532155	0.571676	0.627369	2.03452	1.89608	1.72891	-1.7089	1.76487e-21	down
B4GALT1	2683	20.8586	23.4085	23.4047	31.7545	30.4909	32.0108	-0.478033	1.85671e-21	down
RHOBTB3	22836	1.04305	1.21366	1.25901	2.41883	2.39896	3.11414	-1.17385	1.94674e-21	down
PPP1R12B	4660	2.66369	2.63394	2.62723	3.7422	3.73124	3.59914	-0.482534	2.12636e-21	down
LSM14B	149986	23.2073	23.0747	24.2153	15.3932	15.9765	16.2058	0.567349	2.13607e-21	up
PCDH1	5097	14.3399	14.5349	15.0762	19.263	20.9768	21.875	-0.499041	2.15824e-21	down
PTPN11	5781	18.8251	19.0082	18.8716	23.7748	23.4105	25.1143	-0.350518	2.31562e-21	down
WDR45B	56270	55.8567	59.5487	58.4103	75.8485	77.0078	72.497	-0.37463	2.40203e-21	down
NT5E	4907	1.08022	1.01478	0.712153	2.64599	2.93251	2.73545	-1.56643	2.41961e-21	down
ADIRF	10974	27.2126	31.3096	28.0392	7.78065	12.5539	11.0331	1.46445	2.47019e-21	up
PDIA5	10954	4.79423	4.94425	4.86542	9.05612	8.9028	7.64432	-0.809973	2.71089e-21	down
BTBD7	55727	13.5763	13.7514	13.6939	9.63462	8.75945	9.87127	0.537352	2.99687e-21	up
FAM50B	26240	6.91057	6.95716	7.90646	2.36583	3.02763	2.93317	1.38681	3.01331e-21	up
TYK2	7297	8.01849	8.01425	8.81618	5.46455	5.47934	5.35849	0.608101	3.51411e-21	up
ADPGK	83440	11.6678	11.6347	11.7269	6.78224	7.61264	7.69307	0.665307	3.52205e-21	up
STXBP4	252983	0.962628	0.897075	0.998262	0.42713	0.452676	0.441444	1.11309	3.65496e-21	up
HNRNPA0	10949	23.5392	22.4637	23.8965	15.3947	16.3408	17.3255	0.510702	3.77445e-21	up
HLA-E	3133	85.992	85.9313	89.5406	106.933	111.756	107.012	-0.316934	3.81133e-21	down
PPP6R3	55291	43.3108	41.2635	43.1411	32.7102	33.2565	32.3226	0.377826	3.97e-21	up
CENPB	1059	21.624	20.9997	23.766	11.7112	12.8141	14.1857	0.778216	3.98328e-21	up
USP3	9960	3.59389	3.59002	3.83264	5.71719	5.50255	5.91659	-0.637386	4.05139e-21	down
PPP1R26	9858	21.5396	21.6158	21.5792	28.6612	28.101	27.3725	-0.378163	4.2602e-21	down
MIS18BP1	55320	20.2571	20.9181	19.631	14.3813	12.5777	13.3106	0.594525	4.2931e-21	up
ERGIC2	51290	6.6591	5.98139	6.06258	9.30939	10.2189	9.57458	-0.637888	4.32731e-21	down
GDAP1	54332	1.62066	1.65236	1.6685	0.942651	1.02893	0.912588	0.776796	4.37734e-21	up
ZSCAN31	64288,342357	9.00185	9.3082	9.14282	4.78865	5.7373	4.81359	0.839701	4.42664e-21	up
P4HA2	8974	2.17236	2.27952	2.324	3.82409	3.79758	3.46992	-0.710986	4.68452e-21	down
TRA2B	6434	28.2324	26.8571	27.5866	20.6907	20.4455	21.4731	0.401093	4.84035e-21	up
EARS2	124454	9.04833	9.67405	9.38342	6.05325	6.17865	6.08698	0.617536	4.93093e-21	up
SHFL	55337	8.26732	8.67865	8.8542	5.26115	4.78317	4.89481	0.788286	4.96404e-21	up
DHFR2	200895	5.48192	5.15583	5.44165	2.53382	2.45461	2.90783	1.02597	5.01805e-21	up
SRPX2	27286	0.682813	0.554869	0.526186	1.40605	1.69094	1.76838	-1.46381	5.20716e-21	down
CHTF8	54921,113455421	45.4218	45.6507	47.7188	25.9427	32.6812	26.765	0.700796	5.21344e-21	up
NFRKB	4798	16.0793	15.519	15.6951	11.238	10.3153	10.8245	0.546632	5.58133e-21	up
VCL	7414	33.5554	34.782	35.1639	41.7763	43.1484	43.4784	-0.311032	5.5868e-21	down
SH3PXD2B	285590	1.44741	1.37961	1.10891	2.93069	2.60683	2.91614	-1.10287	5.77302e-21	down
NUP93	9688	6.44248	6.51509	6.7385	8.90787	9.20336	8.6638	-0.44298	6.09756e-21	down
BRK1	55845	74.3829	67.4212	71.584	101.397	112.907	97.133	-0.54546	6.14881e-21	down
FAM8A1	51439	4.53769	4.62183	4.5911	7.03687	7.32745	7.24624	-0.65224	6.36831e-21	down
CENPV	201161	2.12102	2.31346	2.12091	4.74142	5.28777	4.78765	-1.17648	6.62541e-21	down
NGEF	25791	1.21469	1.28152	1.09048	3.00249	2.6251	3.03958	-1.27291	6.72126e-21	down
ACSL4	2182	4.01692	4.00503	3.7372	6.07824	5.78781	5.8052	-0.587619	6.74062e-21	down
SKP1	6500	17.8598	17.7704	17.6629	12.3623	13.2625	11.4456	0.523678	6.9353e-21	up
SDC4	6385	101.236	102.915	106.617	127.6	129.456	136.422	-0.340442	6.94353e-21	down
GALNT6	11226	1.19241	1.2038	1.15716	2.54353	2.34122	2.30671	-1.0171	6.97013e-21	down
JUN	3725	26.0562	27.5901	28.2282	36.1838	40.3752	37.3737	-0.476694	7.19719e-21	down
ATXN7L3	56970	24.472	25.2936	26.721	18.5253	18.1148	17.7594	0.491614	7.32386e-21	up
PTBP2	58155	4.86894	4.53625	4.61909	3.03307	2.37914	2.65508	0.797772	7.35106e-21	up
ZC3HAV1	56829	14.5425	15.9056	15.309	20.1111	20.3247	21.1156	-0.427795	7.39802e-21	down
VEGFC	7424	1.03095	0.865921	0.8268	3.25783	2.77328	2.88684	-1.71116	8.20678e-21	down
NME1	4830,6023	33.1543	31.9292	38.0066	18.8834	23.0524	19.8627	0.738263	8.27266e-21	up
RNF115	27246	2.53414	2.6589	2.52432	1.4316	1.3679	1.4367	0.865336	8.3344e-21	up
ATP6V1E1	529	23.1773	21.8456	22.5397	30.1821	33.0733	31.1912	-0.483273	8.62378e-21	down
SAMD4A	23034	0.684333	0.66165	0.872574	1.55761	1.55935	1.73879	-1.13007	8.75161e-21	down
SYNGR2	9144	32.7256	33.3785	32.8015	43.2476	45.9799	41.9848	-0.407779	9.17473e-21	down
CNTN5	53942	0.507524	0.569302	0.616212	0.117895	0.0854098	0.0506978	2.7367	9.22075e-21	up
SYT7	9066	1.19451	1.20751	1.14553	2.70846	2.19224	2.71175	-1.10154	9.56309e-21	down
NCOR1	9611	14.6258	14.9074	14.6422	11.0415	10.3568	11.0409	0.445504	1.01525e-20	up
SLC35C2	51006	7.23627	7.28126	6.96273	4.62023	4.58603	4.5294	0.645085	1.02465e-20	up
MT-TF		16.2461	14.692	15.6493	71.769	61.1427	84.3613	-2.2215	1.02967e-20	down
RPS27A	6233	77.1629	77.4355	77.9972	104.522	115.853	98.0407	-0.453083	1.05265e-20	down
AP5S1	55317	2.36173	2.61599	2.89816	1.07048	0.883715	1.09418	1.3694	1.12434e-20	up
TMED2	10959	103.09	106.867	102.245	127.861	139.971	134.087	-0.364426	1.12993e-20	down
STC1	6781	1.10346	1.12783	1.39303	3.16764	3.1807	2.76735	-1.33064	1.18684e-20	down
PARPBP	55010	8.47438	9.14052	8.52237	4.95754	5.35905	4.86757	0.783541	1.20013e-20	up
HFE	3077	7.35544	7.14295	7.52332	4.39057	4.42695	3.75519	0.808631	1.26455e-20	up
ENSG00000259171		0	0	0	3.34068	4.69433	4.29656	-15.327	1.26632e-20	down
LRSAM1	90678	2.62805	2.69221	3.02139	4.34435	4.53562	4.37949	-0.668618	1.43136e-20	down
ELK3	2004	12.6248	13.2955	11.9544	19.3882	17.718	18.7496	-0.560469	1.45832e-20	down
FIBCD1	84929	0.0267512	0.0426724	0.083807	0.966043	0.794525	0.528979	-3.90129	1.47729e-20	down
ARL14	80117	2.11934	1.83723	1.85575	6.00385	5.91255	5.81947	-1.60948	1.55242e-20	down
PPTC7	160760	10.1921	10.0782	10.4488	13.9015	13.9772	14.2239	-0.454774	1.61545e-20	down
MCTP2	55784	1.67918	1.66194	1.62552	2.94455	2.54479	2.94854	-0.764608	1.6786e-20	down
MICALL2	79778	1.22479	1.32043	1.53826	2.91971	2.52598	2.68919	-0.994321	1.72301e-20	down
TYSND1	219743	12.5596	12.6406	13.9141	8.46038	8.4841	8.17362	0.638965	1.73899e-20	up
COG5	10466	7.98634	8.13104	7.27875	11.5061	12.1152	10.9322	-0.562561	1.75546e-20	down
RPL37	6167	18.9737	19.2912	16.879	28.7472	30.5682	24.7969	-0.609117	1.81435e-20	down
CDKN3	1033	28.6271	30.8591	30.5829	18.4917	19.6226	18.3837	0.672832	1.82197e-20	up
INPP1	3628	14.5863	14.1249	13.6089	8.28124	8.91001	8.85684	0.700169	1.84129e-20	up
MARF1	9665	9.30612	9.07316	9.54707	6.67558	6.07263	6.4634	0.539649	1.89031e-20	up
TENM3	55714	1.88709	1.86717	1.89145	1.01604	0.845415	0.934239	1.01395	2.05552e-20	up
APEX1	328	100.303	101.61	103.568	66.0608	76.2159	66.952	0.546001	2.06182e-20	up
SCARB2	950	5.55953	5.3556	5.52955	7.16607	6.98127	7.34817	-0.386415	2.14318e-20	down
RHNO1	83695	32.6198	33.4322	32.1592	21.1722	23.0437	21.4082	0.581662	2.1697e-20	up
DNAJA2	10294	24.6081	24.4734	25.3858	31.5204	31.6016	32.9142	-0.36697	2.21649e-20	down
SLC2A6	11182	4.35541	3.87553	4.0069	1.51698	1.71002	1.83103	1.2747	2.23196e-20	up
NUP58	9818	9.17473	8.88947	9.16126	11.7213	11.4644	12.1417	-0.37583	2.23279e-20	down
TAX1BP3	30851	122.174	125.268	131.631	85.2546	93.3352	90.7486	0.493057	2.25023e-20	up
ENSG00000286148		15.741	16.5706	16.6586	3.3024	4.03748	3.3315	2.19816	2.32248e-20	up
ANKRD10-IT1	100505494	20.6601	22.4578	20.2412	48.7791	35.6009	41.8479	-0.994408	2.32946e-20	down
TSPYL1	7259	10.3039	10.5631	11.1241	7.19143	7.06089	7.5963	0.550131	2.34166e-20	up
SMIM13	221710	4.79067	4.18598	4.16656	7.32587	7.2403	7.95057	-0.77668	2.36104e-20	down
RAD18	56852	2.98359	3.06881	3.13291	4.80755	4.89774	5.1385	-0.692459	2.3749e-20	down
HMGN5	79366	8.51302	7.76082	7.8658	3.80797	4.08684	3.65579	1.06344	2.43093e-20	up
FN1	2335	0.953704	0.982543	1.16211	1.89299	1.74603	2.05456	-0.877832	2.45703e-20	down
PDP2	57546	2.73669	2.6426	3.19818	4.96072	4.73369	4.66734	-0.743606	2.50032e-20	down
GTPBP4	23560	14.2809	14.1428	14.4447	18.4102	19.4559	18.9704	-0.406902	2.88623e-20	down
TBC1D9B	23061	17.8767	17.9312	18.3931	13.7078	13.7753	13.0075	0.420735	2.92051e-20	up
EGFL7	51162	9.58388	8.21851	9.57077	14.3747	16.1754	15.6542	-0.755267	2.9311e-20	down
TRAK2	66008	5.55671	5.17246	4.92179	2.96182	2.9614	3.10665	0.793474	2.97741e-20	up
NUP155	9631	10.1977	9.68199	10.1405	13.6555	12.8381	13.8052	-0.424804	3.22211e-20	down
CNBP	7555	90.2378	86.3244	91.2235	111.191	120.825	110.142	-0.353585	3.25205e-20	down
GRWD1	83743	6.73583	6.37001	6.81806	3.92098	4.04481	4.01399	0.733898	3.30247e-20	up
DIDO1	11083	14.4996	13.5033	14.3804	10.4947	10.5783	10.3451	0.431897	3.48981e-20	up
ANKRD40	91369	21.4659	20.7289	21.0751	15.2388	14.9596	14.6737	0.495697	3.80715e-20	up
ASAP2	8853	3.74383	4.1206	3.55063	6.44717	6.01369	6.20987	-0.709839	4.3433e-20	down
B4GAT1	11041	6.3278	6.48871	7.22641	11.8804	12.3009	11.8005	-0.844176	4.38021e-20	down
PEX10	5192	6.3145	6.51644	6.22411	3.39278	3.13188	2.63607	1.05664	4.42084e-20	up
CD47	961	20.1094	19.7164	20.9932	27.8095	25.0434	27.3239	-0.398663	4.42924e-20	down
GLCE	26035	6.73914	6.16144	6.13983	3.84286	3.86838	3.66575	0.742946	4.51121e-20	up
TNC	3371,7134	0.50075	0.390505	0.378684	1.0861	1.22577	1.14391	-1.44426	4.62714e-20	down
MED16	10025	9.20494	9.31158	9.50705	5.25411	4.81819	5.79123	0.820927	4.84562e-20	up
RPL22	6146	55.1281	55.2069	55.6864	70.5793	72.932	66.6735	-0.340289	5.33421e-20	down
RPL13A	23521	308.609	312.212	316.859	389.725	458.677	400.824	-0.413867	5.90934e-20	down
SFN	2810,25996	266.582	259.954	270.509	316.132	336.299	334.087	-0.307685	6.14331e-20	down
NPLOC4	55666	19.4421	19.5442	19.7408	25.0144	24.109	24.0603	-0.317499	6.15534e-20	down
NDUFA6	4700	48.1734	51.5128	50.6794	32.1495	33.8304	33.0591	0.602405	6.2312e-20	up
REPS2	9185	0.782298	1.02123	0.937214	2.06653	1.7545	2.3089	-1.1613	6.3261e-20	down
RNASEL	6041	3.94083	3.62018	4.08039	2.1368	1.84013	1.739	1.02621	6.38417e-20	up
P2RX5	5026,100533970	2.11589	1.90331	1.93145	4.52009	3.85393	4.1058	-1.06848	6.48352e-20	down
POLR1A	25885	7.34767	7.05705	7.80568	5.29029	5.04255	5.41317	0.496249	6.74012e-20	up
ABCC3	8714	4.92343	4.88097	5.14317	7.53683	7.83881	6.78568	-0.568133	6.74916e-20	down
CD9	928	71.1325	70.452	70.8121	93.1307	107.129	89.559	-0.448392	6.7648e-20	down
SH3BGRL3	83442	26.392	31.2236	29.4606	49.6301	47.4275	46.5172	-0.721451	6.7873e-20	down
H2BC12	85236	72.5828	74.6426	81.8505	41.8523	46.4942	39.1709	0.845132	6.88922e-20	up
UROS	7390	3.47696	3.90816	3.88043	2.20058	2.15306	2.1136	0.800696	7.04519e-20	up
CENPM	79019	16.2106	15.2672	17.2752	8.00953	9.38972	8.37733	0.919432	7.61617e-20	up
NMT2	9397	3.14143	3.37869	3.15888	5.61255	5.16079	5.20974	-0.723616	7.64611e-20	down
ECPAS	23392	15.0112	15.1465	15.539	10.7935	11.2525	10.163	0.504623	7.91099e-20	up
PGF	5228	0.202018	0.159099	0.28931	0.975679	1.10039	0.912012	-2.19976	7.97808e-20	down
PHF20L1	51105	7.51875	7.37657	7.41454	5.25367	5.12505	5.58636	0.482762	7.99703e-20	up
CBX1	10951	73.8021	73.3116	74.6446	55.2059	57.5363	55.5537	0.397989	8.11716e-20	up
SEC24D	9871	1.99343	1.85913	1.60221	3.25012	3.24544	3.33995	-0.85048	8.23841e-20	down
SLC45A4	57210	1.25925	1.37515	1.17494	2.55431	2.32354	2.58115	-0.969441	8.74848e-20	down
ARL2BP	23568	23.9073	27.9801	25.6291	13.7966	15.0683	15.7578	0.796728	8.80001e-20	up
PSD3	23362	1.3799	1.09021	1.20157	2.21515	2.28197	2.08684	-0.842513	9.0075e-20	down
NPR3	4883,8131	0.253244	0.200296	0.212388	0.759836	0.647155	0.799608	-1.72839	9.09062e-20	down
MARVELD1	83742	6.81549	7.5856	6.68246	11.9113	11.7844	11.1194	-0.723595	9.79531e-20	down
TANC2	26115	1.20156	1.27633	1.36082	2.39222	1.89872	2.23082	-0.764639	9.86589e-20	down
CP	1356	23.1616	22.1285	19.9104	15.0985	13.5835	13.1007	0.641974	1.02048e-19	up
POMGNT2	84892	2.02019	2.35878	2.20976	0.930565	0.988374	0.958561	1.19518	1.03826e-19	up
CDV3	55573	49.1283	52.211	53.0139	37.3357	35.597	38.701	0.467464	1.05784e-19	up
DGCR2	9993,8026	13.4748	14.1781	13.6965	9.34302	9.38262	9.42834	0.554528	1.08563e-19	up
NDUFA11	126328	7.74012	7.93431	8.67062	4.07626	4.67091	4.8457	0.840779	1.12078e-19	up
SH3PXD2A	9644	5.01175	5.42942	5.11837	8.23918	7.02942	8.18271	-0.591869	1.14414e-19	down
RPS7	6201	40.1315	40.1753	42.0367	53.3685	61.8199	52.69	-0.45648	1.15858e-19	down
STXBP5-AS1	729178	0.0527314	0.0579313	0.0468616	0.282974	0.287416	0.282912	-2.43748	1.22874e-19	down
ARHGAP8	23779	11.9181	12.2405	12.4988	16.3561	17.9335	16.9652	-0.483585	1.22944e-19	down
LIPH	200879,3990	0.303037	0.550231	0.405708	2.00784	1.80667	1.51549	-2.08188	1.27403e-19	down
TUBGCP5	114791	5.14847	5.53004	5.17073	2.76504	3.11895	3.01598	0.832539	1.37696e-19	up
MRPS7	51081	19.0698	19.6538	20.1902	12.8623	13.4644	12.1824	0.613404	1.40086e-19	up
BTBD6	90135	16.4411	17.1691	17.5025	8.38868	10.4874	8.07159	0.923524	1.42781e-19	up
H2AX	3014	94.3346	105.955	105.477	63.3422	73.0257	65.0223	0.602438	1.49259e-19	up
RNF19A	25897	13.017	12.0527	13.1322	18.0045	16.7517	17.4832	-0.451498	1.50532e-19	down
PPM1M	132160	0.739717	0.766483	1.06287	2.72546	2.35216	2.79216	-1.61508	1.54954e-19	down
CDCA7L	55536	11.0466	10.8626	10.625	15.3272	15.7068	15.4632	-0.515189	1.59107e-19	down
BCLAF1P2	731605	5.42738	5.17304	5.02316	2.23327	2.19548	2.36355	1.20175	1.60108e-19	up
MFSD6	54842	9.80968	9.6122	9.54162	6.45742	5.81472	6.27829	0.642783	1.63126e-19	up
AMD1	262	19.912	19.9084	19.8567	14.6814	14.1042	15.2339	0.439038	1.64483e-19	up
FAM102A	399665	4.14358	4.09574	3.75157	6.52452	6.49126	6.09787	-0.672665	1.69001e-19	down
RPS8	6202	254.295	265.566	266.431	330.214	373.765	326.591	-0.390305	1.71144e-19	down
RASSF5	83593,283349	0.860305	1.04517	0.911894	2.12879	2.03454	2.06172	-1.14374	1.71528e-19	down
TEP1	7011,5728	3.19922	3.42841	3.5857	5.38584	4.85202	5.66843	-0.639144	1.72891e-19	down
ALKBH5	54890	19.4692	20.3192	20.5707	13.7938	13.5192	13.7847	0.554516	1.75538e-19	up
BRCA1	672	8.58018	8.27378	8.55958	6.1612	5.99541	6.25079	0.465311	1.77632e-19	up
CLCC1	23155	4.1553	4.28178	4.43277	3.0043	2.97483	2.99451	0.520231	1.93059e-19	up
NRIP1	8204	3.78875	3.47916	3.8237	5.66413	5.40751	5.61233	-0.588993	1.94135e-19	down
NAPRT	93100	8.76804	7.57017	8.58094	13.0404	15.2744	13.7425	-0.755103	2.20465e-19	down
MAPRE3	22924	1.89195	1.96703	2.27634	4.63782	4.28904	4.10957	-1.08734	2.23605e-19	down
ARMC6	93436	6.69165	6.26649	6.29745	3.661	3.25528	3.01605	0.955073	2.24796e-19	up
RPS3	6188	62.5327	59.1242	63.6518	76.0477	83.2107	76.4859	-0.347293	2.32326e-19	down
TCAF1	9747	15.1839	14.4034	15.004	9.671	8.45004	10.2153	0.654104	2.3345e-19	up
ISYNA1	51477	7.85121	8.31346	8.44464	13.0246	12.4206	12.5591	-0.626956	2.36822e-19	down
NCF2	4688	0.445658	0.505505	0.456465	1.5804	1.66738	1.40506	-1.72485	2.39681e-19	down
RANBP6	26953	35.2562	32.4946	33.8199	47.5788	43.6027	43.2999	-0.404923	2.41639e-19	down
HSPA12A	259217	2.40205	2.45505	2.47549	1.63741	1.51624	1.55472	0.639096	2.45348e-19	up
MYH14	79784,57644	6.29953	6.83692	6.79441	9.54898	8.98221	10.3365	-0.534452	2.59406e-19	down
USP34	9736	12.5954	11.8496	11.8338	8.82235	7.4666	8.42567	0.553762	2.76456e-19	up
OGDH	4967	43.386	43.5592	42.0922	31.5754	31.3554	32.9026	0.429188	2.87382e-19	up
MT-TH		123.709	119.21	130.779	46.6141	40.9232	41.559	1.53342	2.97309e-19	up
CIRBP	1153	14.3776	13.559	15.2479	9.06265	8.46723	10.0082	0.649084	3.0922e-19	up
BSG	682	124.413	123.375	133.39	154.24	155.329	165.395	-0.317353	3.1208e-19	down
S100A9	6280	14.5043	10.425	13.3547	29.2387	34.2277	27.2463	-1.24456	3.15965e-19	down
SMC6	79677	7.11091	6.98466	6.92246	4.82145	4.16831	4.50262	0.639482	3.34729e-19	up
CYFIP1	23191	14.2846	13.8445	13.8087	17.454	18.179	17.7197	-0.347312	3.46861e-19	down
UGT1A6	54578	18.7289	19.443	19.4181	12.8841	13.9773	12.8446	0.536462	3.58031e-19	up
UBE2E1	7324	21.5312	20.6283	23.4511	29.8527	31.6215	29.5806	-0.472807	3.65322e-19	down
DYRK1B	9149	6.15213	6.78113	7.66932	3.13505	3.43443	3.40392	1.04667	3.8334e-19	up
MARCHF5	54708	12.6826	13.2422	13.4681	18.5741	17.8688	17.57	-0.455366	4.02687e-19	down
ITGB1	3688	45.2426	44.1786	44.3187	52.8678	54.0874	52.5366	-0.254052	4.06454e-19	down
APOL6	80830	25.1938	24.865	26.637	18.0663	16.7456	19.372	0.501283	4.14175e-19	up
RSL1D1	26156	23.0238	23.7106	22.5994	29.1012	31.3144	30.4137	-0.3896	4.15202e-19	down
ERAP2	64167	41.2901	40.0185	39.9309	30.1182	30.4525	31.4927	0.39716	4.18287e-19	up
ZNF519	162655	1.07218	0.955258	0.906224	1.73485	1.7972	1.68533	-0.830624	4.20612e-19	down
LCMT2	9836	2.10019	2.40002	2.42503	1.09731	1.04066	1.02197	1.13197	4.29984e-19	up
ZDHHC13	54503	10.0154	9.36811	9.67774	6.75409	6.38423	6.6107	0.557314	4.47342e-19	up
DDX60L	91351	7.47827	7.3289	7.20743	5.07357	4.46999	5.02433	0.595669	4.50481e-19	up
UNC5B	219699	7.50417	7.74409	7.11123	10.8446	11.4529	10.358	-0.546438	4.65784e-19	down
GM2A	2760	9.38762	8.54221	10.0694	13.8723	13.7097	14.8216	-0.598802	4.65806e-19	down
ITGAX	3687	0.0654853	0.0619724	0.0933371	0.475571	0.432344	0.547484	-2.72064	4.70778e-19	down
TUBA1B	10376	277.79	280.544	277.999	198.607	222.891	198.729	0.431281	4.7942e-19	up
FABP5	2171,387934	12.8533	12.4822	12.4078	19.1754	22.048	19.8288	-0.693824	5.1385e-19	down
SHMT1	6470	14.0103	13.6729	14.6437	9.97585	10.0521	10.1752	0.48688	5.24022e-19	up
SUB1	10923	14.8447	15.6338	15.4045	19.1523	19.853	19.813	-0.358306	5.24845e-19	down
MROH1	727957	1.74879	1.51852	1.81134	3.0935	2.71926	2.98967	-0.793455	5.28682e-19	down
DIO2	1734	0.945766	0.757845	0.918397	0.270066	0.196359	0.186729	2.00518	5.47463e-19	up
ST13	6767	160.107	158.873	162.476	187.722	192.357	188.369	-0.239624	5.56091e-19	down
CPPED1	55313	0.132148	0.109935	0.131287	0.735865	0.997374	0.512718	-2.58866	5.85799e-19	down
PPM1J	333926	0.385457	0.511998	0.427008	1.98527	1.6676	1.96562	-2.08478	5.88333e-19	down
RHOBTB2	23221	4.32754	3.87645	4.22922	2.42718	2.3908	2.30798	0.803042	5.96272e-19	up
ZNF644	84146	20.6987	20.4148	19.6306	15.1545	13.8299	13.6995	0.509053	6.34095e-19	up
RAD52	5893	9.44662	9.38392	10.3314	5.99299	6.22927	5.70365	0.702042	6.40028e-19	up
CEP295	85459	4.58927	4.783	4.43197	2.74733	2.77652	2.91279	0.710371	6.52088e-19	up
NEPRO	25871	16.7721	16.9167	16.2348	12.1386	11.265	11.534	0.514941	6.79026e-19	up
NDUFS5	4725	151.955	161.024	158.144	90.6371	109.679	92.5212	0.686007	7.0217e-19	up
KAT6B	23522	1.45072	1.38151	1.26633	0.839942	0.80728	0.757	0.769545	7.12348e-19	up
GALNT10	55568	3.4975	3.47009	3.3402	1.98497	2.06048	2.1163	0.742324	7.23254e-19	up
SRD5A1	6715	6.77887	6.98633	7.02912	9.36715	9.55299	9.8346	-0.46761	7.47819e-19	down
MRPL27	51264,64975	10.9273	9.83959	11.7983	5.7834	6.3175	5.19	0.913318	7.5434e-19	up
RAB4A-AS1		3.21734	3.08423	3.00931	5.40687	4.57611	5.38979	-0.723388	7.89742e-19	down
IRS2	8660	1.74588	1.64894	1.44619	3.21664	2.80119	3.23606	-0.934755	8.58819e-19	down
KRAS	3845	6.51124	6.41225	6.70807	10.1378	8.65415	10.3683	-0.570829	9.91122e-19	down
FAM120B	84498	10.4424	11.2096	11.1366	7.06384	7.24226	7.44566	0.592063	1.00362e-18	up
GBA	2629,2630	13.2276	12.7883	12.5644	8.35747	7.7792	8.20008	0.664726	1.02323e-18	up
C1orf21	81563	0.681826	0.751278	0.687285	1.38551	1.45054	1.3791	-0.991252	1.06342e-18	down
RUFY1	80230	7.73854	7.59633	7.61043	4.82723	4.80348	5.01109	0.648106	1.07186e-18	up
PCDH18	54510	1.48937	1.36007	1.49962	0.544928	0.545215	0.413489	1.53225	1.07502e-18	up
TRIM31	11074	2.26398	2.10557	2.30999	4.36271	4.45727	4.3663	-0.981218	1.07664e-18	down
ACSL3	2181	13.3425	13.5413	13.4006	17.0689	16.344	17.62	-0.341208	1.08058e-18	down
ZDHHC9	51114	13.4774	13.8737	13.7875	17.9459	18.6766	19.7107	-0.45349	1.14432e-18	down
NCL	4691,80331	107.289	105.284	109.202	85.6743	88.2057	84.5573	0.316237	1.17367e-18	up
CPNE7	27132	1.29515	1.47233	1.46823	3.93186	3.35327	3.27064	-1.31735	1.19858e-18	down
CASP8	841	4.87226	5.06279	4.84654	3.03549	2.98153	2.90825	0.727834	1.26575e-18	up
MMAB	326625	4.87076	4.62451	5.0136	2.59615	2.87894	2.36782	0.887473	1.31554e-18	up
CTSO	1519,1513	1.76985	2.03432	1.66604	0.833414	0.689724	0.680941	1.31142	1.34538e-18	up
BCL10	8915	11.5108	12.1309	12.6062	16.3807	19.1633	19.6652	-0.60701	1.43166e-18	down
SLC50A1	55974	16.3889	16.6609	16.8554	23.687	28.1844	24.7519	-0.618593	1.45784e-18	down
PEPD	5184	4.3218	4.3007	3.9616	2.45771	2.51476	2.58625	0.735388	1.47573e-18	up
LYRM2	57226	6.63382	6.34523	6.77807	4.28533	4.4321	4.42085	0.588596	1.53184e-18	up
CLN6	54982	6.09441	6.33494	6.50741	3.89044	3.52952	4.08599	0.718809	1.59703e-18	up
KIF3B	9371	17.7172	17.8271	18.0019	12.8888	12.807	13.2075	0.460892	1.61713e-18	up
STX11	8676	0.210281	0.173917	0.180741	0.740541	0.96166	0.778794	-2.13475	1.72933e-18	down
UNK	85451	5.35921	5.54829	5.70154	3.02343	3.31549	3.25053	0.792449	1.85346e-18	up
WNT10A	80326	4.06675	5.04291	4.12252	1.59699	1.90265	1.58943	1.37858	1.89945e-18	up
PRPF39	55015	17.1322	16.4088	17.2222	11.9433	10.9768	11.9057	0.543627	2.00483e-18	up
FOXRED2	80020	7.01834	7.83362	7.23436	4.65922	3.59221	4.15389	0.832194	2.02191e-18	up
C22orf46	79640	14.1885	15.3396	16.572	10.0268	9.66289	10.4641	0.612427	2.16031e-18	up
LRRIQ3	127255	1.53446	1.6081	1.2199	0.600528	0.509328	0.517679	1.42246	2.20557e-18	up
RETREG3	162427	9.86496	10.7381	11.4596	6.53662	6.94918	6.60922	0.674057	2.27713e-18	up
EZR	7430	92.6424	90.8158	94.2086	110.466	110.856	110.267	-0.256044	2.29725e-18	down
BICD1	636	1.18524	1.06608	1.13678	2.19095	1.88115	1.94732	-0.829154	2.30851e-18	down
HNRNPF	3185	151.787	154.068	159.206	114.32	123.606	110.028	0.418528	2.43238e-18	up
AKIRIN2	55122	17.3301	18.6173	18.3829	26.4819	26.9276	25.1537	-0.532097	2.52957e-18	down
NBN	4683,9048	6.6161	6.4569	6.99435	4.91417	4.65764	4.93493	0.468126	2.60602e-18	up
COX7C	1350	53.4195	54.4963	56.7146	33.9061	39.8332	33.3326	0.620651	2.70312e-18	up
CXorf38	159013	3.43475	3.18169	3.68061	5.38779	6.51986	5.73647	-0.776956	2.73165e-18	down
SLX4	84464	3.42614	3.57565	3.75616	2.25948	2.0781	2.11848	0.736675	2.85321e-18	up
IMPACT	55364	18.8115	18.7572	18.707	13.4181	11.8642	13.0113	0.555409	2.85618e-18	up
LRRC59	55379	30.848	30.2958	32.5336	39.4157	39.5378	42.6517	-0.376432	2.95165e-18	down
SELENBP1	8991	3.23932	3.0424	3.08048	1.16584	1.2808	0.880329	1.49264	3.04429e-18	up
ANKH	56172	2.78487	2.82541	2.73283	4.11511	3.91368	4.11406	-0.54145	3.05602e-18	down
GABPB1-AS1	100129387	1.53422	1.12669	1.52461	2.56937	2.36103	2.77268	-0.880031	3.43177e-18	down
ENSG00000279207		7.62226	8.20983	7.91754	4.8832	4.95296	5.14147	0.665095	3.7216e-18	up
MED13	9969	11.8457	11.3276	11.5986	8.36516	7.2582	8.30826	0.539006	3.72355e-18	up
ASF1A	25842	21.8652	20.9947	20.8918	13.9011	13.3936	14.3701	0.613635	3.75403e-18	up
MOV10	4343	17.6721	16.9363	17.9922	13.4264	12.9104	12.9396	0.42142	4.08537e-18	up
LANCL1	10314	19.8816	19.8247	19.328	14.2246	13.0513	14.0384	0.514914	4.09042e-18	up
ENSG00000283041		176.45	151.231	186.691	227.48	252.874	236.894	-0.479656	4.10574e-18	down
FOS	2353	3.27315	4.25061	4.2977	7.80585	8.34674	7.25438	-0.98553	4.12571e-18	down
CKAP4	10970	8.77292	10.1905	9.36078	14.6852	15.2632	13.8942	-0.630298	4.17094e-18	down
NECAP2	55707	8.23486	8.15365	8.6598	4.82201	5.54784	4.68365	0.734615	4.35383e-18	up
VPS51	738	7.20332	7.09966	7.28729	4.05686	4.30188	4.54608	0.742473	4.6042e-18	up
ENSG00000272668		0.813018	0.757753	0.806285	1.71624	1.83693	1.62189	-1.1224	4.7267e-18	down
NFKBIA	4792	71.0831	76.088	71.9134	49.3372	55.408	47.7863	0.522381	4.80603e-18	up
KLF5	688	60.6386	62.0082	61.8274	45.5498	43.0123	47.5156	0.438989	4.83851e-18	up
GPCPD1	56261	3.3038	3.40043	2.84792	6.20567	5.37105	5.12157	-0.805805	4.84685e-18	down
EHF	26298	27.8913	27.6012	27.3512	34.2318	33.631	34.4989	-0.305213	4.88419e-18	down
KRT86	3892	0.838049	0.758007	0.817875	2.70966	2.53066	2.41614	-1.66529	5.06245e-18	down
IFT46	56912	4.85465	6.60677	5.23949	2.59666	2.34183	2.43776	1.17897	5.16507e-18	up
NOP56	10528	21.3784	21.4875	21.0637	27.7151	29.538	26.9886	-0.398051	5.17426e-18	down
ZNF83	55769	4.44471	4.01179	4.07198	6.38232	6.31182	6.06201	-0.582152	5.17554e-18	down
HRK	8739	0.390586	0.477031	0.413792	1.24261	1.09156	1.28407	-1.49755	5.21229e-18	down
TRIM26	7726	19.2576	17.601	20.281	12.8456	12.4472	13.1855	0.570446	5.21315e-18	up
PCDHA11	56138	2.78077	2.17548	1.69741	0.685716	0.823167	0.571878	1.67704	5.28901e-18	up
SRSF10	10772	16.7305	16.739	17.2532	13.1707	13.0169	12.901	0.375881	5.34371e-18	up
SEMA6B	10501	1.36434	1.36257	1.62492	3.1224	2.86692	3.48559	-1.12249	5.38613e-18	down
GTF2A1	2957	14.429	14.6983	14.2125	9.95628	8.38896	9.83938	0.620787	5.4487e-18	up
DMAC2	55101	11.1924	11.823	13.0433	6.87987	7.82414	6.48351	0.767132	5.4847e-18	up
DRAM2	128338	15.727	17.3677	16.78	24.5759	26.1379	22.516	-0.554124	5.66299e-18	down
SNHG4	724102	6.58739	6.60992	6.85827	11.6759	10.2626	9.69407	-0.657409	5.69389e-18	down
TTC7A	57217	1.69577	1.56945	1.5567	2.46194	2.59008	2.60416	-0.667017	5.69613e-18	down
KMT2E	55904	7.59018	7.59897	7.47021	5.14496	4.47882	5.31552	0.600995	5.79439e-18	up
SLF2	55719	6.24479	6.10497	6.28124	4.25432	4.05421	4.14865	0.580728	5.94501e-18	up
IGFBP3	3486	97.1723	100.494	95.8414	74.358	75.7342	68.4619	0.42541	5.98827e-18	up
GATA6	2627	2.96597	2.51796	2.77612	5.55373	5.44686	4.80132	-0.935874	6.30632e-18	down
GLB1	2720	11.2787	12.0939	11.7744	16.0209	16.8068	16.237	-0.481286	6.34588e-18	down
ETV6	2120	4.38439	4.44601	4.65538	7.64043	6.32161	7.1306	-0.645301	6.47508e-18	down
SEC61A1	29927	32.6105	33.8802	33.6667	24.3134	26.5229	24.0077	0.420311	6.48922e-18	up
BCAR1	9564	5.97945	5.94479	6.03785	7.8627	8.59715	8.41402	-0.469675	6.65949e-18	down
DYNLL1	8655	61.5567	68.5895	71.9545	39.1527	47.4622	44.8404	0.620502	6.67349e-18	up
HSPD1	3329	66.2743	63.0324	67.2348	78.8308	79.7247	76.6033	-0.258802	6.89895e-18	down
MDK	4192,10305	30.605	28.0886	30.384	42.4348	44.7304	38.9423	-0.501519	6.92252e-18	down
DTX2	113878	4.119	4.74862	4.16962	7.35185	6.83464	7.35617	-0.724558	6.93565e-18	down
RBM12B	389677	9.94034	10.0387	10.6877	14.7296	12.9503	14.573	-0.46238	6.99555e-18	down
SMOX	54498	2.20113	2.2889	2.32519	4.87713	4.48339	4.58465	-1.03293	7.09937e-18	down
POMT2	29954	2.44452	2.57094	2.6015	1.54645	1.45959	1.55563	0.739654	7.11334e-18	up
MYO1B	4430	53.8625	53.9686	52.8119	65.459	63.3289	63.7349	-0.261172	7.53203e-18	down
ANKRD12	23253	5.75412	5.72714	5.43547	3.64241	2.47972	2.82379	0.919149	7.58917e-18	up
LUZP1	7798	5.44642	5.8159	5.89252	7.92438	7.76977	8.54572	-0.498766	7.64051e-18	down
COQ7	10229	9.83215	10.1727	11.0137	5.09597	6.41566	5.95032	0.828915	7.83478e-18	up
HOXD11	3237	0.707939	0.554479	0.554978	2.03043	2.74645	2.80644	-2.06096	7.8395e-18	down
TNFRSF9	3604	0.282932	0.376343	0.287171	1.08347	1.19663	0.941011	-1.76696	7.85791e-18	down
RAD51	5888	7.08762	6.90424	7.13031	10.4512	11.7063	11.3955	-0.667681	8.13879e-18	down
WTAP	9589	25.4414	24.6203	23.76	18.0764	18.3153	17.6312	0.450473	8.72889e-18	up
RPL9	6133	25.2692	22.7896	22.4357	34.7243	36.1345	30.3866	-0.522274	8.78779e-18	down
DNAJC30	84277	5.65353	5.34911	6.04269	2.28691	2.53216	2.77222	1.16696	9.38003e-18	up
BTF3	689,10384	56.0339	53.7977	55.0887	66.2015	70.6501	66.3587	-0.301205	9.63312e-18	down
GSKIP	51527	14.7093	15.9209	16.0979	10.2684	10.634	10.6457	0.566737	9.79313e-18	up
RRAS	6237	8.3877	8.19541	9.05811	14.9101	17.8294	17.3251	-0.965328	9.87753e-18	down
RTKN2	219790	1.55811	1.5925	1.58812	0.81187	0.678149	0.727032	1.09586	9.92872e-18	up
C5orf22	55322	9.01023	9.55062	8.60871	13.8623	12.8827	14.5883	-0.605314	1.00196e-17	down
HADHA	3030	39.3136	40.6232	38.5211	49.7417	50.2046	49.3247	-0.333559	1.05407e-17	down
ACSF3	197322	1.66317	1.86872	1.77386	0.945255	0.904841	1.02022	0.886345	1.06005e-17	up
EFTUD2	9343	20.3236	20.3252	21.449	14.934	15.7559	15.9437	0.413172	1.07327e-17	up
BLACAT1	101669762	0.596115	0.52174	0.664435	1.4129	1.4279	1.62568	-1.3254	1.16198e-17	down
SLCO1B3	28234	11.4914	10.7497	10.5076	16.683	15.6958	15.4915	-0.547696	1.17816e-17	down
FBXO33	254170	4.29634	4.15619	3.5212	7.29511	7.02136	7.07712	-0.837306	1.23897e-17	down
IDO1	3620	2.37988	2.18498	1.91679	0.584368	0.228887	0.482065	2.32305	1.24439e-17	up
ID1	3397	235.292	225.6	249.445	304.828	331.407	289.593	-0.382242	1.29316e-17	down
ZFAND1	79752	13.9251	14.0907	15.2617	20.047	20.2409	18.9706	-0.453406	1.32928e-17	down
CD63	967	76.3644	75.6229	79.3087	94.5389	96.9273	92.7344	-0.29717	1.37141e-17	down
TRIP12	9320	21.8926	21.8374	21.9643	16.8161	16.3131	17.3815	0.379182	1.37658e-17	up
MBP	4155,4153,5553	1.95553	1.91538	2.03453	2.87888	2.73067	2.7974	-0.509539	1.38398e-17	down
NECTIN4	81607	5.28744	5.62011	5.66934	9.03392	8.64938	8.70519	-0.670737	1.42718e-17	down
ALCAM	214	53.3685	52.8975	52.7085	64.558	62.1905	63.5632	-0.25957	1.51564e-17	down
RBM6	10180	12.5884	11.6148	12.853	8.68452	8.14172	8.77114	0.533718	1.53e-17	up
RIN1	9610	1.62636	1.6393	1.50847	3.11033	3.28387	2.90955	-0.962574	1.55321e-17	down
GANAB	23193	68.6447	65.1556	69.8377	53.0471	52.9813	53.6862	0.35051	1.62948e-17	up
IPP	3652	9.49253	8.83054	8.82409	5.44475	5.57013	5.316	0.733198	1.65409e-17	up
ZC3H13	23091	10.4438	10.4998	10.1835	7.44328	6.98918	7.5823	0.4997	1.70208e-17	up
ZNF76	7629	7.95306	7.84965	8.4061	5.4054	5.38221	5.46536	0.574828	1.7038e-17	up
PCM1	5108,4152	7.57787	7.27171	7.13962	5.39192	4.87927	5.05242	0.521039	1.74548e-17	up
HOXD9	3235	0.339473	0.214569	0.311125	2.38486	1.444	1.88772	-2.7241	1.7576e-17	down
CYSRT1	375791	7.65574	6.84893	8.09498	13.6541	16.9042	14.3393	-0.990335	1.81218e-17	down
TMEM216	51259	16.4233	18.5033	18.1235	9.24236	10.8552	9.60635	0.836704	1.8455e-17	up
PCK2	5106	22.3717	22.254	23.2038	28.3479	29.6589	29.0872	-0.36066	1.89412e-17	down
STXBP5	134957	4.15434	3.92831	3.98176	2.55158	2.25692	2.55914	0.711483	1.89577e-17	up
UST	10090	3.14646	3.55352	3.35222	6.0124	5.47649	5.53213	-0.759806	1.91315e-17	down
FBXL3	26224	8.04405	8.24268	8.28608	5.57491	5.27855	5.62796	0.576223	1.91913e-17	up
BCAS2	10286	70.4903	65.3236	67.3863	46.6344	49.0504	45.7061	0.523214	1.95089e-17	up
C11orf58	10944	19.0843	18.742	19.7357	15.1137	14.3814	14.3822	0.391642	1.99166e-17	up
SZT2	23334	4.14256	4.45515	4.71508	3.1026	3.14024	3.15028	0.503137	2.06762e-17	up
GSN	2934	2.20394	2.07949	2.15088	3.2262	3.48133	3.2159	-0.625052	2.11177e-17	down
CTSH	1512	3.10419	3.13746	2.9062	4.43097	5.6055	4.64061	-0.682061	2.18146e-17	down
OASL	8638	17.6568	16.193	17.6269	21.8492	23.68	22.2899	-0.397771	2.1838e-17	down
RAC2	5880	16.7668	18.5429	19.4662	25.9576	27.9776	25.9077	-0.543623	2.18533e-17	down
APOL2	23780	9.84394	9.65655	10.4048	6.27098	5.38534	5.89195	0.769072	2.26466e-17	up
ZNF469	84627	1.98943	2.02952	2.37836	1.10853	0.967271	1.22287	0.955581	2.29984e-17	up
ABCA13	154664	0.422929	0.318899	0.340721	0.989669	0.743684	0.803022	-1.22834	2.33514e-17	down
MAP1LC3B	81631	6.27558	6.37751	6.99176	9.69335	9.36722	9.692	-0.549539	2.35233e-17	down
ABCF3	55324	9.9123	10.2436	9.90653	6.66673	6.68916	6.14364	0.624523	2.55557e-17	up
BORCS8	729991	1.6897	1.15839	1.55541	0.43666	0.479133	0.396593	1.74646	2.70856e-17	up
ZFYVE26	23503	4.33128	3.86568	3.85331	2.56808	2.36799	2.67971	0.662002	2.84346e-17	up
RAB11B	9230,339122	45.8307	43.2217	41.4444	28.0098	31.3172	27.6941	0.584578	2.88363e-17	up
NBPF1	55672	4.74649	4.71255	5.37019	3.28642	3.26287	3.19832	0.605324	2.93048e-17	up
CKB	1152,1120	2.88527	2.51626	2.66525	5.54742	5.85901	5.37439	-1.05675	2.96582e-17	down
SGMS1-AS1	104355295	0.832152	0.93215	0.743989	0.235891	0.273414	0.358831	1.53071	3.21765e-17	up
GNS	2799	21.2435	21.5519	22.505	28.9487	26.6362	27.7858	-0.352449	3.28974e-17	down
THOC1	9984	6.78472	6.93993	6.65171	4.33261	4.45304	4.63817	0.602101	3.29479e-17	up
PDZK1IP1	10158	8.74233	5.98217	8.91818	16.3183	19.5414	15.8513	-1.12908	3.40822e-17	down
RNF34	80196	13.6724	13.5467	13.9278	9.20388	9.73161	8.71643	0.573408	3.41193e-17	up
CYP7B1	9420	0.868587	1.00336	0.921156	0.247029	0.0705784	0.127714	2.64895	3.43353e-17	up
LINC00665	100506930	4.00938	4.43933	4.32309	2.85604	2.60925	2.64756	0.654683	3.48015e-17	up
SLC24A1	9187	2.59771	2.58114	2.78394	1.5365	1.51232	1.4383	0.827486	3.50574e-17	up
LHFPL5	222662	0.926021	0.797754	0.930114	1.92417	1.862	1.71829	-1.05249	3.55831e-17	down
TRPM7	54822	7.91212	7.72401	7.68075	5.6418	5.0942	5.53944	0.518678	3.66978e-17	up
CDH5	1003	4.12771	3.90736	3.633	1.971	1.96344	2.21282	0.92455	3.76301e-17	up
COA3	28958	18.9328	17.6818	18.419	11.1993	11.0237	11.6841	0.698729	3.84172e-17	up
TTLL12	23170	22.9161	23.5058	22.6	29.1078	29.8609	29.5161	-0.358376	3.85105e-17	down
CBWD1	55871	3.9696	3.95219	4.45118	2.69561	2.78897	2.67735	0.600209	3.92326e-17	up
SPTAN1	6709	5.46539	5.41308	5.69029	4.05633	3.56729	3.78948	0.537776	4.01572e-17	up
MT-TS2		156.618	141.389	174.741	61.3128	50.7019	60.3987	1.4552	4.06097e-17	up
IDH1	3417	40.2213	38.5267	39.4333	48.8881	49.8254	47.2507	-0.304613	4.0999e-17	down
SLC9A7	84679	2.86736	2.81074	2.58418	4.28717	4.08429	4.25668	-0.61203	4.12493e-17	down
ARGLU1	55082	64.4461	63.8889	64.9419	76.7403	76.3481	74.9985	-0.238914	4.13773e-17	down
GAN	8139	1.70245	1.47465	1.72388	3.04534	2.40265	2.87644	-0.764279	4.28094e-17	down
SRRM1	10250	16.3162	15.6993	15.7547	20.062	19.7922	20.836	-0.345353	4.29806e-17	down
MAOA	4128	0.0577093	0.0487698	0.0480078	0.242971	0.29575	0.264177	-2.37773	4.73465e-17	down
KLF10	7071	54.5663	55.907	53.5601	67.9515	70.0947	66.4594	-0.31815	4.86679e-17	down
TCIRG1	10312	14.0652	15.7917	15.5719	21.4407	22.2274	20.038	-0.487825	4.89592e-17	down
HEXB	3074	15.4628	15.8688	15.8351	20.435	22.9406	20.7635	-0.443437	4.95036e-17	down
TBC1D4	9882	2.41505	2.23994	2.27528	3.69162	3.66189	3.63313	-0.664768	4.96535e-17	down
SHPK	23729	5.05299	4.46214	4.66362	2.1737	2.00852	2.51927	1.08118	4.99964e-17	up
TMTC2	160335	1.28526	1.10301	1.1535	2.08182	2.30501	2.32159	-0.921501	5.00109e-17	down
MYO1D	4642	5.46807	4.93956	5.30331	7.8118	7.12014	8.18422	-0.557132	5.00346e-17	down
OGFOD3	79701	6.63634	6.25508	7.89663	3.83102	3.90029	4.25087	0.794863	5.20487e-17	up
STK33	65975	1.56622	1.4741	1.31448	0.638843	0.49626	0.543834	1.37506	5.23797e-17	up
LOXL1-AS1	100287616	0.162911	0.182856	0.164649	0.77744	0.864698	0.646389	-2.16467	5.25052e-17	down
PTGES	9536	27.7255	26.3359	31.6348	40.1667	43.2222	40.5985	-0.53289	5.26516e-17	down
GNPTAB	79158	7.54592	7.13779	7.34312	5.29042	4.98335	4.9381	0.534064	5.29425e-17	up
SAMD8	142891	10.198	10.2887	9.73906	14.3352	12.987	13.9353	-0.448879	5.34837e-17	down
IQSEC1	9922	1.33134	1.24048	1.27767	2.37209	2.10644	2.19177	-0.793085	5.48874e-17	down
CHMP1A	5119	15.4676	14.9877	16.0724	11.2513	11.5799	11.3929	0.44308	5.51501e-17	up
TRIM66	9866	2.30086	2.43631	2.40086	1.32564	1.29959	1.45581	0.806588	5.81668e-17	up
OMA1	115209	11.9553	13.3743	12.5671	8.02761	8.11265	7.32907	0.691295	5.83206e-17	up
DRAP1	10589	82.1651	81.6233	87.2076	102.445	116.74	112.608	-0.402619	6.11958e-17	down
NAGS	162417	1.61263	1.5721	1.8347	4.07252	4.5211	3.47892	-1.26613	6.12947e-17	down
ATPAF1	64756	15.8933	16.2025	16.9059	10.9427	12.0915	10.9101	0.529665	6.25081e-17	up
POLQ	10721,51426	10.2053	10.2574	10.7026	7.71279	6.74049	6.69835	0.559168	6.48826e-17	up
ESPL1	9700	9.34868	9.52979	9.23462	6.60868	6.79723	6.43976	0.502418	6.72721e-17	up
RNF44	22838	5.91411	5.58776	5.70978	9.15496	7.928	9.16979	-0.609082	6.72853e-17	down
SLC11A2	4891	8.01204	8.28342	8.14187	10.7163	10.7817	10.3393	-0.38163	6.8248e-17	down
GID8	54994	29.2815	28.6381	29.2815	22.2905	21.4393	20.455	0.442113	6.82765e-17	up
LRRCC1	85444	7.09593	7.26663	6.35234	4.04958	3.65735	4.11142	0.809641	6.85919e-17	up
LSM8	51691	3.03913	2.96334	3.19748	2.10518	1.73509	1.74499	0.72	6.86815e-17	up
TSPAN18	90139	0.26355	0.236272	0.225891	0.830598	0.870115	0.852282	-1.81472	6.91003e-17	down
WDR6	11180	20.7625	19.3553	21.9598	13.9646	15.1745	14.324	0.514281	6.96934e-17	up
ENSG00000255639		0	8.72507e-07	0	0.898767	1.49651	1.96822	-22.2538	7.21489e-17	down
CUEDC1	404093	7.7379	7.54713	7.20635	4.74167	4.78954	4.81109	0.649096	7.22934e-17	up
CLCA2	9635	1.06285	1.25852	1.15293	2.62688	2.57019	2.5091	-1.14929	7.25917e-17	down
MAP4K2	5871	0.958692	1.08101	0.944129	1.99278	1.95928	1.95039	-0.984149	7.25961e-17	down
SEMA4A	64218	6.83704	7.58244	7.29266	4.57339	4.79788	4.35594	0.661463	7.4635e-17	up
CMTR1	23070	18.7628	17.6356	18.4868	12.435	13.3415	13.2203	0.493061	7.50677e-17	up
KTN1	3895	29.8182	29.8504	28.8233	22.8713	18.4306	20.2672	0.52334	7.68315e-17	up
MCRS1	10445	20.1396	19.3136	20.3526	13.145	14.1689	12.3803	0.591354	7.72865e-17	up
FXR1	8087	23.0809	22.0679	22.3473	27.1336	26.9914	27.2496	-0.269775	8.0202e-17	down
HADHB	3032	27.6613	27.8734	29.6867	35.8934	38.9543	35.7785	-0.376405	8.02296e-17	down
UBB	7314	469.322	460.748	478.414	336.539	381.513	342.301	0.409599	8.81763e-17	up
ITGB4	3691	37.504	36.8182	37.5264	47.1673	44.295	49.4212	-0.332955	8.97991e-17	down
ANXA3	306	16.7426	16.9714	16.3575	22.2655	23.499	21.2558	-0.420606	9.02376e-17	down
NDST2	8509	4.63943	3.62863	5.23083	2.24317	1.83262	1.80734	1.19818	9.26054e-17	up
ATP2A2	488	51.3728	51.7901	52.4973	62.5139	59.5656	63.4805	-0.253486	9.32284e-17	down
NFIL3	4783	4.85604	4.94123	5.14137	9.67026	9.6241	8.30578	-0.885627	9.55003e-17	down
SH3BGRL2	83699	1.44507	1.67212	1.72934	3.50671	3.32076	3.0387	-1.02554	9.56825e-17	down
GAL	51083	6.83065	6.77614	7.51926	14.0048	13.6071	12.2291	-0.915234	9.73421e-17	down
CCDC171	203238	1.09173	1.09909	1.01862	0.347289	0.488886	0.450624	1.31853	9.81448e-17	up
AKT2	208	12.3515	13.0747	13.5469	9.3929	10.0303	9.12949	0.448852	1.00854e-16	up
BIK	638	13.0197	12.171	11.9724	22.9258	25.6593	20.5245	-0.895014	1.0242e-16	down
BRPF3	27154	7.79523	7.82158	7.97662	4.75914	4.91766	5.44383	0.641867	1.02699e-16	up
HS6ST1	9394	9.37973	10.365	9.74612	5.84974	6.28331	6.44458	0.6667	1.04061e-16	up
ZNF774	342132	1.61667	1.68463	1.59339	0.817248	0.752148	0.710274	1.1024	1.08283e-16	up
TRIM14	9830	22.2179	22.6834	22.8662	16.7026	16.4149	17.1703	0.430384	1.13939e-16	up
PAGR1	79447	20.3274	20.4849	20.6871	12.7133	14.8912	12.6386	0.611831	1.14057e-16	up
TPM3	7170	22.6029	23.3183	23.2559	27.5089	29.8597	27.9423	-0.302436	1.1447e-16	down
DYNC1I2	1781	12.3786	12.1227	11.648	15.8807	15.9312	15.726	-0.395113	1.16592e-16	down
ENSG00000280138		0.240658	0.244601	0.327303	0.829267	0.557373	0.77125	-1.40907	1.18235e-16	down
SMAD1	4086,2617	5.63405	5.49599	5.25636	3.54377	3.37416	3.22548	0.691957	1.20209e-16	up
DLGAP5	9787	30.1386	29.1487	30.6889	22.3458	22.1518	22.2196	0.431483	1.21616e-16	up
TOP2A	7153	94.0115	91.3252	87.0494	70.0543	65.7318	70.6204	0.400165	1.27485e-16	up
SCPEP1	59342	36.0313	36.7021	36.7819	27.8679	27.4312	25.8524	0.432444	1.30298e-16	up
DNAH5	1767	0.192007	0.155326	0.139446	0.450057	0.368237	0.456738	-1.3892	1.30609e-16	down
PEF1	553115	21.1842	21.5059	21.3074	13.8475	14.2049	12.2368	0.66762	1.31422e-16	up
RFWD3	55159	16.0794	16.3473	16.3564	20.2538	20.6139	20.512	-0.331381	1.41427e-16	down
FYN	2534	2.0922	2.08716	2.21988	3.55796	3.32708	3.54469	-0.704727	1.47543e-16	down
USP11	8237	11.6268	10.9541	11.921	8.06539	7.70294	7.59859	0.562208	1.50092e-16	up
ARID2	196528	7.21899	7.59407	7.24337	5.079	4.4008	5.14084	0.593193	1.52868e-16	up
TRRAP	8295	8.92468	9.07496	8.67366	6.60543	5.82049	6.54391	0.49169	1.57131e-16	up
ZNF362	149076	11.7613	13.2197	12.3805	5.85991	7.07398	7.67934	0.857983	1.64743e-16	up
SIRT3	23410	4.50504	4.62614	4.79963	2.61103	2.69177	2.78796	0.783933	1.66886e-16	up
THAP9-AS1	100499177	9.08999	8.85822	10.2651	13.4814	13.5627	13.3298	-0.517044	1.68985e-16	down
SAMD15	161394	2.44214	2.09802	2.01599	0.582347	0.573887	0.265538	2.20516	1.77934e-16	up
ADD1	118	11.2962	11.0082	11.3913	8.26336	8.07383	8.71687	0.427519	1.79388e-16	up
CHD7	55636	2.16409	1.98288	2.26987	3.20512	2.9191	3.24059	-0.545384	1.79793e-16	down
SEMA3C	10512	31.5009	33.7888	32.7458	23.9826	22.814	25.0457	0.448473	1.83543e-16	up
WDR72	256764	7.0372	6.93035	6.9826	9.08659	9.27245	9.31324	-0.40148	1.86345e-16	down
SMTNL1	219537	0.217554	0.299695	0.199629	1.68201	1.76091	1.47222	-2.77744	1.89779e-16	down
GOLGA1	2800	11.833	11.3389	10.724	7.56264	7.80491	7.52787	0.566053	1.90327e-16	up
RBM5	10181	14.7058	15.0372	14.6552	11.1585	11.3013	10.5574	0.42728	2.08237e-16	up
DDX21	9188,54606	36.0443	35.9753	35.4033	42.668	42.4013	43.6376	-0.260788	2.09707e-16	down
NHLRC3	387921	3.98324	3.5318	3.99056	6.33882	5.82565	5.69792	-0.634588	2.1435e-16	down
C1QTNF6	114904	10.9221	10.8035	11.2092	7.74556	7.99891	7.21817	0.520326	2.20336e-16	up
RNASE7	84659	2.22379	2.15283	1.99427	5.64971	5.45918	5.33952	-1.36838	2.22106e-16	down
DUSP16	80824	3.08968	3.17964	3.12318	5.07944	4.65933	4.68956	-0.619324	2.26253e-16	down
IL13RA1	3597	10.5213	9.61404	10.7905	16.1685	13.6954	15.7853	-0.561777	2.32125e-16	down
SPRED2	200734	3.36825	3.61479	3.52548	5.25919	5.92692	5.68052	-0.682612	2.34459e-16	down
MTMR2	8898	6.03543	5.73455	5.6615	4.15025	4.10951	4.05622	0.501163	2.39813e-16	up
ATL3	25923	3.06411	2.89741	3.27789	5.10988	4.45499	5.02695	-0.659285	2.43612e-16	down
PITPNB	23760	35.3663	35.0293	35.498	26.8067	27.6051	27.3018	0.373967	2.47036e-16	up
QPCTL	54814	1.44533	1.39375	1.20937	3.18776	3.34484	3.24615	-1.27228	2.47344e-16	down
MAP3K20	51776	3.2134	2.78585	3.10763	4.60778	4.15743	4.57166	-0.550391	2.4894e-16	down
ACAA1	30	4.57167	4.52615	4.64202	6.3753	6.89547	6.50912	-0.52567	2.50663e-16	down
WNT2B	7482	0.23762	0.209317	0.260769	0.629369	0.59085	0.641639	-1.39552	2.51332e-16	down
SMG6	23293	3.63055	3.36868	3.55132	2.21197	1.96462	2.23547	0.718459	2.62726e-16	up
CGGBP1	8545	10.6574	11.2469	10.7426	7.62785	7.62762	7.04477	0.549885	2.67628e-16	up
HSPA5	3309	117.341	118.41	118.792	138.6	143.9	135.913	-0.238966	2.70466e-16	down
TM7SF3	51768	12.7326	12.6879	13.1483	16.6685	17.0188	16.3649	-0.375996	2.71123e-16	down
MARCKS	4082	15.9748	16.4922	15.7165	21.0877	21.2749	21.1639	-0.398818	2.73963e-16	down
SLC17A5	26503	3.84718	3.51484	3.59822	6.71536	5.85395	6.90991	-0.829657	2.8723e-16	down
PAPPA2	60676	0.236741	0.242215	0.285734	0.69055	0.635805	0.741384	-1.43511	2.88572e-16	down
EXOC4	60412	5.99623	6.30378	6.06367	8.40237	8.19218	8.07772	-0.426035	3.03131e-16	down
UBE2Z	65264	31.9657	32.3388	32.8637	24.2557	25.6179	24.1728	0.392053	3.10924e-16	up
ATP2B1	490	6.59119	6.79004	6.56242	4.31461	4.57369	4.65794	0.558037	3.12127e-16	up
MTHFSD	64779	6.6754	6.26699	6.54231	4.34507	4.24093	4.24179	0.603067	3.18765e-16	up
JMJD8	339123	10.7308	9.27527	11.0372	4.1613	4.94825	5.90057	1.04834	3.21674e-16	up
CRIP2	1397	0.300471	0.30957	0.224031	1.26494	1.43613	0.914341	-2.11592	3.23816e-16	down
C12orf56	115749	0.793407	0.794394	0.740869	0.192508	0.157091	0.162369	2.18538	3.39495e-16	up
CTNND1	1500,100528016	45.4322	46.6199	45.8234	54.0033	53.5565	55.6013	-0.242931	3.41336e-16	down
CAVIN2	8436	4.05238	4.25485	4.07926	1.9484	1.80718	1.43218	1.25558	3.41701e-16	up
SLC22A23	63027	2.36386	2.79284	2.57258	4.25149	3.9464	4.12533	-0.672971	3.50731e-16	down
KRT7	3855	9.13502	8.58881	9.48462	12.601	13.1532	12.7582	-0.501269	3.60832e-16	down
TAF6L	10629	4.63739	4.82662	4.52351	2.30341	2.3478	2.15538	1.03913	3.62966e-16	up
SH3RF2	153769	1.94672	2.11689	2.16334	3.5598	3.34912	3.38097	-0.724631	3.66778e-16	down
LRRC41	10489	15.2404	16.1207	15.8113	10.8869	11.3165	11.9231	0.467046	3.77719e-16	up
SNHG3	8420	6.79756	6.61067	6.54911	10.076	10.4175	9.35527	-0.580753	3.92971e-16	down
ITGB5	3693	1.98613	2.00176	2.14789	3.61213	3.24608	3.54511	-0.761726	4.17556e-16	down
HAGHL	84264	0.339665	0.318005	0.575368	1.30357	1.38703	1.60894	-1.80197	4.17654e-16	down
APEX2	27301	14.5108	14.4195	15.5373	9.40922	10.0082	8.42265	0.675594	4.20831e-16	up
ZNF512	84450	10.548	9.34533	10.353	6.33031	6.69574	6.0608	0.664179	4.26946e-16	up
AKR1C1	1645	6.96136	6.8406	6.8791	4.54929	4.84089	4.11601	0.61469	4.38465e-16	up
STXBP3	6814	16.9199	16.371	16.9987	11.9445	12.1299	12.6126	0.454988	4.4429e-16	up
LRR1	122769	15.2515	14.4317	15.0745	9.00024	9.59349	8.09135	0.746102	4.52819e-16	up
ZNRF1	84937	1.50939	1.6901	1.65758	2.68612	3.04243	2.64569	-0.785873	4.55624e-16	down
C6orf47	57827	10.9704	10.0909	10.6203	6.36246	6.08387	6.19024	0.765509	4.6073e-16	up
AGL	178	9.37779	8.65063	8.4637	5.71709	5.39069	6.20152	0.614016	4.66804e-16	up
MAP7D1	55700	13.2493	13.4555	12.152	17.8784	18.4637	17.1789	-0.461939	4.67459e-16	down
MTG1	92170	8.17265	7.29835	8.13276	4.91124	5.08277	4.33948	0.719626	4.77274e-16	up
NUDT16	131870	8.26622	7.89646	8.15807	5.24261	4.66914	5.58866	0.64988	4.79775e-16	up
MIRLET7IHG	120766144	1.17171	1.15912	1.17215	0.511949	0.49263	0.509106	1.21052	4.90678e-16	up
ZZZ3	26009	12.1423	11.5811	11.774	8.9481	8.44764	8.1061	0.477112	5.06174e-16	up
FOXO1	2308	1.2577	1.27981	1.15411	2.59637	2.3151	2.37286	-0.980545	5.07067e-16	down
ZC3H7B	23264	22.3383	22.5526	24.0171	17.6419	17.655	18.0974	0.367984	5.08171e-16	up
ZNF664	144348	50.8121	49.8961	50.2861	39.2659	38.4735	40.6632	0.350793	5.1312e-16	up
FYB1	2533	0.531325	0.630376	0.694647	1.36859	1.28789	1.44787	-1.14468	5.37722e-16	down
PLEKHF1	79156	0.538804	0.478163	0.539873	1.64414	2.1296	2.48933	-2.00825	5.59276e-16	down
ACADM	34	10.8279	10.7669	10.8297	7.91262	8.39564	8.1652	0.405866	5.63279e-16	up
IL6R	3570	1.19411	1.04534	1.01722	2.20412	2.04579	2.13381	-0.970998	5.63843e-16	down
HMGN1	3150	33.7081	33.1197	33.1032	41.8473	41.7283	39.6258	-0.302014	5.6522e-16	down
DOCK1	1793	10.0132	9.33544	9.61471	7.00208	5.92264	6.32895	0.589097	5.66268e-16	up
NAT8L	339983	1.37566	1.25565	1.37526	2.54451	2.39348	2.62357	-0.916316	5.79824e-16	down
GGH	8836	5.9235	6.421	6.11256	4.31753	4.10163	3.80774	0.594113	5.80598e-16	up
KIF21A	55605	5.57945	4.93329	5.33753	3.37268	3.32176	3.60995	0.621249	5.96012e-16	up
TSPAN13	27075	10.6626	10.4758	11.3114	16.0141	16.5241	16.6377	-0.599741	6.02236e-16	down
WIPI1	55062	1.29059	1.41145	1.46509	3.45684	3.63231	2.741	-1.23816	6.12863e-16	down
BDKRB1	623	0.69276	0.850661	1.25607	3.27954	2.98649	3.07726	-1.73877	6.17799e-16	down
ABCG1	9619	1.73055	1.79443	1.79926	3.3025	3.23325	2.90547	-0.8264	6.1969e-16	down
DOP1A	23033	10.0224	9.00658	10.179	6.84028	6.18903	6.94436	0.548268	6.38448e-16	up
NFYC	4802	12.4648	12.0957	12.0691	8.61898	8.85326	8.46148	0.498181	6.63181e-16	up
ATXN1-AS1	101928433	0.369237	0.367187	0.518423	2.00343	1.58647	1.90487	-2.13055	6.63397e-16	down
TM4SF19	116211	1.09654	1.24203	0.794931	3.8418	3.38729	3.17653	-1.73151	6.66459e-16	down
NPM1	4869	77.4352	73.0906	76.8839	90.2598	99.2146	90.3453	-0.299204	6.79304e-16	down
PLD3	23646	7.28689	7.79951	7.90208	5.21571	5.63626	5.5102	0.490546	6.79495e-16	up
FGF2	2247,2258	2.3365	2.4149	2.76586	4.26288	3.89676	4.32412	-0.731774	6.79747e-16	down
FKTN	2218	2.71496	2.63536	2.82239	1.75176	1.47837	1.82478	0.693131	6.92185e-16	up
ST8SIA4	7903	0.427676	0.474109	0.409214	0.0741119	0.0893879	0.0879912	2.38209	6.93553e-16	up
RASA4B	100271927	0.352133	0.42213	0.398495	0.924451	1.10197	1.22296	-1.47026	7.00993e-16	down
APPL2	55198,334	7.75958	7.1981	7.10942	4.58734	4.70155	4.57841	0.670211	7.01489e-16	up
FOXD2-AS1	84793	1.00438	1.41068	1.69981	4.25708	3.43592	4.16226	-1.52661	7.16611e-16	down
RAB25	57111	40.8936	38.9882	40.1749	57.9371	61.6113	50.8677	-0.505345	7.32628e-16	down
CRACDL	343990	3.3721	3.42398	3.89536	1.76536	1.37039	1.78359	1.11992	7.46865e-16	up
TUBG1	7283	17.2712	17.0597	17.5664	12.6865	12.365	12.1798	0.479138	7.50286e-16	up
SEC13	6396	12.7352	12.2352	13.2343	16.1191	17.7495	17.856	-0.437102	7.55433e-16	down
CAMK2N1	55450	2.48801	3.50216	3.02937	5.91684	6.58369	6.79382	-1.09705	7.60908e-16	down
PIGA	5277	2.87424	3.00584	2.71035	4.95389	4.42771	4.60306	-0.703042	7.8697e-16	down
RNF145	153830	28.9839	30.1212	30.7477	21.9543	21.9025	23.0533	0.425338	7.92634e-16	up
GTF3A	2971	6.76313	7.6675	6.21793	11.5265	11.0603	12.0088	-0.744545	7.94717e-16	down
SLC16A5	9121	10.8876	11.5584	12.0905	6.87778	7.29617	7.27235	0.687394	8.03883e-16	up
CDC27	996	27.2142	26.3339	27.0843	19.4345	17.3082	20.4432	0.495699	8.04569e-16	up
PPM1G	5496	33.8568	35.9559	34.6217	25.3764	26.4141	25.6314	0.431785	8.21286e-16	up
CDK12	51755	9.44487	9.24199	9.57309	6.58323	6.90452	7.17052	0.452039	8.39098e-16	up
GABBR1	2550,10537	1.38464	1.72238	1.52158	3.09981	2.60107	2.8111	-0.878919	8.42912e-16	down
MTAP	4507	3.8831	3.77801	4.18153	5.45907	5.23177	5.20833	-0.42496	8.50778e-16	down
POGZ	23126,4864	12.4257	12.2065	12.649	9.3158	8.54989	9.5143	0.445327	8.57837e-16	up
VDAC2P5	729317	28.8825	26.5457	29.6204	42.4268	44.4837	41.0362	-0.589183	8.6979e-16	down
PRSS21	10942	22.4407	21.2901	24.84	33.3192	34.8992	30.9001	-0.531562	8.71198e-16	down
PLCB3	5331	11.081	11.9064	11.8293	15.5956	15.9228	15.2673	-0.426285	8.87389e-16	down
RABGGTB	5876	24.1227	24.1285	24.9079	29.7056	31.3316	29.5977	-0.309031	9.79807e-16	down
YPEL3	83719	2.42355	2.20587	2.37765	4.48234	5.19976	4.29347	-0.996023	9.94587e-16	down
ACTG1	71	741.043	730.064	774.679	877.964	864.236	935.684	-0.253874	1.0086e-15	down
KRT3	3850	1.05434	1.07158	1.00517	0.144876	0.10651	0.138973	3.00379	1.02559e-15	up
GUF1	60558	18.9832	17.9307	18.9986	12.5873	11.4319	13.5241	0.574619	1.0267e-15	up
SEPTIN10	151011	14.0572	15.1159	14.5179	19.8133	20.0712	18.8863	-0.427767	1.03141e-15	down
CCT4	10575	93.2507	93.1418	96.4572	114.783	113.418	109.716	-0.256636	1.036e-15	down
HIVEP2	3097	4.68404	4.49713	4.5723	6.55699	5.94918	6.66911	-0.479452	1.06724e-15	down
ST6GALNAC2	10610	4.06676	4.35501	4.87234	2.11228	2.08828	1.99357	1.10182	1.07256e-15	up
MANEA	79694	4.10592	4.27404	4.36676	2.49711	2.49052	2.90765	0.691063	1.07864e-15	up
RPL22L1	200916	4.52917	4.22906	4.89646	8.24109	9.82258	8.08572	-0.937381	1.10906e-15	down
TAF2	6873	11.2547	10.7	10.8282	8.41768	7.68406	8.26618	0.427961	1.11399e-15	up
WDR73	84942	4.9273	4.79249	5.15814	3.20991	3.4159	2.9899	0.629707	1.117e-15	up
TFPI	7035	0.0903567	0.0945327	0.0774085	0.322067	0.350267	0.381789	-2.00677	1.12293e-15	down
FGFR1OP2	26127	8.47658	8.92228	8.08931	12.121	11.409	12.384	-0.494717	1.13256e-15	down
DGCR6L	85359	18.2369	18.5948	18.0384	9.20385	8.75881	10.8521	0.929211	1.14262e-15	up
PCNT	5116	5.82134	5.73292	5.77707	4.35929	4.15341	4.27667	0.438438	1.14263e-15	up
PSMA3-AS1	379025	6.73641	6.72884	6.72392	4.45418	4.3475	4.70054	0.580385	1.16828e-15	up
PHF21A	51317	1.82458	1.75239	1.73998	2.62914	2.33716	2.54811	-0.499059	1.17565e-15	down
ENSG00000289517		5.39924	4.5178	6.50222	2.83461	2.68366	2.52365	1.02978	1.17577e-15	up
SERPINA1	5265	1.70606	1.66877	1.92607	3.11111	3.53013	3.33606	-0.912412	1.2014e-15	down
RNF216	54476	5.65563	5.55181	5.77119	7.86879	7.68067	7.52778	-0.44275	1.20612e-15	down
MYO5C	55930	4.37914	4.87193	4.81953	2.87372	3.15893	2.93756	0.649471	1.23167e-15	up
INF2	64423	3.60709	3.96005	3.98981	5.57202	5.29639	5.13736	-0.469832	1.23299e-15	down
DEPDC5	9681	1.46785	1.48203	1.58396	0.935076	0.887913	0.88938	0.741178	1.29875e-15	up
NINL	22981	5.61072	5.34603	5.62693	3.6007	3.44847	3.30407	0.679681	1.30026e-15	up
FOXC1	2296	2.24089	2.48294	2.1863	4.07018	4.54556	4.28894	-0.901107	1.307e-15	down
ACIN1	22985	33.1299	31.6183	33.4417	25.8504	25.074	26.2812	0.34687	1.31287e-15	up
TTBK2	146057	4.68766	4.74992	4.45681	7.25856	6.06653	7.61966	-0.592087	1.31899e-15	down
CARHSP1	23589	6.43565	5.5622	6.43299	9.30758	8.93447	8.76165	-0.551035	1.33311e-15	down
LRRC37A3	374819	0.932418	1.05639	1.29128	0.435976	0.341117	0.33658	1.55841	1.34425e-15	up
MARCHF6	10299	31.3726	30.3201	30.7356	39.0948	36.3292	36.5451	-0.276694	1.35337e-15	down
RNF6	6049	25.6282	26.7179	26.3963	19.4286	18.849	19.8801	0.43717	1.36283e-15	up
ZBTB43	23099	2.63173	2.74353	2.77725	4.33972	4.06984	4.1946	-0.628582	1.3629e-15	down
PROCR	10544	3.35753	2.76382	3.24869	6.24052	7.44099	6.85619	-1.13215	1.42474e-15	down
SLC25A43	203427	11.1289	11.217	10.0672	16.0336	17.8834	15.6915	-0.614009	1.43338e-15	down
ESYT1	23344	9.75355	9.26932	10.2403	13.1658	13.3644	12.8739	-0.429262	1.48592e-15	down
CATSPER1	117144	0.555509	0.323391	0.449745	1.57262	2.24234	1.80611	-2.08089	1.51352e-15	down
RASSF3	283349,83593	2.66874	2.75263	2.66644	4.77442	4.38111	5.15265	-0.823018	1.52587e-15	down
LFNG	3955	2.0029	1.45819	1.84185	0.519428	0.514966	0.553232	1.73992	1.52908e-15	up
L3MBTL2-AS1	100506544	0.77775	0.615452	0.744458	2.0512	1.67859	1.79942	-1.37104	1.53571e-15	down
H2AC6	8334	57.4904	58.4228	60.9613	40.9723	42.905	35.7525	0.564149	1.54685e-15	up
HMOX1	3162	15.1119	17.4538	17.5253	10.0477	10.5976	9.38312	0.738218	1.55812e-15	up
FGFR2	2263	2.04203	2.17055	2.30856	1.36104	1.36901	1.42422	0.650526	1.57202e-15	up
JUP	3728	84.4115	90.3591	87.2464	104.342	107.866	104.905	-0.275333	1.67088e-15	down
IFRD1	3475	6.92203	5.71698	6.61362	9.23529	10.4311	9.01348	-0.57498	1.67484e-15	down
MOAP1	64112	29.4635	29.6497	31.8361	40.3637	40.8303	37.959	-0.389682	1.67915e-15	down
N4BP1	9683	9.86515	10.3155	10.0123	13.6	12.657	14.1891	-0.421794	1.69179e-15	down
ARL6	84100	5.05817	4.63741	4.14659	2.56141	2.23883	2.30293	0.962536	1.70658e-15	up
JMJD1C	221037	16.1778	15.3824	15.0238	11.6134	8.96638	9.95357	0.60945	1.71604e-15	up
CDC26	246184	25.7339	27.9606	25.9438	15.8913	16.5928	14.4773	0.761986	1.71966e-15	up
RPL30	6156	69.7917	73.4582	74.0555	93.5998	109.345	89.7255	-0.429551	1.72068e-15	down
WASF2	10163	23.8095	24.5127	24.9239	31.1855	29.4152	32.2559	-0.342254	1.74989e-15	down
INPPL1	3636	11.8866	12.1809	12.5881	15.571	15.7872	15.439	-0.35239	1.76406e-15	down
GNE	10020	2.80528	2.71072	2.96343	4.39841	4.47381	4.49144	-0.656275	1.77467e-15	down
TWF2	11344	5.64263	4.82834	5.47837	7.81559	8.85968	8.75418	-0.673004	1.79844e-15	down
IFFO2	126917	12.4836	12.1843	13.6902	16.7987	16.4354	17.63	-0.407113	1.81327e-15	down
CEP63	80254	1.39109	1.43763	1.41223	0.928825	0.819937	0.86803	0.696588	1.83844e-15	up
KIF21B	23046	0.928999	0.798184	0.97694	1.61721	1.54822	1.83901	-0.88805	1.88102e-15	down
TOMM34	10953	26.4205	28.1628	29.5405	37.3587	41.1331	37.9733	-0.469311	1.88869e-15	down
ZNF281	23528	8.21832	9.44785	8.14417	12.806	12.7813	12.3053	-0.553968	1.90438e-15	down
YAP1	10413	46.4284	45.5186	46.9581	59.0733	53.7086	59.2002	-0.308159	1.91088e-15	down
EPS8L1	54869	3.14389	3.32326	3.55582	5.10257	5.37596	5.44707	-0.668038	1.92822e-15	down
STC2	8614	24.8777	22.9075	25.012	31.8122	29.6545	31.4136	-0.351492	1.93105e-15	down
PRDX1	5052	479.41	459.422	487.829	357.724	392.856	362.858	0.357621	1.94298e-15	up
FZD10	11211	1.1148	1.01901	1.21881	2.58691	2.77306	2.56231	-1.24063	1.98645e-15	down
KANSL1	284058	3.77441	3.81013	3.84807	2.67605	2.70872	2.8715	0.469592	2.01032e-15	up
PLEKHA8	84725,51054	2.63351	2.64495	2.5563	4.12293	3.61087	3.98318	-0.580641	2.03752e-15	down
TGFB2	7042	0.309833	0.233505	0.54107	1.49014	1.19427	1.42061	-1.92048	2.09176e-15	down
CLN5	1203	1.5935	1.69712	1.5888	1.0547	0.978458	1.02719	0.67301	2.09905e-15	up
FUNDC2	65991	4.14871	4.44781	4.47296	2.65848	2.81373	2.18826	0.770697	2.17527e-15	up
LYST	1130	0.936496	0.876537	0.91223	1.52469	1.26542	1.52348	-0.662493	2.20565e-15	down
NXPH4	11247	2.31394	2.50901	2.82822	5.16984	5.42577	5.5383	-1.07634	2.24632e-15	down
UBP1	7342	15.7362	16.0231	15.4591	11.7884	11.5455	12.1747	0.411181	2.25567e-15	up
TCF19	6941	16.9686	17.0401	17.4069	12.0415	11.6684	12.2578	0.5155	2.35609e-15	up
RXYLT1	10329	3.3801	3.0479	3.08545	1.9621	1.98684	1.79859	0.727027	2.41539e-15	up
OVOL1	5017	0.568066	0.718395	0.523145	1.91717	1.86415	1.61077	-1.57517	2.45488e-15	down
ENSG00000286178		11.9773	12.0884	12.2918	2.51931	2.66232	3.05799	2.14161	2.45844e-15	up
PCDH9	5101	0.326947	0.244594	0.252964	0.0915948	0.0989997	0.102562	1.49186	2.49701e-15	up
ABCC5	10057	10.0172	9.90366	10.6846	7.6827	6.86563	7.4383	0.477161	2.54112e-15	up
ZBED1	9189	6.93161	7.03526	7.72674	4.41218	4.48591	4.65006	0.679174	2.57715e-15	up
MCFD2	90411	16.5385	16.5854	16.2592	21.0594	20.495	20.6	-0.33184	2.61364e-15	down
RAPGEF3	10411	1.77092	1.50798	1.92237	2.72698	3.54848	2.92344	-0.8226	2.62856e-15	down
GOLIM4	27333	19.3591	19.6121	18.837	13.5086	13.5098	14.3145	0.483984	2.67846e-15	up
FGD5-AS1	100505641	19.9986	20.6128	20.766	25.0149	25.3964	25.3763	-0.304254	2.7463e-15	down
AUP1	550	35.0011	36.6485	36.3364	47.0208	50.1947	44.9127	-0.396347	2.80396e-15	down
CDYL	9425	11.3187	12.0238	11.9033	15.6186	15.8098	15.6006	-0.416096	2.90114e-15	down
ARF1	375,442334	109.156	111.501	118.121	134.382	148.039	137.023	-0.308139	2.91036e-15	down
MCL1	4170	69.0573	68.6245	70.7904	83.5402	80.2273	80.3325	-0.227617	2.91438e-15	down
UBR4	23352	8.93936	8.83787	9.71004	12.4244	10.8957	12.4364	-0.379443	3.02913e-15	down
RAD51C	5889	2.42683	2.42239	2.40198	1.57104	1.60672	1.58223	0.607259	3.14274e-15	up
TNFRSF10B	8795	14.9984	15.1617	15.769	21.193	19.529	19.4159	-0.388866	3.20631e-15	down
TRIM25	7706	15.6925	15	16.2404	11.7286	10.7798	12.1293	0.438255	3.21868e-15	up
ATP11A	23250	7.40244	7.24642	7.32736	5.042	4.94062	5.57621	0.49821	3.2352e-15	up
ZNF503	84858	4.39944	4.31646	4.59415	7.03263	7.15449	7.28553	-0.689983	3.26539e-15	down
BMP8B	656	2.10512	2.20388	2.02731	3.85913	3.75086	3.57542	-0.819905	3.30752e-15	down
SNX11	29916	7.37321	7.464	8.75228	4.57793	4.8662	4.52381	0.756026	3.38808e-15	up
HOXB13	10481	4.76413	5.72508	4.81384	2.28569	2.60202	2.32716	1.08478	3.41045e-15	up
HSP90B1	7184	77.5379	76.7731	76.3977	91.7837	90.2863	87.1013	-0.222452	3.42577e-15	down
TRABD2A	129293	0.638264	0.838923	0.763365	1.47064	1.57691	1.87364	-1.13515	3.47719e-15	down
KDELR1	10945	40.6512	43.0952	40.1155	51.711	57.353	57.5157	-0.42748	3.5067e-15	down
ENSG00000260196		0.563778	0.510426	0.404363	1.51087	1.95304	1.87447	-1.85221	3.51363e-15	down
ABCA3	21	0.642793	0.537574	0.583763	1.2956	1.22195	1.41679	-1.15717	3.51934e-15	down
TERF2IP	54386	9.5133	9.17295	10.5302	13.2646	14.6386	13.6313	-0.507533	3.58063e-15	down
EEF1A1P5	158078	508.068	442.177	476.023	581.231	589.037	589.286	-0.302965	3.61827e-15	down
MRPL23	6150	8.99537	8.72406	8.57808	4.94434	5.43028	5.1676	0.758735	3.62147e-15	up
NDFIP1	80762	13.8487	14.6567	14.7339	19.2535	18.0451	20.2144	-0.411546	3.68519e-15	down
SAMD1	90378	5.47555	6.24665	5.2472	10.141	10.2308	9.35838	-0.808992	3.69655e-15	down
ANXA1	301	187.104	188.476	190.229	230.547	249.15	218.122	-0.302537	3.79377e-15	down
SLC38A1	81539	35.7574	35.2988	36.1523	45.4815	41.1243	45.1104	-0.297014	3.84728e-15	down
ZNF678	339500	1.3475	1.25556	1.28715	2.36817	2.05782	2.41936	-0.815279	4.15823e-15	down
INTS7	25896	12.0137	12.21	12.0991	8.54	8.63515	7.77813	0.541648	4.15962e-15	up
IGF2BP3	10643	7.38378	7.14399	7.43283	9.83496	9.23515	9.73023	-0.391168	4.16453e-15	down
DSP	1832,1834	58.1731	55.6405	57.8152	45.5945	41.4574	45.9882	0.367431	4.23597e-15	up
DNMT1	1786	14.404	14.1073	14.9047	11.4432	11.4295	11.4613	0.338588	4.2969e-15	up
TJP2	9414	10.0469	8.00834	9.41736	13.0544	12.3154	12.4232	-0.460127	4.30886e-15	down
UPF2	26019	11.6227	11.0196	10.7033	7.8194	7.20741	7.70774	0.552606	4.60523e-15	up
SNAPIN	23557	24.0485	23.0157	22.4856	13.9456	15.3333	14.0528	0.682621	4.6121e-15	up
BZW1	9689	17.0353	16.0978	16.7273	21.0235	20.1896	20.3113	-0.303265	4.67239e-15	down
IFT172	26160	1.2016	1.1419	1.0624	0.641143	0.541161	0.531771	0.990602	4.68016e-15	up
PATZ1	23598	9.23165	9.47115	10.2492	6.14132	6.77748	6.42785	0.58158	4.87777e-15	up
UBA7	7318	5.67921	5.06266	5.30178	3.1981	3.09678	2.82602	0.814755	5.11203e-15	up
SLC35B3	51000	8.77222	9.03207	8.57215	5.75507	5.58451	5.35189	0.660138	5.4472e-15	up
CDK7	1022	19.3521	18.8425	18.995	25.4578	26.4451	25.1256	-0.42964	5.65166e-15	down
FLRT2	23768	0.453819	0.422628	0.488123	0.254781	0.214897	0.229298	0.965132	5.6697e-15	up
GNAL	2774	1.01739	1.23291	1.23578	2.2498	2.43915	2.00185	-0.940573	5.81758e-15	down
NUCKS1	64710	127.272	125.528	129.979	100.033	93.3438	104.616	0.361231	5.99775e-15	up
DVL1	1855,8215	10.3428	9.71178	10.4924	14.2963	16.3906	13.9154	-0.546086	6.02693e-15	down
INTS9	55756	3.9132	3.88712	3.77185	2.06076	2.20981	2.12398	0.855747	6.30807e-15	up
SNX19	399979	9.27342	8.60604	9.22866	6.91068	6.15285	6.7404	0.452938	6.48595e-15	up
SNX33	257364	3.72848	3.65013	3.98458	5.42364	5.32762	5.35725	-0.503456	6.55263e-15	down
CHURC1	91612	16.9574	17.2767	17.5256	13.0672	12.7022	12.2648	0.444534	6.73251e-15	up
YWHAQ	10971	100.799	104.406	100.94	121.448	127.7	122.037	-0.277922	6.78748e-15	down
TMEM63B	55362	10.4734	10.4078	11.0486	15.3701	13.9942	14.2521	-0.449963	6.85649e-15	down
CFAP410	755	2.33596	2.49408	2.43635	1.06618	1.09547	1.31313	1.06432	6.914e-15	up
GTF2F2	2963	8.74673	9.4441	8.43186	12.6205	13.8329	12.926	-0.564781	6.94389e-15	down
IGSF10	285313	0.559766	0.447524	0.469893	0.109419	0.133078	0.135666	1.96577	7.1481e-15	up
PSME3	10197	37.9865	39.8414	39.6814	30.0738	30.3784	30.7334	0.365897	7.22782e-15	up
KCNJ2	3759	1.47533	1.79092	2.15087	0.725065	0.670247	0.521478	1.49883	7.41468e-15	up
PHF5A	84844	117.891	110.654	124.426	79.9654	89.5607	74.9186	0.530041	7.45279e-15	up
VPS39	23339	10.7298	10.5589	11.8755	7.94797	8.08604	7.56543	0.490877	7.46758e-15	up
ADGRL1	22859	3.22063	2.93835	3.23238	4.71109	4.37694	4.815	-0.565994	7.75746e-15	down
HARS1	3035	7.52662	7.31179	7.93687	5.32266	5.79812	5.48375	0.455892	7.92209e-15	up
NUDCD1	84955	6.57861	6.45855	6.32242	8.71273	8.80626	8.08287	-0.403201	8.02983e-15	down
PPA1	5464	23.0456	23.3217	22.3166	29.1529	32.0474	28.4795	-0.384812	8.14066e-15	down
SACM1L	22908	7.41506	7.54638	7.85281	5.38715	5.07808	5.31425	0.531887	8.19574e-15	up
CECR2	27443	0.198622	0.21037	0.241773	0.621905	0.540898	0.664584	-1.48957	8.43731e-15	down
UIMC1	51720	10.5053	11.0067	10.1123	5.76182	7.25393	5.99376	0.734314	8.51497e-15	up
GNB1	2782	31.1976	33.2097	33.2093	40.7604	38.6503	41.1263	-0.304277	8.8773e-15	down
ANKRD17	26057	13.055	13.2769	12.9365	10.3242	9.77568	9.65997	0.4	9.01606e-15	up
ENSG00000270127		3.42242	3.65661	3.97712	1.60121	1.47673	1.44176	1.29055	9.15356e-15	up
MSN	4478	18.0212	18.6084	17.9113	22.0632	22.4988	21.7079	-0.281015	9.38928e-15	down
TCEAL1	9338	8.83661	8.56155	8.94271	3.74734	4.76235	3.8402	1.09281	9.60227e-15	up
METRN	79006	0.477702	0.750681	0.48033	1.75892	2.1702	1.7394	-1.73006	9.74743e-15	down
RNF112	7732	0.755632	0.789263	0.771759	2.04112	2.01632	1.79277	-1.33645	9.79648e-15	down
C2CD5	9847	12.7366	12.72	12.5406	9.42202	8.91965	9.32245	0.457878	1.00657e-14	up
KIFC3	3801	4.39749	4.40434	4.79912	6.49127	6.33634	5.95019	-0.465319	1.02301e-14	down
BRF1	2972,677	3.50406	3.24471	3.5768	2.29708	2.34427	2.22698	0.588188	1.03037e-14	up
IGFBP6	3489	56.0036	49.5322	62.2227	77.0695	77.2497	87.4617	-0.527315	1.03913e-14	down
RPA3	6119	11.933	12.8294	12.5037	8.31937	7.9886	7.25892	0.661103	1.04291e-14	up
UBN1	29855	9.67954	9.0698	9.8351	12.0056	12.286	12.1103	-0.348783	1.04922e-14	down
UAP1L1	91373	2.03035	2.10999	1.82301	3.76319	3.29515	3.77683	-0.861526	1.06946e-14	down
ENSG00000182021		0.0410327	0.0331853	0.0414335	0.360795	0.477205	0.32481	-3.32976	1.14802e-14	down
EIF3B	8662	16.7018	16.7688	17.8244	20.6619	20.8671	21.9889	-0.308348	1.15248e-14	down
IST1	9798	27.203	26.7395	27.389	32.8166	34.0913	31.6809	-0.277609	1.1542e-14	down
LIPE	3991	0.635492	0.579364	0.800808	1.6683	1.5569	1.82868	-1.32613	1.17142e-14	down
IFNE	338376	2.0565	1.98981	2.47835	0.480162	0.358686	0.404465	2.39171	1.20005e-14	up
HNRNPUL1	11100	85.72	90.0433	88.4402	69.638	71.0048	71.4489	0.316961	1.23184e-14	up
ZDHHC21	340481	12.5607	12.4855	12.3404	9.07253	6.87384	8.21019	0.630108	1.23602e-14	up
GTF3C6	112495	41.9632	43.0551	43.075	24.4958	28.0898	28.0424	0.667844	1.26744e-14	up
CEP350	9857	6.41279	6.116	6.46665	4.16594	3.30798	4.39276	0.678737	1.30334e-14	up
EXOSC8	11340	3.59928	3.62781	3.56803	4.72707	5.0139	4.78371	-0.428126	1.36057e-14	down
CNPY4	245812	2.5889	2.66341	3.24566	0.941881	0.975122	1.05167	1.5173	1.37139e-14	up
CENPF	1063	30.2848	30.0892	28.7618	12.1587	7.49968	10.5954	1.5589	1.38381e-14	up
ECHS1	1892	75.4545	76.8295	74.7649	52.5297	57.7197	52.6256	0.479238	1.38528e-14	up
SFPQ	6421,654780	55.7479	56.1436	58.3157	46.5998	42.5599	44.6667	0.346929	1.38832e-14	up
SLC1A4	6509	3.6115	3.2377	3.53954	5.10249	5.43256	4.99233	-0.579793	1.39543e-14	down
PKNOX1	5316	4.75035	5.28567	4.90327	3.03732	3.2852	2.80498	0.71082	1.42283e-14	up
TTC19	54902	10.0281	10.2475	10.243	7.24042	6.93789	6.12571	0.587926	1.44978e-14	up
ACOT1	641371	9.73349	10.8824	10.1206	5.17759	5.77967	4.93341	0.951771	1.4621e-14	up
CC2D1B	200014	6.74286	6.72388	6.5532	4.72045	4.22986	4.43406	0.580889	1.4933e-14	up
BTG1	694	10.7473	11.122	10.8229	14.1973	15.1073	14.3585	-0.417464	1.50916e-14	down
CLMP	79827	0.394762	0.459324	0.394412	1.08576	1.25834	1.22855	-1.5168	1.52001e-14	down
[truncated: 33,535 more rows]
